# Supplementary material for: Rosavin improves insulin resistance and alleviates hepatic and kidney damage via modulating the cGAS-STING pathway and autophagy signaling in HFD/STZ-induced T2DM animals
Source: Royal Society of Chemistry journal article supplement (doi:10.1039/d4md00023d), 2024-01-01
Supplement: d4md00023d1.xlsx [file d4md00023d1.xlsx]

## Sheet: GSE142025. Three gp
GeneID	padj	pvalue	Symbol
3164	4.81e-85	1.7e-89	NR4A1
107984510	5e-76	3.53e-80	LOC107984510
4929	4.43e-65	4.69e-69	NR4A2
2354	4.29e-58	6.06e-62	FOSB
467	1.48e-56	2.61e-60	ATF3
109136578	1.15e-46	2.44e-50	MASCRNA
1843	3.33e-43	8.23e-47	DUSP1
8013	1.76e-37	4.98e-41	NR4A3
1958	4.35e-34	1.38e-37	EGR1
7633	1.23e-33	4.33e-37	ZNF79
7538	4.83e-33	2.22e-36	ZFP36
3491	6.54e-33	3.23e-36	CCN1
256957	8.31e-33	4.4e-36	HEATR9
716	2.88e-30	1.62e-33	C1S
105371378	1.98e-28	1.19e-31	LOC105371378
7832	2.9e-27	1.84e-30	BTG2
124540	5.06e-27	3.39e-30	MSI2
64231	1.68e-26	1.24e-29	MS4A6A
4574	3.76e-25	3.05e-28	TRNS1
100129354	7.21e-25	6.11e-28	NRADDP
493869	7.27e-25	6.41e-28	GPX8
57468	8.4e-25	7.7e-28	SLC12A5
23432	8.56e-25	8.16e-28	GPR161
2200	1.2e-24	1.23e-27	FBN1
23461	1.2e-24	1.22e-27	ABCA5
150094	1.31e-24	1.38e-27	SIK1
100128908	2.32e-24	2.54e-27	CIROP
4550	2.34e-24	2.64e-27	RNR2
152007	3.27e-24	3.81e-27	GLIPR2
8445	3.49e-24	4.19e-27	DYRK2
10299	4.84e-24	5.98e-27	MARCHF6
6515	5.21e-24	6.62e-27	SLC2A3
4616	7.52e-24	9.82e-27	GADD45B
114789	7.63e-24	1.02e-26	SLC25A25
102724428	8.87e-24	1.22e-26	LOC102724428
55366	1.21e-23	1.7e-26	LGR4
5961	1.4e-23	2.02e-26	PRPH2
105378950	1.45e-23	2.2e-26	LOC105378950
4539	1.45e-23	2.18e-26	ND4L
90273	1.57e-23	2.44e-26	CEACAM21
3903	1.85e-23	2.93e-26	LAIR1
284613	1.99e-23	3.23e-26	CYB561D1
9242	2.36e-23	3.91e-26	MSC
1462	2.53e-23	4.28e-26	VCAN
4064	4.52e-23	7.97e-26	CD180
55290	5.78e-23	1.04e-25	BRF2
3726	6.3e-23	1.18e-25	JUNB
105370538	7.24e-23	1.38e-25	LOC105370538
1281	1.25e-22	2.42e-25	COL3A1
715	1.37e-22	2.7e-25	C1R
100287290	1.44e-22	2.89e-25	LOC100287290
1293	1.62e-22	3.32e-25	COL6A3
92597	2.68e-22	5.58e-25	MOB1B
4549	4.39e-22	9.31e-25	RNR1
57863	4.78e-22	1.03e-24	CADM3
4541	5.42e-22	1.19e-24	ND6
105369736	5.55e-22	1.24e-24	LOC105369736
10402	6.09e-22	1.38e-24	ST3GAL6
10287	7.24e-22	1.66e-24	RGS19
4537	7.38e-22	1.72e-24	ND3
2532	8.69e-22	2.05e-24	ACKR1
2350	8.84e-22	2.12e-24	FOLR2
2191	9.76e-22	2.38e-24	FAP
3725	1.03e-21	2.54e-24	JUN
9194	1.08e-21	2.7e-24	SLC16A7
84433	1.11e-21	2.81e-24	CARD11
284021	1.24e-21	3.2e-24	MILR1
8832	1.31e-21	3.43e-24	CD84
79987	1.4e-21	3.71e-24	SVEP1
107984825	1.4e-21	3.76e-24	LOC107984825
55500	1.41e-21	3.84e-24	ETNK1
10560	1.83e-21	5.05e-24	SLC19A2
1117	2.06e-21	5.73e-24	CHI3L2
11167	2.42e-21	6.83e-24	FSTL1
84525	2.58e-21	7.38e-24	HOPX
917	2.96e-21	8.68e-24	CD3G
3071	2.96e-21	8.65e-24	NCKAP1L
81557	3.02e-21	8.95e-24	MAGED4B
54440	3.37e-21	1.01e-23	SASH3
28638	3.57e-21	1.08e-23	TRBC2
105373791	3.81e-21	1.17e-23	LOC105373791
2675	4.19e-21	1.3e-23	GFRA2
5880	4.29e-21	1.35e-23	RAC2
124460	4.55e-21	1.44e-23	SNX20
729230	4.88e-21	1.57e-23	CCR2
245812	5.09e-21	1.65e-23	CNPY4
6366	6.03e-21	1.98e-23	CCL21
107984791	6.8e-21	2.26e-23	LOC107984791
1520	7.43e-21	2.49e-23	CTSS
3936	8.86e-21	3e-23	LCP1
25816	9.42e-21	3.22e-23	TNFAIP8
283446	9.63e-21	3.34e-23	MYO1H
240	1.43e-20	5.1e-23	ALOX5
1983	1.43e-20	5.08e-23	EIF5
3280	1.43e-20	5.2e-23	HES1
219654	1.43e-20	5.16e-23	ZCCHC24
7409	1.44e-20	5.3e-23	VAV1
50619	1.46e-20	5.42e-23	DEF6
4060	1.46e-20	5.44e-23	LUM
92344	1.61e-20	6.09e-23	GORAB
2308	1.7e-20	6.49e-23	FOXO1
107986015	1.74e-20	6.71e-23	LOC107986015
27240	1.78e-20	6.92e-23	SIT1
11151	2.41e-20	9.42e-23	CORO1A
107987132	2.53e-20	1.01e-22	LOC107987132
4316	2.53e-20	1e-22	MMP7
5724	2.6e-20	1.04e-22	PTAFR
9592	2.62e-20	1.06e-22	IER2
105373618	3.51e-20	1.44e-22	LOC105373618
11270	3.64e-20	1.5e-22	NRM
1536	3.68e-20	1.53e-22	CYBB
25797	3.81e-20	1.6e-22	QPCT
5820	3.85e-20	1.63e-22	PVT1
60489	4.01e-20	1.71e-22	APOBEC3G
914	4.19e-20	1.8e-22	CD2
6404	4.2e-20	1.84e-22	SELPLG
54822	4.2e-20	1.83e-22	TRPM7
3932	4.44e-20	1.96e-22	LCK
105370114	5.67e-20	2.52e-22	LOC105370114
962	5.67e-20	2.57e-22	CD48
256380	5.67e-20	2.56e-22	SCML4
286336	5.67e-20	2.58e-22	FAM78A
113146	5.91e-20	2.71e-22	AHNAK2
55843	6.03e-20	2.8e-22	ARHGAP15
9518	6.03e-20	2.81e-22	GDF15
728239	6.22e-20	2.92e-22	MAGED4
51659	6.26e-20	2.96e-22	GINS2
64005	6.94e-20	3.36e-22	MYO1G
3037	6.94e-20	3.33e-22	HAS2
915	7.56e-20	3.71e-22	CD3D
22806	7.56e-20	3.71e-22	IKZF3
8740	8.03e-20	3.97e-22	TNFSF14
695	8.5e-20	4.23e-22	BTK
894	8.68e-20	4.35e-22	CCND2
105377031	9.42e-20	4.75e-22	LINC02033
7462	1.1e-19	5.61e-22	LAT2
1356	1.18e-19	6.05e-22	CP
10846	1.19e-19	6.11e-22	PDE10A
834	1.21e-19	6.25e-22	CASP1
1009	1.31e-19	6.87e-22	CDH11
342372	1.34e-19	7.06e-22	PKD1L3
3684	1.4e-19	7.48e-22	ITGAM
23208	1.54e-19	8.24e-22	SYT11
1794	1.69e-19	9.13e-22	DOCK2
167153	2.09e-19	1.14e-21	TENT2
7293	2.27e-19	1.24e-21	TNFRSF4
4509	2.41e-19	1.33e-21	ATP8
3001	2.63e-19	1.45e-21	GZMA
963	2.63e-19	1.47e-21	CD53
4239	2.76e-19	1.55e-21	MFAP4
107986454	2.88e-19	1.63e-21	LOC107986454
719	2.9e-19	1.65e-21	C3AR1
85001	2.9e-19	1.66e-21	MGC16275
919	3.16e-19	1.82e-21	CD247
916	3.23e-19	1.87e-21	CD3E
54331	3.39e-19	1.97e-21	GNG2
8522	3.44e-19	2.01e-21	GAS7
11326	3.63e-19	2.15e-21	VSIG4
8406	3.7e-19	2.21e-21	SRPX
256076	4.14e-19	2.49e-21	COL6A5
648987	4.96e-19	3.01e-21	ANXA2R-OT1
121952	6.35e-19	3.88e-21	METTL21EP
8976	6.59e-19	4.05e-21	WASL
4046	6.66e-19	4.11e-21	LSP1
10406	6.71e-19	4.17e-21	WFDC2
283897	7.95e-19	4.96e-21	C16orf54
387357	8.61e-19	5.41e-21	THEMIS
93487	9.71e-19	6.17e-21	MAPK1IP1L
7805	1.02e-18	6.52e-21	LAPTM5
58504	1.18e-18	7.63e-21	ARHGAP22
128553	1.18e-18	7.64e-21	TSHZ2
51744	1.3e-18	8.42e-21	CD244
10320	1.34e-18	8.77e-21	IKZF1
120425	1.5e-18	9.83e-21	JAML
55016	1.55e-18	1.02e-20	MARCHF1
9641	1.58e-18	1.05e-20	IKBKE
2104	1.74e-18	1.16e-20	ESRRG
10186	1.79e-18	1.2e-20	LHFPL6
3910	1.81e-18	1.22e-20	LAMA4
8553	1.82e-18	1.23e-20	BHLHE40
27306	1.92e-18	1.31e-20	HPGDS
5294	1.95e-18	1.35e-20	PIK3CG
23230	2e-18	1.38e-20	VPS13A
11262	2.18e-18	1.51e-20	SP140
3561	2.26e-18	1.58e-20	IL2RG
105374790	2.36e-18	1.66e-20	LOC105374790
170371	2.41e-18	1.72e-20	TMEM273
4192	2.41e-18	1.72e-20	MDK
170691	2.58e-18	1.85e-20	ADAMTS17
8431	2.65e-18	1.91e-20	NR0B2
55186	3.08e-18	2.23e-20	SLC25A36
2672	3.18e-18	2.33e-20	GFI1
130507	3.18e-18	2.32e-20	UBR3
945	3.21e-18	2.36e-20	CD33
1602	3.24e-18	2.39e-20	DACH1
146850	3.38e-18	2.5e-20	PIK3R6
497189	3.99e-18	2.97e-20	TIFAB
913	4.14e-18	3.1e-20	CD1E
4360	4.26e-18	3.21e-20	MRC1
51063	4.51e-18	3.4e-20	CALHM2
105371967	4.52e-18	3.43e-20	LOC105371967
257106	4.63e-18	3.53e-20	ARHGAP30
2207	4.67e-18	3.58e-20	FCER1G
4689	4.7e-18	3.62e-20	NCF4
50863	4.8e-18	3.71e-20	NTM
3055	4.87e-18	3.78e-20	HCK
8123	4.92e-18	3.84e-20	PWAR5
9667	5.1e-18	4e-20	SAFB2
151056	5.5e-18	4.33e-20	PLB1
5396	5.52e-18	4.42e-20	PRRX1
3078	5.52e-18	4.4e-20	CFHR1
100507103	5.52e-18	4.42e-20	LINC02937
2353	5.52e-18	4.37e-20	FOS
7037	6.06e-18	4.88e-20	TFRC
28639	6.14e-18	4.96e-20	TRBC1
115004	6.19e-18	5.03e-20	CGAS
57332	6.23e-18	5.08e-20	CBX8
9398	6.33e-18	5.19e-20	CD101
8500	6.62e-18	5.45e-20	PPFIA1
57198	7.61e-18	6.31e-20	ATP8B2
10417	7.61e-18	6.31e-20	SPON2
5330	7.65e-18	6.38e-20	PLCB2
7076	7.87e-18	6.58e-20	TIMP1
55450	7.98e-18	6.7e-20	CAMK2N1
7431	8.8e-18	7.43e-20	VIM
8450	1.03e-17	8.73e-20	CUL4B
56889	1.13e-17	9.59e-20	TM9SF3
114836	1.22e-17	1.04e-19	SLAMF6
56603	1.3e-17	1.12e-19	CYP26B1
11035	1.3e-17	1.12e-19	RIPK3
4050	1.38e-17	1.2e-19	LTB
107984261	1.47e-17	1.28e-19	LOC107984261
115761	1.49e-17	1.3e-19	ARL11
353345	1.52e-17	1.33e-19	GPR141
1234	1.64e-17	1.44e-19	CCR5
219855	1.64e-17	1.46e-19	SLC37A2
100506736	1.73e-17	1.54e-19	SLFN12L
6504	1.79e-17	1.6e-19	SLAMF1
100506385	1.79e-17	1.61e-19	LINC01426
113115	1.82e-17	1.65e-19	MTFR2
7752	1.91e-17	1.73e-19	ZNF200
80774	1.91e-17	1.74e-19	LIMD2
1295	1.93e-17	1.77e-19	COL8A1
2213	1.96e-17	1.8e-19	FCGR2B
100189122	2.04e-17	1.88e-19	TRK-TTT3-1
26002	2.07e-17	1.91e-19	MOXD1
727936	2.07e-17	1.93e-19	GXYLT2
27071	2.07e-17	1.94e-19	DAPP1
107985430	2.07e-17	1.94e-19	LOC107985430
8301	2.08e-17	1.96e-19	PICALM
7746	2.17e-17	2.04e-19	ZSCAN9
5341	2.22e-17	2.1e-19	PLEK
27181	2.28e-17	2.17e-19	SIGLEC8
1513	2.38e-17	2.27e-19	CTSK
9402	2.5e-17	2.39e-19	GRAP2
3059	2.65e-17	2.55e-19	HCLS1
285590	2.68e-17	2.58e-19	SH3PXD2B
116828	2.77e-17	2.68e-19	N4BP2L2-IT2
9046	2.82e-17	2.74e-19	DOK2
5788	3.02e-17	2.95e-19	PTPRC
415116	3.02e-17	2.95e-19	PIM3
912	3.17e-17	3.11e-19	CD1D
10333	3.27e-17	3.22e-19	TLR6
3683	3.29e-17	3.26e-19	ITGAL
57531	3.36e-17	3.34e-19	HACE1
56938	3.44e-17	3.42e-19	BMAL2
1960	3.72e-17	3.73e-19	EGR3
3662	3.81e-17	3.85e-19	IRF4
3109	3.81e-17	3.83e-19	HLA-DMB
355	3.95e-17	4.01e-19	FAS
11184	3.95e-17	4.02e-19	MAP4K1
65986	4.06e-17	4.16e-19	ZBTB10
9840	4.06e-17	4.15e-19	TESPA1
348938	4.21e-17	4.34e-19	NIPAL4
132160	4.39e-17	4.54e-19	PPM1M
401014	4.4e-17	4.56e-19	TEX41
10095	4.5e-17	4.69e-19	ARPC1B
7058	4.95e-17	5.17e-19	THBS2
10859	4.96e-17	5.2e-19	LILRB1
3455	5.02e-17	5.28e-19	IFNAR2
116986	5.34e-17	5.66e-19	AGAP2
9229	5.34e-17	5.66e-19	DLGAP1
29108	5.48e-17	5.82e-19	PYCARD
1135	5.67e-17	6.05e-19	CHRNA2
2533	6.18e-17	6.64e-19	FYB1
4540	6.28e-17	6.76e-19	ND5
356	6.34e-17	6.84e-19	FASLG
9920	6.41e-17	6.95e-19	KBTBD11
80829	6.42e-17	6.97e-19	ZFP91
712	6.83e-17	7.46e-19	C1QA
8728	6.83e-17	7.5e-19	ADAM19
221472	6.97e-17	7.68e-19	FGD2
23533	7.16e-17	7.91e-19	PIK3R5
3394	7.49e-17	8.3e-19	IRF8
51316	7.49e-17	8.35e-19	PLAC8
7045	7.49e-17	8.36e-19	TGFBI
100130701	7.57e-17	8.46e-19	LRRC58-DT
7305	8.34e-17	9.36e-19	TYROBP
130074	9.09e-17	1.02e-18	FAM168B
144165	9.14e-17	1.03e-18	PRICKLE1
105374746	9.51e-17	1.08e-18	LOC105374746
53347	9.63e-17	1.09e-18	UBASH3A
22849	1.01e-16	1.15e-18	CPEB3
9536	1.04e-16	1.19e-18	PTGES
220	1.07e-16	1.22e-18	ALDH1A3
1296	1.07e-16	1.24e-18	COL8A2
83851	1.11e-16	1.28e-18	SYT16
79626	1.15e-16	1.33e-18	TNFAIP8L2
301	1.21e-16	1.41e-18	ANXA1
64127	1.22e-16	1.42e-18	NOD2
107984254	1.23e-16	1.43e-18	LOC107984254
154	1.26e-16	1.48e-18	ADRB2
8477	1.27e-16	1.49e-18	GPR65
1278	1.28e-16	1.51e-18	COL1A2
29922	1.3e-16	1.53e-18	NME7
131450	1.32e-16	1.57e-18	CD200R1
23149	1.32e-16	1.56e-18	FCHO1
3003	1.33e-16	1.59e-18	GZMK
107986959	1.5e-16	1.8e-18	LOC107986959
9748	1.53e-16	1.84e-18	SLK
4069	1.54e-16	1.85e-18	LYZ
100130231	1.57e-16	1.9e-18	LINC00861
55013	1.6e-16	1.93e-18	MCUB
51411	1.73e-16	2.1e-18	BIN2
133308	1.79e-16	2.18e-18	SLC9B2
127703	1.85e-16	2.27e-18	C1orf216
10462	1.92e-16	2.36e-18	CLEC10A
147138	1.92e-16	2.36e-18	TMC8
100129697	1.95e-16	2.41e-18	LOC100129697
9358	1.97e-16	2.44e-18	ITGBL1
79901	1.97e-16	2.45e-18	CYBRD1
81537	1.97e-16	2.46e-18	SGPP1
146722	1.99e-16	2.48e-18	CD300LF
4556	2.04e-16	2.55e-18	TRNE
128611	2.05e-16	2.58e-18	ZNF831
105379461	2.24e-16	2.83e-18	LOC105379461
64333	2.3e-16	2.91e-18	ARHGAP9
105374925	2.35e-16	2.99e-18	LOC105374925
64926	2.43e-16	3.09e-18	RASAL3
64753	2.52e-16	3.22e-18	CCDC136
4067	2.54e-16	3.26e-18	LYN
160428	2.55e-16	3.27e-18	ALDH1L2
51719	2.56e-16	3.3e-18	CAB39
79689	2.58e-16	3.33e-18	STEAP4
53344	2.6e-16	3.37e-18	CHIC1
138199	2.6e-16	3.38e-18	CARNMT1
340061	2.64e-16	3.43e-18	STING1
29940	2.64e-16	3.45e-18	DSE
286527	2.67e-16	3.5e-18	TMSB15B
84766	2.71e-16	3.56e-18	CRACR2A
151887	2.71e-16	3.57e-18	CCDC80
29125	2.74e-16	3.61e-18	C11orf21
687	2.82e-16	3.73e-18	KLF9
3937	2.95e-16	3.92e-18	LCP2
9168	2.98e-16	3.96e-18	TMSB10
84695	3.13e-16	4.17e-18	LOXL3
9734	3.14e-16	4.2e-18	HDAC9
53827	3.14e-16	4.21e-18	FXYD5
107985690	3.23e-16	4.34e-18	LOC107985690
9466	3.27e-16	4.41e-18	IL27RA
105378116	3.28e-16	4.43e-18	LOC105378116
941	3.28e-16	4.45e-18	CD80
1436	3.63e-16	4.94e-18	CSF1R
51338	3.63e-16	4.95e-18	MS4A4A
3702	3.75e-16	5.13e-18	ITK
154810	3.87e-16	5.3e-18	AMOTL1
1796	3.93e-16	5.39e-18	DOK1
5733	3.93e-16	5.42e-18	PTGER3
100188949	4.01e-16	5.54e-18	LINC00426
9821	4.08e-16	5.64e-18	RB1CC1
55038	4.21e-16	5.85e-18	CDCA4
150726	4.23e-16	5.88e-18	FBXO41
4242	4.36e-16	6.08e-18	MFNG
109136579	4.48e-16	6.26e-18	TALAM1
105374940	4.52e-16	6.33e-18	LOC105374940
4121	4.68e-16	6.62e-18	MAN1A1
9863	4.68e-16	6.64e-18	MAGI2
122553	4.68e-16	6.65e-18	TRAPPC6B
3560	4.68e-16	6.59e-18	IL2RB
101927051	4.68e-16	6.61e-18	PDXP-DT
8320	4.7e-16	6.68e-18	EOMES
911	4.74e-16	6.76e-18	CD1C
6039	5.08e-16	7.26e-18	RNASE6
378938	5.11e-16	7.32e-18	MALAT1
785	5.18e-16	7.44e-18	CACNB4
7940	5.21e-16	7.51e-18	LST1
643680	5.21e-16	7.55e-18	MS4A4E
10538	5.21e-16	7.54e-18	BATF
133874	5.24e-16	7.61e-18	C5orf58
113	5.26e-16	7.65e-18	ADCY7
8989	5.36e-16	7.81e-18	TRPA1
105370322	5.39e-16	7.87e-18	LOC105370322
27185	5.45e-16	7.98e-18	DISC1
50852	5.61e-16	8.26e-18	TRAT1
3428	5.67e-16	8.36e-18	IFI16
10225	5.79e-16	8.56e-18	CD96
23387	5.97e-16	8.85e-18	SIK3
161145	5.97e-16	8.87e-18	TMEM229B
105371308	5.98e-16	8.91e-18	LOC105371308
7373	6.2e-16	9.25e-18	COL14A1
84674	6.77e-16	1.01e-17	CARD6
3004	7.08e-16	1.06e-17	GZMM
3787	7.08e-16	1.06e-17	KCNS1
137886	7.22e-16	1.09e-17	UBXN2B
105371307	7.26e-16	1.1e-17	LOC105371307
57823	7.69e-16	1.16e-17	SLAMF7
105375914	7.72e-16	1.17e-17	LOC105375914
397	7.72e-16	1.17e-17	ARHGDIB
2871	7.72e-16	1.18e-17	GRK6P1
101928658	7.8e-16	1.19e-17	LOC101928658
84439	7.82e-16	1.2e-17	HHIPL1
8698	8.23e-16	1.26e-17	S1PR4
923	8.39e-16	1.29e-17	CD6
2181	8.67e-16	1.34e-17	ACSL3
55422	8.91e-16	1.38e-17	ZNF331
154091	9.06e-16	1.4e-17	SLC2A12
9880	9.22e-16	1.43e-17	ZBTB39
3918	9.4e-16	1.46e-17	LAMC2
6402	9.57e-16	1.49e-17	SELL
9522	9.62e-16	1.5e-17	SCAMP1
399670	9.73e-16	1.53e-17	RPL13AP17
4535	9.93e-16	1.56e-17	ND1
101929623	9.93e-16	1.56e-17	LINC01215
5813	1.03e-15	1.62e-17	PURA
84636	1.07e-15	1.7e-17	GPR174
3594	1.09e-15	1.73e-17	IL12RB1
105372717	1.11e-15	1.76e-17	LOC105372717
5579	1.15e-15	1.83e-17	PRKCB
58490	1.15e-15	1.85e-17	RPRD1B
100188953	1.16e-15	1.85e-17	LINC00092
64098	1.17e-15	1.89e-17	PARVG
1844	1.25e-15	2.02e-17	DUSP2
105369767	1.35e-15	2.18e-17	LOC105369767
4976	1.37e-15	2.22e-17	OPA1
8792	1.42e-15	2.3e-17	TNFRSF11A
51439	1.45e-15	2.37e-17	FAM8A1
100689073	1.46e-15	2.39e-17	ARHGAP22-IT1
23731	1.52e-15	2.49e-17	TMEM245
4016	1.53e-15	2.51e-17	LOXL1
80183	1.54e-15	2.53e-17	RUBCNL
549	1.56e-15	2.57e-17	AUH
2331	1.6e-15	2.63e-17	FMOD
6693	1.62e-15	2.68e-17	SPN
4063	1.66e-15	2.75e-17	LY9
650368	1.67e-15	2.77e-17	TSSC2
3575	1.67e-15	2.78e-17	IL7R
11344	1.69e-15	2.82e-17	TWF2
100188988	1.72e-15	2.88e-17	TRH-GTG1-8
51291	1.74e-15	2.92e-17	GMIP
2982	1.81e-15	3.04e-17	GUCY1A1
102723444	2.01e-15	3.39e-17	LOC102723444
51284	2.01e-15	3.39e-17	TLR7
102723604	2.01e-15	3.4e-17	LOC102723604
5738	2.12e-15	3.59e-17	PTGFRN
9332	2.12e-15	3.59e-17	CD163
51422	2.2e-15	3.74e-17	PRKAG2
22982	2.2e-15	3.76e-17	DIP2C
22808	2.22e-15	3.8e-17	MRAS
6035	2.22e-15	3.8e-17	RNASE1
146206	2.22e-15	3.79e-17	CARMIL2
4605	2.39e-15	4.12e-17	MYBL2
107985949	2.43e-15	4.18e-17	LOC107985949
25939	2.46e-15	4.24e-17	SAMHD1
27154	2.48e-15	4.29e-17	BRPF3
9783	2.56e-15	4.44e-17	RIMS3
1233	2.58e-15	4.49e-17	CCR4
7837	2.65e-15	4.61e-17	PXDN
613038	2.66e-15	4.63e-17	LOC613038
23508	2.68e-15	4.68e-17	TTC9
26249	2.7e-15	4.72e-17	KLHL3
100129405	2.82e-15	4.94e-17	MSTO2P
54900	2.92e-15	5.14e-17	LAX1
302	2.97e-15	5.23e-17	ANXA2
4688	2.97e-15	5.24e-17	NCF2
27122	3.07e-15	5.43e-17	DKK3
3671	3.15e-15	5.58e-17	ISLR
107986761	3.17e-15	5.63e-17	LOC107986761
105370205	3.22e-15	5.73e-17	LOC105370205
9103	3.32e-15	5.93e-17	FCGR2C
9770	3.32e-15	5.92e-17	RASSF2
107985505	3.48e-15	6.24e-17	LOC107985505
51014	3.55e-15	6.37e-17	TMED7
8354	3.7e-15	6.65e-17	H3C11
89790	3.75e-15	6.75e-17	SIGLEC10
29128	3.77e-15	6.83e-17	UHRF1
57664	3.77e-15	6.83e-17	PLEKHA4
100506621	3.79e-15	6.87e-17	LINC01279
2681	3.83e-15	6.97e-17	GGTA1
51651	3.86e-15	7.03e-17	PTRH2
266675	3.92e-15	7.14e-17	BEST4
3797	4.01e-15	7.34e-17	KIF3C
4188	4.07e-15	7.45e-17	MDFI
7187	4.2e-15	7.72e-17	TRAF3
3681	4.44e-15	8.17e-17	ITGAD
79649	4.45e-15	8.2e-17	MAP7D3
3587	4.58e-15	8.45e-17	IL10RA
205717	4.7e-15	8.69e-17	USF3
6689	4.83e-15	8.95e-17	SPIB
107986476	4.93e-15	9.16e-17	LOC107986476
201799	4.97e-15	9.24e-17	TMEM154
3904	4.98e-15	9.28e-17	LAIR2
55253	5.05e-15	9.44e-17	TYW1
132243	5.05e-15	9.46e-17	H1-8
55088	5.09e-15	9.54e-17	CCDC186
23046	5.2e-15	9.79e-17	KIF21B
124402	5.57e-15	1.05e-16	UBALD1
101927070	5.7e-15	1.08e-16	LINC02611
30835	5.72e-15	1.08e-16	CD209
9124	5.76e-15	1.09e-16	PDLIM1
202309	5.81e-15	1.1e-16	GAPT
714	5.86e-15	1.12e-16	C1QC
5071	5.92e-15	1.13e-16	PRKN
283234	5.92e-15	1.13e-16	CCDC88B
1277	5.92e-15	1.13e-16	COL1A1
105378532	5.93e-15	1.14e-16	LOC105378532
55423	5.93e-15	1.14e-16	SIRPG
130951	6.01e-15	1.16e-16	M1AP
112268150	6.08e-15	1.17e-16	LOC112268150
3738	6.15e-15	1.19e-16	KCNA3
2829	6.18e-15	1.2e-16	XCR1
64839	6.22e-15	1.21e-16	FBXL17
7753	6.22e-15	1.21e-16	ZNF202
105371932	6.22e-15	1.21e-16	LOC105371932
9223	6.32e-15	1.23e-16	MAGI1
23327	6.35e-15	1.24e-16	NEDD4L
767	6.46e-15	1.26e-16	CA8
389119	6.66e-15	1.31e-16	INKA1
102723761	6.72e-15	1.32e-16	LINC02773
2649	6.89e-15	1.36e-16	NR6A1
90780	7.01e-15	1.38e-16	PYGO2
10071	7.07e-15	1.4e-16	MUC12
729683	7.11e-15	1.41e-16	LOC729683
10409	7.18e-15	1.42e-16	BASP1
145864	7.36e-15	1.46e-16	HAPLN3
79690	7.41e-15	1.48e-16	GAL3ST4
23239	7.65e-15	1.53e-16	PHLPP1
10728	8.29e-15	1.66e-16	PTGES3
8420	8.52e-15	1.7e-16	SNHG3
55707	8.53e-15	1.71e-16	NECAP2
60681	8.77e-15	1.76e-16	FKBP10
105379013	8.78e-15	1.77e-16	LOC105379013
2313	8.78e-15	1.77e-16	FLI1
79705	8.98e-15	1.81e-16	LRRK1
101927603	9.01e-15	1.82e-16	LOC101927603
2833	9.04e-15	1.83e-16	CXCR3
140947	9.14e-15	1.85e-16	DCANP1
83643	9.27e-15	1.89e-16	CCDC3
10418	9.33e-15	1.9e-16	SPON1
5777	9.36e-15	1.91e-16	PTPN6
105376591	9.59e-15	1.96e-16	LOC105376591
440823	9.67e-15	1.98e-16	MIAT
728841	9.71e-15	1.99e-16	NBPF8
219972	9.89e-15	2.03e-16	MPEG1
22846	1.01e-14	2.09e-16	VASH1
7732	1.01e-14	2.09e-16	RNF112
7903	1.02e-14	2.1e-16	ST8SIA4
56253	1.02e-14	2.1e-16	CRTAM
28622	1.05e-14	2.17e-16	TRBJ2-7
7162	1.13e-14	2.34e-16	TPBG
606724	1.16e-14	2.42e-16	LOC606724
112268447	1.18e-14	2.45e-16	LOC112268447
10381	1.18e-14	2.47e-16	TUBB3
4237	1.28e-14	2.67e-16	MFAP2
1439	1.29e-14	2.7e-16	CSF2RB
23768	1.3e-14	2.74e-16	FLRT2
105379752	1.35e-14	2.84e-16	LOC105379752
23102	1.39e-14	2.92e-16	TBC1D2B
353189	1.4e-14	2.96e-16	SLCO4C1
387104	1.42e-14	2.99e-16	SOGA3
285025	1.46e-14	3.08e-16	CCDC141
153830	1.46e-14	3.1e-16	RNF145
837	1.46e-14	3.1e-16	CASP4
64943	1.54e-14	3.27e-16	NT5DC2
940	1.54e-14	3.28e-16	CD28
2294	1.59e-14	3.38e-16	FOXF1
11314	1.7e-14	3.63e-16	CD300A
9729	1.72e-14	3.68e-16	KIAA0408
285555	1.73e-14	3.7e-16	STPG2
399	1.77e-14	3.79e-16	RHOH
10891	1.78e-14	3.83e-16	PPARGC1A
64838	1.82e-14	3.93e-16	FNDC4
100189168	1.82e-14	3.92e-16	TRR-CCT3-1
9843	1.82e-14	3.94e-16	HEPH
6974	1.87e-14	4.05e-16	TRGV2
1804	1.89e-14	4.1e-16	DPP6
203100	1.89e-14	4.1e-16	HTRA4
388242	1.94e-14	4.23e-16	LOC388242
8532	1.96e-14	4.27e-16	CPZ
3549	2e-14	4.36e-16	IHH
3574	2.01e-14	4.4e-16	IL7
107985573	2.01e-14	4.4e-16	LOC107985573
7535	2.05e-14	4.49e-16	ZAP70
57231	2.05e-14	4.51e-16	SNX14
54664	2.09e-14	4.59e-16	TMEM106B
645369	2.17e-14	4.78e-16	TMEM200C
81552	2.2e-14	4.85e-16	VOPP1
102723922	2.24e-14	4.95e-16	LOC102723922
23616	2.24e-14	4.96e-16	SH3BP1
641	2.29e-14	5.08e-16	BLM
4513	2.29e-14	5.07e-16	COX2
54751	2.3e-14	5.11e-16	FBLIM1
9881	2.34e-14	5.22e-16	TRANK1
79230	2.35e-14	5.24e-16	ZNF557
100189245	2.35e-14	5.26e-16	TRT-CGT4-1
64786	2.37e-14	5.3e-16	TBC1D15
25837	2.38e-14	5.34e-16	RAB26
101593348	2.4e-14	5.38e-16	LOC101593348
3624	2.42e-14	5.45e-16	INHBA
133418	2.5e-14	5.64e-16	EMB
83706	2.7e-14	6.09e-16	FERMT3
221687	2.8e-14	6.33e-16	RNF182
64225	2.89e-14	6.55e-16	ATL2
2014	3.03e-14	6.87e-16	EMP3
5918	3.14e-14	7.12e-16	RARRES1
924	3.15e-14	7.17e-16	CD7
55771	3.19e-14	7.27e-16	PRR11
655	3.24e-14	7.38e-16	BMP7
83468	3.27e-14	7.47e-16	GLT8D2
160622	3.33e-14	7.6e-16	TAMALIN
54854	3.4e-14	7.79e-16	FAM83E
4567	3.52e-14	8.07e-16	TRNL1
2118	3.57e-14	8.23e-16	ETV4
81030	3.57e-14	8.23e-16	ZBP1
147495	3.62e-14	8.35e-16	APCDD1
23095	3.69e-14	8.53e-16	KIF1B
5166	3.72e-14	8.61e-16	PDK4
3603	3.81e-14	8.84e-16	IL16
90874	3.88e-14	9.01e-16	ZNF697
10877	4e-14	9.31e-16	CFHR4
6282	4.04e-14	9.42e-16	S100A11
2903	4.05e-14	9.46e-16	GRIN2A
946	4.1e-14	9.59e-16	SIGLEC6
3363	4.11e-14	9.61e-16	HTR7
2212	4.19e-14	9.84e-16	FCGR2A
23231	4.19e-14	9.82e-16	SEL1L3
107984338	4.31e-14	1.01e-15	LOC107984338
202018	4.31e-14	1.02e-15	TAPT1
79834	4.35e-14	1.03e-15	PEAK1
107984965	4.39e-14	1.04e-15	LOC107984965
25903	4.39e-14	1.04e-15	OLFML2B
4301	4.39e-14	1.04e-15	AFDN
150368	4.43e-14	1.05e-15	PHETA2
3304	4.45e-14	1.06e-15	HSPA1B
150771	4.49e-14	1.07e-15	ITPRIPL1
4068	4.49e-14	1.07e-15	SH2D1A
3303	4.66e-14	1.11e-15	HSPA1A
91442	4.69e-14	1.12e-15	FAAP24
105377113	4.84e-14	1.16e-15	LOC105377113
54622	4.95e-14	1.19e-15	ARL15
9938	5.02e-14	1.21e-15	ARHGAP25
374443	5.02e-14	1.2e-15	LOC374443
6322	5.02e-14	1.21e-15	SCML1
1606	5.16e-14	1.24e-15	DGKA
1950	5.42e-14	1.31e-15	EGF
112267910	5.42e-14	1.31e-15	LOC112267910
9645	5.45e-14	1.32e-15	MICAL2
6372	5.47e-14	1.33e-15	CXCL6
256435	5.49e-14	1.33e-15	ST6GALNAC3
256236	5.55e-14	1.35e-15	NAPSB
3764	5.69e-14	1.39e-15	KCNJ8
23313	5.75e-14	1.41e-15	KIAA0930
23612	5.8e-14	1.42e-15	PHLDA3
55614	5.8e-14	1.42e-15	KIF16B
105371464	5.82e-14	1.43e-15	LOC105371464
8814	5.82e-14	1.43e-15	CDKL1
160418	5.86e-14	1.45e-15	TMTC3
7114	6.14e-14	1.52e-15	TMSB4X
10870	6.16e-14	1.52e-15	HCST
80218	6.18e-14	1.53e-15	NAA50
9908	6.19e-14	1.54e-15	G3BP2
10768	6.29e-14	1.57e-15	AHCYL1
116285	6.29e-14	1.57e-15	ACSM1
51592	6.31e-14	1.58e-15	TRIM33
4519	6.39e-14	1.6e-15	CYTB
6311	6.4e-14	1.6e-15	ATXN2
375341	6.43e-14	1.61e-15	C3orf62
440434	6.44e-14	1.62e-15	NPEPPSP1
25966	6.46e-14	1.63e-15	C2CD2
112268467	6.59e-14	1.66e-15	LOC112268467
10112	6.61e-14	1.67e-15	KIF20A
28996	6.64e-14	1.68e-15	HIPK2
10906	6.67e-14	1.69e-15	TRAFD1
28677	6.71e-14	1.7e-15	TRAV9-2
8336	6.75e-14	1.72e-15	H2AC17
105375422	6.75e-14	1.71e-15	LOC105375422
65065	6.96e-14	1.77e-15	NBEAL1
101927943	7.2e-14	1.84e-15	SETBP1-DT
22995	7.24e-14	1.85e-15	CEP152
257019	7.27e-14	1.86e-15	FRMD3
22941	7.27e-14	1.86e-15	SHANK2
4481	7.35e-14	1.88e-15	MSR1
84952	7.43e-14	1.91e-15	CGNL1
81553	7.51e-14	1.93e-15	CYRIA
115273	7.68e-14	1.98e-15	RAB42
51701	7.68e-14	1.98e-15	NLK
51393	7.7e-14	1.99e-15	TRPV2
26147	7.87e-14	2.03e-15	PHF19
55911	7.96e-14	2.06e-15	APOBR
50861	7.96e-14	2.06e-15	STMN3
56605	7.97e-14	2.07e-15	ERO1B
6363	8.25e-14	2.15e-15	CCL19
5791	8.25e-14	2.14e-15	PTPRE
167410	8.51e-14	2.22e-15	LIX1
5452	8.63e-14	2.25e-15	POU2F2
5008	8.65e-14	2.26e-15	OSM
65125	8.9e-14	2.33e-15	WNK1
22902	8.94e-14	2.34e-15	RUFY3
121512	9e-14	2.36e-15	FGD4
100189086	9.72e-14	2.55e-15	TRT-CGT2-1
28567	9.77e-14	2.57e-15	TRBV20-1
60558	9.84e-14	2.59e-15	GUF1
79734	9.88e-14	2.6e-15	KCTD17
259307	1.02e-13	2.69e-15	IL4I1
105375942	1.04e-13	2.75e-15	LOC105375942
1524	1.06e-13	2.79e-15	CX3CR1
9063	1.07e-13	2.84e-15	PIAS2
6503	1.09e-13	2.91e-15	SLA
64651	1.1e-13	2.93e-15	CSRNP1
51279	1.1e-13	2.94e-15	C1RL
91614	1.11e-13	2.97e-15	DEPDC7
285195	1.11e-13	2.98e-15	SLC9A9
64919	1.12e-13	2.99e-15	BCL11B
105377112	1.12e-13	3.01e-15	LOC105377112
284367	1.17e-13	3.15e-15	SIGLEC17P
29121	1.21e-13	3.25e-15	CLEC2D
93349	1.21e-13	3.26e-15	SP140L
84171	1.24e-13	3.34e-15	LOXL4
55291	1.25e-13	3.38e-15	PPP6R3
864	1.26e-13	3.4e-15	RUNX3
6844	1.26e-13	3.42e-15	VAMP2
3718	1.27e-13	3.43e-15	JAK3
8065	1.28e-13	3.47e-15	CUL5
2359	1.31e-13	3.56e-15	FPR3
6004	1.33e-13	3.61e-15	RGS16
57670	1.35e-13	3.68e-15	KIAA1549
57452	1.35e-13	3.68e-15	GALNT16
55333	1.35e-13	3.68e-15	SYNJ2BP
1675	1.35e-13	3.69e-15	CFD
26191	1.36e-13	3.72e-15	PTPN22
3009	1.37e-13	3.75e-15	H1-5
57613	1.38e-13	3.78e-15	FAM234B
5290	1.4e-13	3.85e-15	PIK3CA
27350	1.4e-13	3.86e-15	APOBEC3C
2735	1.42e-13	3.91e-15	GLI1
23643	1.47e-13	4.07e-15	LY96
2254	1.47e-13	4.07e-15	FGF9
4920	1.49e-13	4.11e-15	ROR2
139322	1.5e-13	4.16e-15	APOOL
101929241	1.53e-13	4.25e-15	LINC02325
51155	1.53e-13	4.27e-15	JPT1
973	1.53e-13	4.27e-15	CD79A
7422	1.55e-13	4.31e-15	VEGFA
107984590	1.55e-13	4.33e-15	LOC107984590
25927	1.6e-13	4.47e-15	CNRIP1
1306	1.6e-13	4.48e-15	COL15A1
389643	1.62e-13	4.54e-15	NUGGC
160364	1.71e-13	4.82e-15	CLEC12A
283349	1.71e-13	4.82e-15	RASSF3
4542	1.8e-13	5.06e-15	MYO1F
100189030	1.85e-13	5.21e-15	TRE-TTC2-1
27109	1.87e-13	5.28e-15	DMAC2L
165631	1.87e-13	5.29e-15	PARP15
3588	1.88e-13	5.33e-15	IL10RB
11182	1.89e-13	5.35e-15	SLC2A6
401097	1.91e-13	5.42e-15	C3orf80
3676	1.92e-13	5.46e-15	ITGA4
841	1.92e-13	5.47e-15	CASP8
144535	1.96e-13	5.58e-15	CFAP54
5912	2.05e-13	5.84e-15	RAP2B
28666	2.05e-13	5.84e-15	TRAV17
9051	2.06e-13	5.9e-15	PSTPIP1
140767	2.09e-13	5.99e-15	NRSN1
2205	2.09e-13	6.01e-15	FCER1A
7337	2.18e-13	6.27e-15	UBE3A
105369652	2.25e-13	6.46e-15	LINC02390
84174	2.25e-13	6.47e-15	SLA2
718	2.31e-13	6.66e-15	C3
10673	2.31e-13	6.69e-15	TNFSF13B
51311	2.35e-13	6.8e-15	TLR8
3689	2.35e-13	6.81e-15	ITGB2
58191	2.36e-13	6.86e-15	CXCL16
105375889	2.38e-13	6.92e-15	LOC105375889
7226	2.45e-13	7.12e-15	TRPM2
116496	2.45e-13	7.14e-15	NIBAN1
50853	2.48e-13	7.23e-15	VILL
653567	2.52e-13	7.36e-15	TMEM236
26507	2.52e-13	7.37e-15	CNNM1
5586	2.56e-13	7.5e-15	PKN2
9750	2.56e-13	7.49e-15	RIPOR2
140564	2.56e-13	7.51e-15	APOBEC3D
8092	2.61e-13	7.67e-15	ALX1
5698	2.64e-13	7.77e-15	PSMB9
105375787	2.64e-13	7.77e-15	LOC105375787
80709	2.64e-13	7.79e-15	AKNA
145820	2.67e-13	7.9e-15	LINC00924
27324	2.68e-13	7.92e-15	TOX3
2252	2.7e-13	7.99e-15	FGF7
9232	2.75e-13	8.16e-15	PTTG1
102724765	2.75e-13	8.15e-15	LOC102724765
387032	2.75e-13	8.14e-15	ZKSCAN4
22875	2.8e-13	8.34e-15	ENPP4
4318	2.8e-13	8.35e-15	MMP9
54805	2.84e-13	8.48e-15	CNNM2
79809	2.87e-13	8.57e-15	TTC21B
117289	2.9e-13	8.66e-15	TAGAP
22878	2.99e-13	8.95e-15	TRAPPC8
1902	3.05e-13	9.12e-15	LPAR1
100129316	3.05e-13	9.14e-15	LOC100129316
1043	3.07e-13	9.22e-15	CD52
343413	3.08e-13	9.27e-15	FCRL6
26509	3.09e-13	9.3e-15	MYOF
54209	3.1e-13	9.35e-15	TREM2
63940	3.11e-13	9.37e-15	GPSM3
920	3.14e-13	9.48e-15	CD4
1236	3.14e-13	9.5e-15	CCR7
2769	3.19e-13	9.66e-15	GNA15
284756	3.19e-13	9.68e-15	LINC02910
100189385	3.2e-13	9.72e-15	TRE-CTC1-3
107984546	3.21e-13	9.75e-15	LOC107984546
10871	3.23e-13	9.84e-15	CD300C
59345	3.26e-13	9.93e-15	GNB4
9448	3.36e-13	1.03e-14	MAP4K4
942	3.4e-13	1.04e-14	CD86
79415	3.4e-13	1.04e-14	CYBC1
861	3.42e-13	1.05e-14	RUNX1
10346	3.47e-13	1.06e-14	TRIM22
6558	3.48e-13	1.07e-14	SLC12A2
339524	3.51e-13	1.08e-14	LINC01140
11022	3.51e-13	1.08e-14	TDRKH
5027	3.64e-13	1.12e-14	P2RX7
5729	3.64e-13	1.12e-14	PTGDR
241	3.69e-13	1.14e-14	ALOX5AP
80003	3.72e-13	1.15e-14	PCNX2
83742	3.79e-13	1.17e-14	MARVELD1
114769	3.87e-13	1.2e-14	CARD16
4288	3.88e-13	1.2e-14	MKI67
105374890	3.91e-13	1.21e-14	LOC105374890
653483	3.94e-13	1.23e-14	AFDN-DT
9111	3.96e-13	1.23e-14	NMI
23443	3.96e-13	1.23e-14	SLC35A3
79668	4e-13	1.25e-14	PARP8
6793	4.06e-13	1.27e-14	STK10
112935892	4.08e-13	1.27e-14	LINC02605
64170	4.15e-13	1.3e-14	CARD9
79883	4.15e-13	1.3e-14	PODNL1
29015	4.18e-13	1.31e-14	SLC43A3
4222	4.18e-13	1.31e-14	MEOX1
10220	4.18e-13	1.32e-14	GDF11
102724632	4.24e-13	1.34e-14	LOC102724632
79865	4.25e-13	1.34e-14	TREML2
27330	4.32e-13	1.37e-14	RPS6KA6
80315	4.47e-13	1.42e-14	CPEB4
56978	4.49e-13	1.42e-14	PRDM8
146433	4.54e-13	1.44e-14	IL34
2643	4.54e-13	1.44e-14	GCH1
3075	4.56e-13	1.45e-14	CFH
81793	4.56e-13	1.45e-14	TLR10
3122	4.56e-13	1.45e-14	HLA-DRA
115352	4.59e-13	1.46e-14	FCRL3
126259	4.61e-13	1.47e-14	TMIGD2
80342	4.62e-13	1.48e-14	TRAF3IP3
22852	4.62e-13	1.48e-14	ANKRD26
105371022	4.67e-13	1.5e-14	LOC105371022
8317	4.72e-13	1.51e-14	CDC7
1657	4.74e-13	1.52e-14	DMXL1
5368	4.76e-13	1.53e-14	PNOC
79713	4.83e-13	1.55e-14	IGFLR1
107985263	4.88e-13	1.57e-14	LOC107985263
116224	4.94e-13	1.6e-14	PABIR1
90381	5.1e-13	1.65e-14	TICRR
105370993	5.33e-13	1.72e-14	LOC105370993
4332	5.38e-13	1.74e-14	MNDA
23014	5.38e-13	1.74e-14	FBXO21
152789	5.51e-13	1.79e-14	JAKMIP1
27334	5.52e-13	1.79e-14	P2RY10
55671	5.59e-13	1.82e-14	PPP4R3A
8986	5.64e-13	1.84e-14	RPS6KA4
53829	5.73e-13	1.87e-14	P2RY13
389432	5.75e-13	1.88e-14	SAMD5
80854	5.77e-13	1.89e-14	SETD7
6001	5.78e-13	1.89e-14	RGS10
30009	5.83e-13	1.91e-14	TBX21
284611	5.84e-13	1.91e-14	EEIG2
2788	5.89e-13	1.93e-14	GNG7
26054	5.91e-13	1.94e-14	SENP6
80765	6.07e-13	2e-14	STARD5
8969	6.08e-13	2e-14	H2AC11
105375366	6.1e-13	2.01e-14	LOC105375366
107986018	6.13e-13	2.02e-14	LOC107986018
286827	6.23e-13	2.06e-14	TRIM59
122786	6.34e-13	2.1e-14	FRMD6
959	6.48e-13	2.15e-14	CD40LG
2797	6.51e-13	2.16e-14	GNRH2
1269	6.59e-13	2.19e-14	CNR2
7163	6.79e-13	2.26e-14	TPD52
101928816	6.8e-13	2.26e-14	LOC101928816
5318	6.8e-13	2.27e-14	PKP2
7049	6.85e-13	2.29e-14	TGFBR3
135398	6.9e-13	2.31e-14	C6orf141
10123	6.98e-13	2.34e-14	ARL4C
7846	6.99e-13	2.34e-14	TUBA1A
8635	7.02e-13	2.35e-14	RNASET2
1359	7.08e-13	2.38e-14	CPA3
338667	7.13e-13	2.4e-14	VSIG10L2
136051	7.19e-13	2.42e-14	ZNF786
101926964	7.27e-13	2.46e-14	LOC101926964
112267936	7.27e-13	2.45e-14	LOC112267936
78990	7.27e-13	2.45e-14	OTUB2
256646	7.27e-13	2.45e-14	NUTM1
259197	7.64e-13	2.59e-14	NCR3
653361	7.64e-13	2.58e-14	NCF1
54941	7.64e-13	2.58e-14	RNF125
112268222	7.64e-13	2.59e-14	LOC112268222
944	7.75e-13	2.63e-14	TNFSF8
113130	7.81e-13	2.66e-14	CDCA5
107985137	7.94e-13	2.7e-14	LOC107985137
109864282	8.04e-13	2.74e-14	RNA28SN2
100505702	8.06e-13	2.75e-14	LINC01094
107984850	8.08e-13	2.76e-14	LOC107984850
105373063	8.36e-13	2.86e-14	LOC105373063
9844	8.55e-13	2.92e-14	ELMO1
5355	8.59e-13	2.94e-14	PLP2
126364	8.62e-13	2.96e-14	LRRC25
57559	8.67e-13	2.98e-14	STAMBPL1
4603	8.83e-13	3.04e-14	MYBL1
2274	8.96e-13	3.08e-14	FHL2
57515	9.03e-13	3.11e-14	SERINC1
113452	9.12e-13	3.14e-14	TMEM54
79609	9.12e-13	3.15e-14	VCPKMT
51816	9.19e-13	3.17e-14	ADA2
9019	9.22e-13	3.19e-14	MPZL1
23017	9.33e-13	3.23e-14	FAIM2
3965	9.49e-13	3.29e-14	LGALS9
2571	9.5e-13	3.3e-14	GAD1
9891	9.53e-13	3.31e-14	NUAK1
523	9.7e-13	3.37e-14	ATP6V1A
440603	9.75e-13	3.39e-14	BCL2L15
102723475	9.76e-13	3.4e-14	LOC102723475
23074	9.81e-13	3.42e-14	BLTP3B
8368	9.84e-13	3.44e-14	H4C13
57758	9.84e-13	3.44e-14	SCUBE2
102724378	9.89e-13	3.46e-14	LOC102724378
7450	1.02e-12	3.58e-14	VWF
6999	1.02e-12	3.59e-14	TDO2
107984671	1.02e-12	3.59e-14	LOC107984671
4323	1.02e-12	3.6e-14	MMP14
3635	1.02e-12	3.6e-14	INPP5D
9043	1.04e-12	3.68e-14	SPAG9
4773	1.05e-12	3.72e-14	NFATC2
974	1.08e-12	3.8e-14	CD79B
84446	1.09e-12	3.86e-14	BRSK1
107986779	1.1e-12	3.88e-14	LOC107986779
143458	1.11e-12	3.93e-14	LDLRAD3
101927272	1.12e-12	3.96e-14	LOC101927272
304	1.13e-12	3.99e-14	ANXA2P2
1945	1.13e-12	4.03e-14	EFNA4
133746	1.13e-12	4.02e-14	JMY
107984391	1.13e-12	4.03e-14	LOC107984391
10317	1.14e-12	4.06e-14	B3GALT5
170850	1.17e-12	4.18e-14	KCNG3
8200	1.18e-12	4.2e-14	GDF5
7476	1.18e-12	4.22e-14	WNT7A
107986786	1.18e-12	4.23e-14	LOC107986786
101928263	1.19e-12	4.24e-14	LOC101928263
6095	1.19e-12	4.26e-14	RORA
51339	1.19e-12	4.29e-14	DACT1
705	1.2e-12	4.32e-14	BYSL
112268296	1.2e-12	4.33e-14	LOC112268296
6654	1.22e-12	4.39e-14	SOS1
2529	1.23e-12	4.41e-14	FUT7
11006	1.24e-12	4.45e-14	LILRB4
58475	1.24e-12	4.48e-14	MS4A7
54502	1.25e-12	4.51e-14	RBM47
10695	1.27e-12	4.6e-14	CNPY3
1104	1.3e-12	4.69e-14	RCC1
91683	1.3e-12	4.7e-14	SYT12
8165	1.3e-12	4.7e-14	AKAP1
9688	1.3e-12	4.73e-14	NUP93
27333	1.3e-12	4.74e-14	GOLIM4
81031	1.31e-12	4.77e-14	SLC2A10
22978	1.35e-12	4.91e-14	NT5C2
151742	1.35e-12	4.93e-14	PPM1L
105375244	1.35e-12	4.93e-14	LOC105375244
4320	1.36e-12	4.96e-14	MMP11
100507206	1.41e-12	5.15e-14	LINC00943
162394	1.42e-12	5.19e-14	SLFN5
55788	1.42e-12	5.21e-14	LMBRD1
2634	1.45e-12	5.32e-14	GBP2
79940	1.45e-12	5.33e-14	LINC00472
400746	1.46e-12	5.38e-14	NCMAP
51363	1.47e-12	5.39e-14	CHST15
23011	1.5e-12	5.5e-14	RAB21
7454	1.5e-12	5.51e-14	WAS
257397	1.52e-12	5.6e-14	TAB3
80153	1.53e-12	5.63e-14	EDC3
81035	1.55e-12	5.74e-14	COLEC12
80350	1.56e-12	5.76e-14	LPAL2
139716	1.57e-12	5.82e-14	GAB3
50939	1.6e-12	5.91e-14	IMPG2
150	1.6e-12	5.94e-14	ADRA2A
105370500	1.62e-12	6.03e-14	LOC105370500
105376106	1.63e-12	6.07e-14	LOC105376106
101930421	1.64e-12	6.11e-14	LOC101930421
51192	1.64e-12	6.11e-14	CKLF
105375913	1.66e-12	6.2e-14	LOC105375913
155435	1.68e-12	6.25e-14	RBM33
84941	1.68e-12	6.28e-14	HSH2D
22914	1.71e-12	6.37e-14	KLRK1
100507171	1.72e-12	6.43e-14	BOLA3-DT
112268144	1.78e-12	6.67e-14	LOC112268144
107984871	1.78e-12	6.67e-14	LOC107984871
114548	1.8e-12	6.73e-14	NLRP3
11027	1.83e-12	6.88e-14	LILRA2
80304	1.87e-12	7.04e-14	WDCP
29851	1.87e-12	7.05e-14	ICOS
11015	1.88e-12	7.07e-14	KDELR3
5156	1.88e-12	7.08e-14	PDGFRA
440026	1.89e-12	7.14e-14	TMEM41B
107984740	1.91e-12	7.21e-14	LOC107984740
713	1.93e-12	7.3e-14	C1QB
4256	1.96e-12	7.4e-14	MGP
4690	1.98e-12	7.51e-14	NCK1
645191	1.98e-12	7.52e-14	LINGO3
101927086	2e-12	7.6e-14	KLF9-DT
101927723	2.01e-12	7.64e-14	LOC101927723
107984583	2.01e-12	7.65e-14	LOC107984583
11227	2.02e-12	7.7e-14	GALNT5
11200	2.02e-12	7.69e-14	CHEK2
26999	2.05e-12	7.82e-14	CYFIP2
7177	2.06e-12	7.86e-14	TPSAB1
64710	2.07e-12	7.92e-14	NUCKS1
4602	2.07e-12	7.93e-14	MYB
7480	2.11e-12	8.08e-14	WNT10B
6509	2.12e-12	8.11e-14	SLC1A4
129293	2.12e-12	8.15e-14	TRABD2A
8303	2.13e-12	8.19e-14	SNN
611	2.16e-12	8.31e-14	OPN1SW
2323	2.18e-12	8.4e-14	FLT3LG
143903	2.2e-12	8.49e-14	LAYN
4548	2.23e-12	8.61e-14	MTR
9868	2.24e-12	8.64e-14	TOMM70
100303453	2.24e-12	8.65e-14	TSNAX-DISC1
55161	2.28e-12	8.82e-14	TMEM33
124	2.28e-12	8.82e-14	ADH1A
10254	2.28e-12	8.85e-14	STAM2
6352	2.29e-12	8.88e-14	CCL5
5151	2.29e-12	8.9e-14	PDE8A
5199	2.29e-12	8.9e-14	CFP
990	2.35e-12	9.12e-14	CDC6
107984957	2.4e-12	9.36e-14	LINC02812
105373925	2.42e-12	9.43e-14	LOC105373925
1289	2.43e-12	9.5e-14	COL5A1
8356	2.46e-12	9.6e-14	H3C12
22821	2.47e-12	9.66e-14	RASA3
9244	2.47e-12	9.68e-14	CRLF1
10110	2.56e-12	1e-13	SGK2
930	2.59e-12	1.01e-13	CD19
283316	2.59e-12	1.02e-13	CD163L1
107985217	2.6e-12	1.02e-13	LOC107985217
1307	2.61e-12	1.03e-13	COL16A1
3827	2.61e-12	1.03e-13	KNG1
100528032	2.63e-12	1.04e-13	KLRC4-KLRK1
3475	2.64e-12	1.04e-13	IFRD1
1594	2.67e-12	1.05e-13	CYP27B1
3709	2.67e-12	1.06e-13	ITPR2
151888	2.73e-12	1.08e-13	BTLA
83903	2.73e-12	1.08e-13	HASPIN
91607	2.74e-12	1.08e-13	SLFN11
939	2.76e-12	1.1e-13	CD27
10735	2.76e-12	1.1e-13	STAG2
84918	2.79e-12	1.11e-13	LRP11
25789	2.83e-12	1.13e-13	TMEM59L
105371242	2.84e-12	1.13e-13	PPIAL4H
105375532	2.84e-12	1.13e-13	LOC105375532
57494	2.94e-12	1.17e-13	RIMKLB
64398	2.96e-12	1.18e-13	PALS1
401124	3.01e-12	1.2e-13	DTHD1
3269	3.02e-12	1.21e-13	HRH1
7941	3.03e-12	1.21e-13	PLA2G7
101928228	3.05e-12	1.22e-13	LOC101928228
123041	3.1e-12	1.25e-13	SLC24A4
164	3.11e-12	1.25e-13	AP1G1
65244	3.11e-12	1.25e-13	SPATS2
119	3.11e-12	1.25e-13	ADD2
8038	3.11e-12	1.25e-13	ADAM12
5778	3.2e-12	1.29e-13	PTPN7
105371475	3.2e-12	1.29e-13	LOC105371475
343578	3.22e-12	1.3e-13	ARHGAP40
93663	3.29e-12	1.33e-13	ARHGAP18
112267970	3.33e-12	1.35e-13	LOC112267970
123722	3.35e-12	1.36e-13	FSD2
7124	3.36e-12	1.36e-13	TNF
284348	3.36e-12	1.36e-13	LYPD5
91452	3.4e-12	1.38e-13	ACBD5
102724584	3.4e-12	1.39e-13	LOC102724584
3181	3.43e-12	1.4e-13	HNRNPA2B1
64108	3.44e-12	1.4e-13	RTP4
55681	3.5e-12	1.43e-13	SCYL2
63979	3.51e-12	1.43e-13	FIGNL1
10529	3.51e-12	1.43e-13	NEBL
162073	3.53e-12	1.44e-13	ITPRIPL2
55435	3.59e-12	1.47e-13	AP1AR
4818	3.6e-12	1.47e-13	NKG7
1041	3.62e-12	1.49e-13	CDSN
9509	3.66e-12	1.5e-13	ADAMTS2
6382	3.69e-12	1.51e-13	SDC1
51514	3.71e-12	1.53e-13	DTL
286006	3.73e-12	1.54e-13	LSMEM1
118987	3.74e-12	1.54e-13	PDZD8
65108	3.82e-12	1.58e-13	MARCKSL1
79789	3.91e-12	1.61e-13	CLMN
91584	3.95e-12	1.63e-13	PLXNA4
3727	3.97e-12	1.64e-13	JUND
7579	3.97e-12	1.65e-13	ZSCAN20
7153	3.97e-12	1.65e-13	TOP2A
26278	4.04e-12	1.67e-13	SACS
3275	4.06e-12	1.68e-13	PRMT2
29765	4.06e-12	1.69e-13	TMOD4
55296	4.1e-12	1.71e-13	TBC1D19
3115	4.15e-12	1.73e-13	HLA-DPB1
9535	4.2e-12	1.75e-13	GMFG
6976	4.21e-12	1.76e-13	TRGV3
28626	4.33e-12	1.81e-13	TRBJ2-3
925	4.35e-12	1.82e-13	CD8A
5885	4.38e-12	1.83e-13	RAD21
285605	4.41e-12	1.84e-13	DTWD2
100499489	4.43e-12	1.86e-13	LINC03027
348093	4.57e-12	1.91e-13	RBPMS2
79772	4.72e-12	1.98e-13	MCTP1
2744	4.72e-12	1.98e-13	GLS
5118	4.79e-12	2.01e-13	PCOLCE
11120	4.81e-12	2.03e-13	BTN2A1
81618	4.82e-12	2.03e-13	ITM2C
8867	4.87e-12	2.05e-13	SYNJ1
23530	4.88e-12	2.06e-13	NNT
3753	4.91e-12	2.07e-13	KCNE1
414152	5.03e-12	2.13e-13	C10orf105
375449	5.07e-12	2.14e-13	MAST4
991	5.08e-12	2.15e-13	CDC20
107986699	5.12e-12	2.17e-13	LOC107986699
10460	5.13e-12	2.17e-13	TACC3
161514	5.16e-12	2.19e-13	TBC1D21
4593	5.26e-12	2.23e-13	MUSK
5926	5.42e-12	2.3e-13	ARID4A
85236	5.43e-12	2.31e-13	H2BC12
339344	5.44e-12	2.31e-13	MYPOP
64785	5.5e-12	2.34e-13	GINS3
5790	5.56e-12	2.37e-13	PTPRCAP
5962	5.59e-12	2.39e-13	RDX
3820	5.62e-12	2.4e-13	KLRB1
55233	5.64e-12	2.41e-13	MOB1A
5189	5.65e-12	2.42e-13	PEX1
101928361	5.67e-12	2.43e-13	LOC101928361
10060	5.74e-12	2.46e-13	ABCC9
79930	5.74e-12	2.46e-13	DOK3
5993	5.77e-12	2.47e-13	RFX5
11064	5.79e-12	2.49e-13	CNTRL
5743	5.82e-12	2.5e-13	PTGS2
654817	5.84e-12	2.51e-13	NCF1C
84951	5.86e-12	2.52e-13	TNS4
55076	5.86e-12	2.53e-13	TMEM45A
105378516	5.87e-12	2.53e-13	LINC02930
27180	5.88e-12	2.54e-13	SIGLEC9
107986521	5.91e-12	2.56e-13	MFSD4B-DT
80119	5.99e-12	2.59e-13	PIF1
79156	6.06e-12	2.63e-13	PLEKHF1
9527	6.13e-12	2.65e-13	GOSR1
3108	6.2e-12	2.69e-13	HLA-DMA
4837	6.22e-12	2.7e-13	NNMT
921	6.24e-12	2.71e-13	CD5
6307	6.26e-12	2.72e-13	MSMO1
321	6.34e-12	2.76e-13	APBA2
3687	6.38e-12	2.78e-13	ITGAX
3737	6.43e-12	2.81e-13	KCNA2
6973	6.43e-12	2.8e-13	TRGV1
105374083	6.45e-12	2.82e-13	LOC105374083
343450	6.46e-12	2.83e-13	KCNT2
10618	6.47e-12	2.83e-13	TGOLN2
22931	6.47e-12	2.83e-13	RAB18
79444	6.51e-12	2.85e-13	BIRC7
54462	6.52e-12	2.86e-13	CCSER2
100507055	6.59e-12	2.9e-13	LRCOL1
391	6.62e-12	2.91e-13	RHOG
9047	6.73e-12	2.96e-13	SH2D2A
23764	6.74e-12	2.97e-13	MAFF
100505881	6.85e-12	3.02e-13	MAGI2-AS3
56940	6.95e-12	3.06e-13	DUSP22
2674	6.95e-12	3.06e-13	GFRA1
11245	7.14e-12	3.15e-13	GPR176
10170	7.16e-12	3.16e-13	DHRS9
8358	7.17e-12	3.17e-13	H3C2
9290	7.21e-12	3.19e-13	GPR55
1511	7.21e-12	3.19e-13	CTSG
1290	7.24e-12	3.21e-13	COL5A2
7869	7.28e-12	3.23e-13	SEMA3B
5376	7.3e-12	3.24e-13	PMP22
89822	7.34e-12	3.26e-13	KCNK17
347454	7.38e-12	3.28e-13	SOWAHD
89795	7.38e-12	3.29e-13	NAV3
114902	7.39e-12	3.29e-13	C1QTNF5
83552	7.39e-12	3.29e-13	MFRP
8355	7.42e-12	3.31e-13	H3C8
6604	7.42e-12	3.31e-13	SMARCD3
5271	7.48e-12	3.35e-13	SERPINB8
970	7.48e-12	3.35e-13	CD70
7218	7.68e-12	3.44e-13	TRP-AGG2-6
23219	7.7e-12	3.45e-13	FBXO28
10659	7.79e-12	3.49e-13	CELF2
54762	7.88e-12	3.54e-13	GRAMD1C
340719	7.9e-12	3.55e-13	NANOS1
752	8.2e-12	3.69e-13	FMNL1
7533	8.22e-12	3.7e-13	YWHAH
375387	8.22e-12	3.7e-13	NRROS
126375	8.46e-12	3.81e-13	ZNF792
8507	8.53e-12	3.85e-13	ENC1
10878	8.64e-12	3.9e-13	CFHR3
137735	8.7e-12	3.93e-13	ABRA
102724048	8.78e-12	3.97e-13	LOC102724048
150221	8.8e-12	3.98e-13	RIMBP3C
1438	8.91e-12	4.04e-13	CSF2RA
122618	8.95e-12	4.06e-13	PLD4
8313	8.97e-12	4.07e-13	AXIN2
54490	8.97e-12	4.08e-13	UGT2B28
5696	9e-12	4.09e-13	PSMB8
10388	9.03e-12	4.11e-13	SYCP2
57569	9.08e-12	4.13e-13	ARHGAP20
28620	9.09e-12	4.14e-13	TRBV2
7157	9.1e-12	4.15e-13	TP53
8082	9.15e-12	4.18e-13	SSPN
6737	9.24e-12	4.22e-13	TRIM21
54361	9.26e-12	4.23e-13	WNT4
65061	9.26e-12	4.24e-13	CDK15
150372	9.52e-12	4.36e-13	NFAM1
1803	9.58e-12	4.39e-13	DPP4
53346	9.67e-12	4.44e-13	TM6SF1
92241	9.75e-12	4.47e-13	RCSD1
83593	9.83e-12	4.51e-13	RASSF5
641384	9.86e-12	4.53e-13	LINC02912
27124	9.88e-12	4.54e-13	INPP5J
28583	9.99e-12	4.6e-13	TRBV10-3
112268093	9.99e-12	4.6e-13	LOC112268093
139818	1.02e-11	4.69e-13	DOCK11
149628	1.03e-11	4.77e-13	PYHIN1
9871	1.03e-11	4.77e-13	SEC24D
107986080	1.03e-11	4.78e-13	LOC107986080
178	1.04e-11	4.79e-13	AGL
64376	1.04e-11	4.79e-13	IKZF5
9360	1.04e-11	4.84e-13	PPIG
10644	1.06e-11	4.9e-13	IGF2BP2
3311	1.06e-11	4.9e-13	HSPA7
79172	1.06e-11	4.92e-13	CENPO
5999	1.07e-11	4.96e-13	RGS4
23493	1.07e-11	4.97e-13	HEY2
105371461	1.08e-11	5.01e-13	LOC105371461
137835	1.09e-11	5.08e-13	TMEM71
133396	1.09e-11	5.09e-13	IL31RA
80231	1.09e-11	5.09e-13	TASL
105374989	1.1e-11	5.14e-13	LOC105374989
2206	1.12e-11	5.22e-13	MS4A2
102724714	1.12e-11	5.25e-13	LINC01857
4779	1.13e-11	5.29e-13	NFE2L1
7351	1.14e-11	5.32e-13	UCP2
3112	1.14e-11	5.36e-13	HLA-DOB
28631	1.15e-11	5.39e-13	TRBJ1-5
10128	1.17e-11	5.49e-13	LRPPRC
115362	1.18e-11	5.55e-13	GBP5
79805	1.19e-11	5.58e-13	VASH2
64131	1.19e-11	5.6e-13	XYLT1
1063	1.2e-11	5.63e-13	CENPF
105377456	1.2e-11	5.66e-13	LINC02276
3783	1.22e-11	5.73e-13	KCNN4
165215	1.22e-11	5.77e-13	FAM171B
53335	1.23e-11	5.79e-13	BCL11A
2209	1.23e-11	5.81e-13	FCGR1A
28755	1.24e-11	5.86e-13	TRAC
2177	1.24e-11	5.87e-13	FANCD2
100	1.24e-11	5.89e-13	ADA
4681	1.25e-11	5.9e-13	NBL1
26610	1.25e-11	5.91e-13	ELP4
10758	1.25e-11	5.93e-13	TRAF3IP2
353376	1.25e-11	5.93e-13	TICAM2
9859	1.25e-11	5.95e-13	CEP170
8869	1.26e-11	5.98e-13	ST3GAL5
64395	1.26e-11	6.01e-13	GMCL1
105378954	1.27e-11	6.03e-13	LOC105378954
9839	1.28e-11	6.1e-13	ZEB2
1089	1.28e-11	6.11e-13	CEACAM4
7525	1.28e-11	6.12e-13	YES1
9214	1.34e-11	6.41e-13	FCMR
55577	1.35e-11	6.44e-13	NAGK
10403	1.37e-11	6.55e-13	NDC80
151176	1.37e-11	6.56e-13	ERFE
10990	1.37e-11	6.57e-13	LILRB5
105374981	1.37e-11	6.58e-13	LOC105374981
9638	1.37e-11	6.58e-13	FEZ1
2869	1.38e-11	6.64e-13	GRK5
80311	1.38e-11	6.64e-13	KLHL15
3480	1.41e-11	6.77e-13	IGF1R
170954	1.41e-11	6.8e-13	PPP1R18
129049	1.42e-11	6.83e-13	SGSM1
4253	1.42e-11	6.85e-13	MIA2
105378230	1.44e-11	6.97e-13	LOC105378230
10984	1.44e-11	6.97e-13	KCNQ1OT1
1235	1.46e-11	7.05e-13	CCR6
5519	1.48e-11	7.16e-13	PPP2R1B
105371933	1.49e-11	7.19e-13	LOC105371933
160760	1.49e-11	7.2e-13	PPTC7
115908	1.49e-11	7.21e-13	CTHRC1
23366	1.49e-11	7.25e-13	MATCAP2
342125	1.49e-11	7.25e-13	TMC3
2803	1.5e-11	7.26e-13	GOLGA4
2077	1.51e-11	7.33e-13	ERF
100129347	1.52e-11	7.38e-13	LINC00484
6447	1.53e-11	7.43e-13	SCG5
3899	1.53e-11	7.45e-13	AFF3
7171	1.53e-11	7.48e-13	TPM4
101059954	1.54e-11	7.51e-13	LOC101059954
7482	1.54e-11	7.51e-13	WNT2B
23161	1.54e-11	7.55e-13	SNX13
11153	1.57e-11	7.66e-13	FICD
4692	1.57e-11	7.68e-13	NDN
8875	1.57e-11	7.69e-13	VNN2
100131897	1.58e-11	7.74e-13	INSYN2B
2651	1.58e-11	7.76e-13	GCNT2
158401	1.58e-11	7.77e-13	SHOC1
30817	1.58e-11	7.77e-13	ADGRE2
23136	1.58e-11	7.78e-13	EPB41L3
54997	1.59e-11	7.82e-13	TESC
3106	1.62e-11	7.95e-13	HLA-B
55207	1.62e-11	7.97e-13	ARL8B
84034	1.63e-11	8.03e-13	EMILIN2
654816	1.64e-11	8.06e-13	NCF1B
107986348	1.64e-11	8.08e-13	LOC107986348
388512	1.64e-11	8.12e-13	CLEC17A
7113	1.66e-11	8.22e-13	TMPRSS2
105373547	1.71e-11	8.45e-13	LOC105373547
81792	1.71e-11	8.45e-13	ADAMTS12
64499	1.71e-11	8.47e-13	TPSB2
7047	1.75e-11	8.68e-13	TGM4
84197	1.8e-11	8.91e-13	POMK
56917	1.8e-11	8.92e-13	MEIS3
79183	1.8e-11	8.92e-13	TTPAL
5005	1.81e-11	8.98e-13	ORM2
100288432	1.81e-11	8.98e-13	IL10RB-DT
59343	1.81e-11	8.99e-13	SENP2
164118	1.81e-11	9e-13	TTC24
54834	1.81e-11	9.04e-13	GDAP2
9722	1.83e-11	9.13e-13	NOS1AP
2526	1.84e-11	9.18e-13	FUT4
107986785	1.84e-11	9.2e-13	LOC107986785
51364	1.88e-11	9.39e-13	ZMYND10
3208	1.9e-11	9.51e-13	HPCA
1441	1.91e-11	9.54e-13	CSF3R
7095	1.91e-11	9.57e-13	SEC62
976	1.92e-11	9.6e-13	ADGRE5
28690	1.93e-11	9.66e-13	TRAV3
5979	1.93e-11	9.69e-13	RET
8546	1.93e-11	9.72e-13	AP3B1
84959	1.95e-11	9.78e-13	UBASH3B
5026	2e-11	1.01e-12	P2RX5
102723548	2.03e-11	1.02e-12	PAQR5-DT
10439	2.03e-11	1.03e-12	OLFM1
113230	2.04e-11	1.03e-12	MISP3
51199	2.05e-11	1.04e-12	NIN
51177	2.06e-11	1.04e-12	PLEKHO1
55509	2.06e-11	1.04e-12	BATF3
64077	2.07e-11	1.05e-12	LHPP
55689	2.11e-11	1.07e-12	YEATS2
2334	2.12e-11	1.07e-12	AFF2
6357	2.13e-11	1.08e-12	CCL13
107985145	2.14e-11	1.09e-12	LOC107985145
257415	2.15e-11	1.09e-12	FAM133B
401258	2.15e-11	1.09e-12	RAB44
2870	2.15e-11	1.1e-12	GRK6
11123	2.21e-11	1.12e-12	RCAN3
677	2.24e-11	1.14e-12	ZFP36L1
125488	2.26e-11	1.15e-12	TTC39C
170482	2.28e-11	1.16e-12	CLEC4C
23316	2.29e-11	1.17e-12	CUX2
105369812	2.33e-11	1.19e-12	LOC105369812
150197	2.34e-11	1.2e-12	LINC00896
22924	2.35e-11	1.2e-12	MAPRE3
9450	2.37e-11	1.22e-12	LY86
9277	2.37e-11	1.22e-12	WDR46
3371	2.37e-11	1.22e-12	TNC
827	2.39e-11	1.23e-12	CAPN6
100008589	2.39e-11	1.23e-12	RNA28SN5
4514	2.43e-11	1.25e-12	COX3
339192	2.46e-11	1.27e-12	FMNL1-DT
115123	2.5e-11	1.29e-12	MARCHF3
3694	2.52e-11	1.3e-12	ITGB6
101927217	2.53e-11	1.31e-12	LINC01473
57210	2.53e-11	1.31e-12	SLC45A4
84803	2.54e-11	1.31e-12	GPAT3
4125	2.54e-11	1.32e-12	MAN2B1
2321	2.54e-11	1.32e-12	FLT1
105379772	2.56e-11	1.32e-12	LOC105379772
6603	2.72e-11	1.41e-12	SMARCD2
81609	2.73e-11	1.42e-12	SNX27
306	2.74e-11	1.42e-12	ANXA3
51449	2.75e-11	1.43e-12	PCYOX1
107986673	2.75e-11	1.43e-12	LOC107986673
9170	2.75e-11	1.43e-12	LPAR2
165	2.77e-11	1.44e-12	AEBP1
2535	2.77e-11	1.45e-12	FZD2
8778	2.77e-11	1.44e-12	SIGLEC5
10581	2.79e-11	1.46e-12	IFITM2
101928004	2.8e-11	1.46e-12	LOC101928004
107984213	2.81e-11	1.47e-12	LOC107984213
2589	2.81e-11	1.47e-12	GALNT1
9847	2.83e-11	1.48e-12	C2CD5
92745	2.84e-11	1.49e-12	SLC38A5
28629	2.89e-11	1.52e-12	TRBJ2-1
9236	2.89e-11	1.52e-12	CCPG1
26157	2.95e-11	1.55e-12	GIMAP2
4013	2.97e-11	1.56e-12	VWA5A
165530	2.97e-11	1.56e-12	CLEC4F
171568	2.99e-11	1.57e-12	POLR3H
728855	3e-11	1.58e-12	LINC00623
6547	3e-11	1.58e-12	SLC8A3
116039	3.01e-11	1.59e-12	OSR2
8519	3.01e-11	1.59e-12	IFITM1
105369457	3.03e-11	1.6e-12	LOC105369457
105379011	3.05e-11	1.61e-12	LOC105379011
340547	3.07e-11	1.62e-12	VSIG1
10184	3.09e-11	1.64e-12	LHFPL2
107985783	3.12e-11	1.65e-12	LOC107985783
283358	3.14e-11	1.66e-12	B4GALNT3
440738	3.15e-11	1.67e-12	MAP1LC3C
6586	3.19e-11	1.69e-12	SLIT3
57096	3.19e-11	1.69e-12	RPGRIP1
100189387	3.19e-11	1.69e-12	TRI-AAT5-5
9806	3.2e-11	1.7e-12	SPOCK2
84144	3.22e-11	1.72e-12	SYDE2
5870	3.23e-11	1.72e-12	RAB6A
8994	3.4e-11	1.81e-12	LIMD1
56833	3.4e-11	1.82e-12	SLAMF8
1739	3.43e-11	1.83e-12	DLG1
7763	3.46e-11	1.85e-12	ZFAND5
101927454	3.5e-11	1.87e-12	LOC101927454
9627	3.5e-11	1.87e-12	SNCAIP
105376352	3.5e-11	1.88e-12	LOC105376352
9754	3.5e-11	1.88e-12	STARD8
376940	3.52e-11	1.89e-12	ZC3H6
200316	3.52e-11	1.89e-12	APOBEC3F
63933	3.56e-11	1.91e-12	MCUR1
220213	3.56e-11	1.91e-12	OTUD1
54537	3.57e-11	1.92e-12	SHLD2
65010	3.59e-11	1.93e-12	SLC26A6
80215	3.6e-11	1.94e-12	RUNX1-IT1
83547	3.68e-11	1.98e-12	RILP
51237	3.69e-11	1.99e-12	MZB1
6655	3.71e-11	2e-12	SOS2
26301	3.77e-11	2.04e-12	GBGT1
192670	3.8e-11	2.05e-12	AGO4
105369319	3.8e-11	2.05e-12	LINC02705
388662	3.84e-11	2.08e-12	SLC6A17
84514	3.85e-11	2.08e-12	GHDC
84872	3.86e-11	2.09e-12	ZC3H10
1188	3.87e-11	2.1e-12	CLCNKB
5144	3.88e-11	2.11e-12	PDE4D
220988	3.92e-11	2.13e-12	HNRNPA3
107986148	3.97e-11	2.16e-12	LOC107986148
10397	3.97e-11	2.16e-12	NDRG1
863	4.01e-11	2.18e-12	CBFA2T3
652276	4.07e-11	2.22e-12	LOC652276
4176	4.11e-11	2.24e-12	MCM7
2055	4.13e-11	2.25e-12	CLN8
643977	4.17e-11	2.27e-12	FLJ32255
8491	4.18e-11	2.28e-12	MAP4K3
8530	4.21e-11	2.3e-12	CST7
57476	4.27e-11	2.34e-12	GRAMD1B
1474	4.31e-11	2.36e-12	CST6
2219	4.33e-11	2.38e-12	FCN1
105377576	4.36e-11	2.39e-12	LOC105377576
120863	4.36e-11	2.39e-12	DEPDC4
55599	4.4e-11	2.41e-12	RNPC3
440672	4.44e-11	2.44e-12	NUDT4B
100329109	4.47e-11	2.46e-12	GCSHP3
3082	4.5e-11	2.48e-12	HGF
55803	4.53e-11	2.49e-12	ADAP2
124599	4.57e-11	2.52e-12	CD300LB
161253	4.59e-11	2.53e-12	REM2
259173	4.6e-11	2.54e-12	ALS2CL
100189286	4.64e-11	2.56e-12	TRP-TGG1-1
102723692	4.68e-11	2.59e-12	LOC102723692
105378443	4.7e-11	2.6e-12	LOC105378443
9212	4.77e-11	2.64e-12	AURKB
105371251	4.85e-11	2.68e-12	LOC105371251
7068	4.86e-11	2.69e-12	THRB
81602	4.89e-11	2.71e-12	CDADC1
51	4.89e-11	2.71e-12	ACOX1
100288637	4.91e-11	2.72e-12	LOC100288637
105374836	4.93e-11	2.74e-12	LOC105374836
29028	4.93e-11	2.74e-12	ATAD2
23032	4.96e-11	2.76e-12	USP33
26112	5.06e-11	2.82e-12	CCDC69
105375242	5.06e-11	2.82e-12	LOC105375242
389362	5.07e-11	2.83e-12	PSMG4
10721	5.14e-11	2.87e-12	POLQ
79413	5.18e-11	2.89e-12	ZBED2
109864272	5.27e-11	2.95e-12	RNA28SN4
8660	5.28e-11	2.95e-12	IRS2
55388	5.3e-11	2.97e-12	MCM10
348378	5.35e-11	3e-12	SHISAL2A
11126	5.36e-11	3e-12	CD160
4001	5.38e-11	3.02e-12	LMNB1
107984011	5.48e-11	3.07e-12	LOC107984011
55102	5.49e-11	3.08e-12	ATG2B
54102	5.62e-11	3.16e-12	CLIC6
10655	5.69e-11	3.2e-12	DMRT2
4719	5.69e-11	3.2e-12	NDUFS1
5563	5.7e-11	3.21e-12	PRKAA2
23710	5.7e-11	3.21e-12	GABARAPL1
102724474	5.72e-11	3.23e-12	LOC102724474
100192386	5.72e-11	3.23e-12	FLJ16779
27184	5.78e-11	3.26e-12	DISC2
5525	5.8e-11	3.28e-12	PPP2R5A
112885	5.87e-11	3.32e-12	PHF21B
105373856	5.88e-11	3.33e-12	LOC105373856
126432	5.98e-11	3.39e-12	RINL
394	6e-11	3.4e-12	ARHGAP5
79709	6e-11	3.4e-12	COLGALT1
7596	6.04e-11	3.43e-12	ZNF45
337876	6.09e-11	3.46e-12	CHSY3
84725	6.1e-11	3.47e-12	PLEKHA8
105373455	6.11e-11	3.48e-12	LOC105373455
339883	6.2e-11	3.53e-12	APRG1
5590	6.21e-11	3.54e-12	PRKCZ
1730	6.26e-11	3.57e-12	DIAPH2
27074	6.37e-11	3.63e-12	LAMP3
28589	6.41e-11	3.67e-12	TRBV7-9
8877	6.41e-11	3.66e-12	SPHK1
26057	6.53e-11	3.74e-12	ANKRD17
57118	6.53e-11	3.74e-12	CAMK1D
6846	6.61e-11	3.78e-12	XCL2
100499194	6.65e-11	3.81e-12	LINC02992
101928512	6.76e-11	3.88e-12	LOC101928512
50615	6.78e-11	3.89e-12	IL21R
28557	6.8e-11	3.9e-12	TRBV30
105379003	6.81e-11	3.91e-12	LOC105379003
57630	6.97e-11	4e-12	SH3RF1
7326	6.99e-11	4.02e-12	UBE2G1
634	6.99e-11	4.02e-12	CEACAM1
84958	7e-11	4.03e-12	SYTL1
9555	7e-11	4.03e-12	MACROH2A1
338692	7.02e-11	4.04e-12	ANKRD13D
643733	7.17e-11	4.13e-12	CASP4LP
114134	7.2e-11	4.15e-12	SLC2A13
85376	7.32e-11	4.23e-12	RIMBP3
9957	7.33e-11	4.23e-12	HS3ST1
118788	7.36e-11	4.26e-12	PIK3AP1
55334	7.36e-11	4.25e-12	SLC39A9
112268213	7.38e-11	4.27e-12	LOC112268213
81794	7.48e-11	4.33e-12	ADAMTS10
317	7.53e-11	4.37e-12	APAF1
107986428	7.59e-11	4.4e-12	LOC107986428
79573	7.63e-11	4.43e-12	TTC13
3614	7.65e-11	4.44e-12	IMPDH1
105377806	7.65e-11	4.45e-12	LOC105377806
9874	7.7e-11	4.48e-12	TLK1
10212	7.72e-11	4.49e-12	DDX39A
640	7.75e-11	4.51e-12	BLK
7097	7.76e-11	4.52e-12	TLR2
84923	7.81e-11	4.55e-12	FAM104A
170688	7.94e-11	4.63e-12	NUDT4P2
5947	8.24e-11	4.81e-12	RBP1
4508	8.28e-11	4.84e-12	ATP6
100507516	8.34e-11	4.87e-12	LINC02984
221078	8.37e-11	4.89e-12	NSUN6
10458	8.37e-11	4.9e-12	BAIAP2
2995	8.5e-11	4.97e-12	GYPC
10371	8.54e-11	5e-12	SEMA3A
7617	8.57e-11	5.02e-12	ZNF66
100189017	8.6e-11	5.05e-12	TRE-CTC1-5
51729	8.6e-11	5.05e-12	WBP11
105379173	8.65e-11	5.08e-12	LOC105379173
105371019	8.66e-11	5.09e-12	LOC105371019
105751187	8.66e-11	5.09e-12	LRP1-AS
145173	8.67e-11	5.1e-12	B3GLCT
100526836	8.67e-11	5.11e-12	BLOC1S5-TXNDC5
105369326	8.68e-11	5.12e-12	LOC105369326
23576	8.79e-11	5.18e-12	DDAH1
3431	8.79e-11	5.19e-12	SP110
5996	8.93e-11	5.27e-12	RGS1
28680	8.97e-11	5.3e-12	TRAV8-6
7621	8.98e-11	5.3e-12	ZNF70
9849	8.99e-11	5.31e-12	ZNF518A
105377111	9.03e-11	5.34e-12	LOC105377111
9956	9.16e-11	5.42e-12	HS3ST2
112267973	9.18e-11	5.44e-12	LOC112267973
3782	9.28e-11	5.5e-12	KCNN3
1829	9.31e-11	5.52e-12	DSG2
89857	9.38e-11	5.57e-12	KLHL6
860	9.39e-11	5.57e-12	RUNX2
8510	9.51e-11	5.65e-12	MMP23B
11010	9.62e-11	5.72e-12	GLIPR1
220729	9.65e-11	5.74e-12	SDHAP4
4610	9.79e-11	5.83e-12	MYCL
6362	9.79e-11	5.83e-12	CCL18
105371254	1e-10	5.96e-12	LOC105371254
105377068	1e-10	5.98e-12	LINC02009
10269	1.04e-10	6.2e-12	ZMPSTE24
100188986	1.05e-10	6.28e-12	TRH-GTG1-7
219539	1.05e-10	6.31e-12	YPEL4
2919	1.06e-10	6.32e-12	CXCL1
10844	1.06e-10	6.36e-12	TUBGCP2
120939	1.06e-10	6.37e-12	TMEM52B
85028	1.06e-10	6.38e-12	SNHG12
105373116	1.07e-10	6.4e-12	LOC105373116
57669	1.08e-10	6.47e-12	EPB41L5
102724760	1.09e-10	6.52e-12	LOC102724760
2208	1.1e-10	6.62e-12	FCER2
105375078	1.11e-10	6.67e-12	LOC105375078
23086	1.11e-10	6.67e-12	EXPH5
112267953	1.13e-10	6.8e-12	LOC112267953
283464	1.14e-10	6.85e-12	GXYLT1
109910382	1.14e-10	6.85e-12	RNA28SN3
100505498	1.14e-10	6.86e-12	LOC100505498
283143	1.14e-10	6.89e-12	LINC00900
105373942	1.14e-10	6.91e-12	LOC105373942
51606	1.16e-10	6.99e-12	ATP6V1H
55260	1.17e-10	7.08e-12	TMEM143
675	1.17e-10	7.1e-12	BRCA2
11322	1.17e-10	7.11e-12	TMC6
112267984	1.18e-10	7.15e-12	LOC112267984
50	1.18e-10	7.15e-12	ACO2
105371129	1.18e-10	7.17e-12	LOC105371129
107985688	1.19e-10	7.25e-12	LOC107985688
105375740	1.21e-10	7.35e-12	LOC105375740
10537	1.23e-10	7.45e-12	UBD
54510	1.23e-10	7.47e-12	PCDH18
4313	1.26e-10	7.65e-12	MMP2
1731	1.27e-10	7.75e-12	SEPTIN1
5573	1.28e-10	7.78e-12	PRKAR1A
7102	1.28e-10	7.82e-12	TSPAN7
728730	1.28e-10	7.83e-12	MAP4K3-DT
783	1.29e-10	7.88e-12	CACNB2
63967	1.29e-10	7.89e-12	CLSPN
57187	1.3e-10	7.96e-12	THOC2
102216342	1.31e-10	7.99e-12	LINC01108
2849	1.31e-10	8.04e-12	GPR26
7168	1.31e-10	8.04e-12	TPM1
107986553	1.32e-10	8.06e-12	LOC107986553
55506	1.32e-10	8.09e-12	MACROH2A2
9687	1.32e-10	8.11e-12	GREB1
408	1.33e-10	8.16e-12	ARRB1
146547	1.34e-10	8.21e-12	PRSS36
105379012	1.34e-10	8.26e-12	LOC105379012
8511	1.36e-10	8.36e-12	MMP23A
8796	1.37e-10	8.41e-12	SCEL
112268170	1.38e-10	8.47e-12	LOC112268170
112268284	1.38e-10	8.47e-12	LOC112268284
2100	1.38e-10	8.5e-12	ESR2
9788	1.39e-10	8.55e-12	MTSS1
1056	1.39e-10	8.57e-12	CEL
6554	1.39e-10	8.59e-12	SLC10A1
11101	1.39e-10	8.62e-12	ATE1
57611	1.39e-10	8.61e-12	ISLR2
201477	1.4e-10	8.67e-12	DLGAP1-AS3
221914	1.4e-10	8.68e-12	GPC2
8543	1.43e-10	8.83e-12	LMO4
51715	1.43e-10	8.83e-12	RAB23
389289	1.45e-10	9.02e-12	ANXA2R
353219	1.47e-10	9.13e-12	KAAG1
440804	1.48e-10	9.2e-12	RIMBP3B
388325	1.49e-10	9.23e-12	SCIMP
65243	1.49e-10	9.24e-12	ZFP69B
4145	1.49e-10	9.25e-12	MATK
84440	1.52e-10	9.46e-12	RAB11FIP4
57722	1.53e-10	9.52e-12	IGDCC4
23078	1.53e-10	9.55e-12	VWA8
5825	1.55e-10	9.64e-12	ABCD3
10505	1.56e-10	9.71e-12	SEMA4F
653604	1.56e-10	9.73e-12	H3C13
22974	1.57e-10	9.8e-12	TPX2
101927608	1.57e-10	9.82e-12	LOC101927608
647121	1.57e-10	9.83e-12	EMBP1
4776	1.57e-10	9.84e-12	NFATC4
8828	1.61e-10	1e-11	NRP2
80205	1.63e-10	1.02e-11	CHD9
103021295	1.64e-10	1.03e-11	LOC103021295
84953	1.64e-10	1.03e-11	MICALCL
57053	1.65e-10	1.04e-11	CHRNA10
105373170	1.67e-10	1.05e-11	LOC105373170
4625	1.67e-10	1.05e-11	MYH7
10235	1.68e-10	1.05e-11	RASGRP2
400958	1.69e-10	1.06e-11	LINC02245
25946	1.7e-10	1.07e-11	ZNF385A
12	1.7e-10	1.07e-11	SERPINA3
203068	1.71e-10	1.08e-11	TUBB
4647	1.71e-10	1.08e-11	MYO7A
23645	1.71e-10	1.08e-11	PPP1R15A
7644	1.72e-10	1.08e-11	ZNF91
105370846	1.72e-10	1.09e-11	LOC105370846
94104	1.73e-10	1.09e-11	PAXBP1
105376093	1.73e-10	1.1e-11	LOC105376093
3716	1.75e-10	1.1e-11	JAK1
929	1.75e-10	1.11e-11	CD14
9265	1.75e-10	1.11e-11	CYTH3
105369813	1.75e-10	1.11e-11	LOC105369813
11190	1.76e-10	1.11e-11	CEP250
81567	1.76e-10	1.12e-11	TXNDC5
2900	1.77e-10	1.12e-11	GRIK4
910	1.79e-10	1.14e-11	CD1B
26039	1.8e-10	1.14e-11	SS18L1
7130	1.82e-10	1.16e-11	TNFAIP6
80210	1.83e-10	1.16e-11	ARMC9
440900	1.83e-10	1.16e-11	LINC01191
889	1.83e-10	1.16e-11	KRIT1
55205	1.83e-10	1.16e-11	ZNF532
115727	1.83e-10	1.17e-11	RASGRP4
27286	1.83e-10	1.17e-11	SRPX2
23729	1.83e-10	1.17e-11	SHPK
1311	1.84e-10	1.17e-11	COMP
105372903	1.85e-10	1.18e-11	LOC105372903
9399	1.86e-10	1.19e-11	STOML1
107984932	1.86e-10	1.19e-11	LOC107984932
23362	1.87e-10	1.19e-11	PSD3
51091	1.94e-10	1.24e-11	SEPSECS
5699	1.95e-10	1.25e-11	PSMB10
6281	1.95e-10	1.25e-11	S100A10
11228	1.95e-10	1.25e-11	RASSF8
105369171	1.96e-10	1.26e-11	LOC105369171
26118	1.96e-10	1.26e-11	WSB1
9662	1.96e-10	1.26e-11	CEP135
4536	1.97e-10	1.27e-11	ND2
57502	1.97e-10	1.27e-11	NLGN4X
9885	1.99e-10	1.28e-11	OSBPL2
7161	2.02e-10	1.3e-11	TP73
10942	2.02e-10	1.3e-11	PRSS21
10536	2.02e-10	1.31e-11	P3H3
283385	2.05e-10	1.32e-11	MORN3
9147	2.05e-10	1.32e-11	NEMF
5338	2.07e-10	1.34e-11	PLD2
107985517	2.09e-10	1.35e-11	LOC107985517
107987234	2.09e-10	1.35e-11	LOC107987234
5764	2.09e-10	1.35e-11	PTN
6253	2.11e-10	1.36e-11	RTN2
51809	2.14e-10	1.38e-11	GALNT7
102724143	2.15e-10	1.39e-11	LOC102724143
7088	2.15e-10	1.39e-11	TLE1
8329	2.15e-10	1.39e-11	H2AC13
255488	2.16e-10	1.4e-11	RNF144B
1491	2.18e-10	1.42e-11	CTH
79026	2.19e-10	1.42e-11	AHNAK
84689	2.19e-10	1.43e-11	MS4A14
784	2.2e-10	1.43e-11	CACNB3
157769	2.21e-10	1.44e-11	FAM91A1
112268421	2.21e-10	1.44e-11	LOC112268421
8751	2.26e-10	1.47e-11	ADAM15
8936	2.28e-10	1.49e-11	WASF1
1847	2.3e-10	1.5e-11	DUSP5
79190	2.32e-10	1.51e-11	IRX6
10015	2.34e-10	1.53e-11	PDCD6IP
54504	2.36e-10	1.54e-11	CPVL
105372663	2.36e-10	1.54e-11	LOC105372663
7871	2.36e-10	1.55e-11	SLMAP
80232	2.37e-10	1.55e-11	WDR26
5004	2.37e-10	1.55e-11	ORM1
105372296	2.37e-10	1.55e-11	LOC105372296
107985980	2.37e-10	1.55e-11	LOC107985980
105375400	2.39e-10	1.57e-11	LOC105375400
2568	2.41e-10	1.58e-11	GABRP
81831	2.43e-10	1.59e-11	NETO2
440435	2.43e-10	1.6e-11	GPR179
10148	2.45e-10	1.61e-11	EBI3
767846	2.46e-10	1.62e-11	PFN1P2
91137	2.48e-10	1.63e-11	SLC25A46
54443	2.49e-10	1.64e-11	ANLN
4646	2.5e-10	1.65e-11	MYO6
28569	2.51e-10	1.65e-11	TRBV18
107985627	2.52e-10	1.66e-11	LOC107985627
56882	2.53e-10	1.67e-11	CDC42SE1
10410	2.54e-10	1.68e-11	IFITM3
2018	2.56e-10	1.69e-11	EMX2
6367	2.57e-10	1.7e-11	CCL22
55631	2.58e-10	1.71e-11	LRRC40
28623	2.6e-10	1.72e-11	TRBJ2-6
80332	2.6e-10	1.72e-11	ADAM33
10979	2.61e-10	1.73e-11	FERMT2
387923	2.62e-10	1.73e-11	SERP2
23547	2.62e-10	1.74e-11	LILRA4
116154	2.62e-10	1.74e-11	PHACTR3
3833	2.65e-10	1.76e-11	KIFC1
25895	2.68e-10	1.78e-11	EEF1AKMT3
28450	2.69e-10	1.79e-11	IGHV3-11
221294	2.7e-10	1.8e-11	NT5DC1
100532736	2.71e-10	1.8e-11	MICOS10-NBL1
645784	2.71e-10	1.8e-11	ANKRD36BP2
284759	2.72e-10	1.81e-11	SIRPB2
91662	2.73e-10	1.82e-11	NLRP12
28804	2.74e-10	1.82e-11	IGLV3-9
10884	2.75e-10	1.83e-11	MRPS30
3497	2.77e-10	1.85e-11	IGHE
54902	2.78e-10	1.86e-11	TTC19
5291	2.82e-10	1.88e-11	PIK3CB
1821	2.82e-10	1.89e-11	DRP2
100505967	2.83e-10	1.89e-11	LINC00645
9437	2.84e-10	1.9e-11	NCR1
80758	2.85e-10	1.91e-11	PRR7
153328	2.88e-10	1.93e-11	SLC25A48
8439	2.88e-10	1.93e-11	NSMAF
10565	2.88e-10	1.93e-11	ARFGEF1
6483	2.9e-10	1.95e-11	ST3GAL2
107986115	2.91e-10	1.96e-11	LOC107986115
29914	2.93e-10	1.97e-11	UBIAD1
55605	2.97e-10	2e-11	KIF21A
10866	2.99e-10	2.01e-11	HCP5
200844	2.99e-10	2.01e-11	CFAP20DC
8784	2.99e-10	2.01e-11	TNFRSF18
4983	3.02e-10	2.03e-11	OPHN1
55143	3.05e-10	2.06e-11	CDCA8
388077	3.06e-10	2.06e-11	IGHV1OR15-1
387700	3.06e-10	2.07e-11	SLC16A12
5286	3.07e-10	2.07e-11	PIK3C2A
28559	3.11e-10	2.1e-11	TRBV28
92255	3.15e-10	2.13e-11	LMBRD2
11031	3.15e-10	2.13e-11	RAB31
106632264	3.15e-10	2.13e-11	RNA28SN1
79944	3.16e-10	2.14e-11	L2HGDH
25932	3.17e-10	2.15e-11	CLIC4
5520	3.2e-10	2.17e-11	PPP2R2A
54101	3.22e-10	2.18e-11	RIPK4
51277	3.26e-10	2.21e-11	DNAJC27
28568	3.29e-10	2.24e-11	TRBV19
112267855	3.33e-10	2.26e-11	LOC112267855
5873	3.35e-10	2.27e-11	RAB27A
112268267	3.39e-10	2.3e-11	LOC112268267
8853	3.39e-10	2.3e-11	ASAP2
118429	3.45e-10	2.35e-11	ANTXR2
7033	3.46e-10	2.36e-11	TFF3
29766	3.49e-10	2.38e-11	TMOD3
101929531	3.49e-10	2.38e-11	LINC01871
5954	3.51e-10	2.39e-11	RCN1
2335	3.53e-10	2.41e-11	FN1
51703	3.54e-10	2.41e-11	ACSL5
113802	3.55e-10	2.43e-11	HENMT1
80818	3.63e-10	2.48e-11	ZNF436
2004	3.66e-10	2.51e-11	ELK3
91319	3.66e-10	2.51e-11	DERL3
105369151	3.67e-10	2.51e-11	LOC105369151
6775	3.67e-10	2.51e-11	STAT4
116987	3.69e-10	2.53e-11	AGAP1
105374080	3.69e-10	2.53e-11	LOC105374080
5334	3.73e-10	2.56e-11	PLCL1
9976	3.73e-10	2.56e-11	CLEC2B
5175	3.74e-10	2.57e-11	PECAM1
55083	3.75e-10	2.57e-11	KIF26B
283537	3.79e-10	2.61e-11	SLC46A3
55659	3.82e-10	2.62e-11	ZNF416
10544	3.82e-10	2.63e-11	PROCR
3459	3.86e-10	2.66e-11	IFNGR1
105377110	3.88e-10	2.67e-11	CFAP20DC-DT
85465	3.89e-10	2.68e-11	SELENOI
11009	3.92e-10	2.71e-11	IL24
148741	3.94e-10	2.72e-11	ANKRD35
101752400	3.94e-10	2.72e-11	CAPN10-DT
26136	3.94e-10	2.72e-11	TES
5050	3.97e-10	2.74e-11	PAFAH1B3
7233	3.97e-10	2.74e-11	TRR-CCG2-1
9834	4e-10	2.76e-11	FAM30A
5412	4.02e-10	2.78e-11	UBL3
84888	4.07e-10	2.82e-11	SPPL2A
81627	4.09e-10	2.83e-11	TRMT1L
342892	4.1e-10	2.84e-11	ZNF850
59341	4.15e-10	2.88e-11	TRPV4
2281	4.15e-10	2.88e-11	FKBP1B
101927935	4.15e-10	2.88e-11	LOC101927935
3934	4.15e-10	2.88e-11	LCN2
643036	4.16e-10	2.89e-11	SLED1
23417	4.21e-10	2.93e-11	MLYCD
55660	4.24e-10	2.95e-11	PRPF40A
90632	4.29e-10	2.99e-11	LINC00473
431705	4.3e-10	2.99e-11	ASTL
3248	4.3e-10	3e-11	HPGD
137872	4.31e-10	3e-11	ADHFE1
54586	4.35e-10	3.03e-11	EQTN
126129	4.36e-10	3.04e-11	CPT1C
2120	4.36e-10	3.04e-11	ETV6
57121	4.44e-10	3.1e-11	LPAR5
105377006	4.44e-10	3.11e-11	LINC02084
80759	4.45e-10	3.11e-11	KHDC1
60312	4.46e-10	3.12e-11	AFAP1
4277	4.46e-10	3.12e-11	MICB
125965	4.46e-10	3.12e-11	COX6B2
5450	4.53e-10	3.18e-11	POU2AF1
2214	4.54e-10	3.19e-11	FCGR3A
10717	4.55e-10	3.19e-11	AP4B1
105378620	4.6e-10	3.23e-11	LOC105378620
10314	4.61e-10	3.24e-11	LANCL1
401105	4.64e-10	3.26e-11	FLJ42393
55247	4.64e-10	3.26e-11	NEIL3
105370563	4.65e-10	3.27e-11	LOC105370563
9545	4.65e-10	3.27e-11	RAB3D
3643	4.65e-10	3.28e-11	INSR
199974	4.72e-10	3.32e-11	CYP4Z1
107984328	4.75e-10	3.35e-11	LOC107984328
56652	4.77e-10	3.37e-11	TWNK
22900	4.78e-10	3.38e-11	CARD8
1184	4.82e-10	3.4e-11	CLCN5
107986016	4.84e-10	3.42e-11	LOC107986016
58528	4.89e-10	3.46e-11	RRAGD
2920	4.92e-10	3.48e-11	CXCL2
107984547	4.94e-10	3.5e-11	LOC107984547
1616	5.01e-10	3.55e-11	DAXX
4987	5.02e-10	3.56e-11	OPRL1
79632	5.03e-10	3.57e-11	FAM184A
8342	5.08e-10	3.61e-11	H2BC14
9833	5.08e-10	3.61e-11	MELK
5581	5.16e-10	3.67e-11	PRKCE
58476	5.17e-10	3.68e-11	TP53INP2
22908	5.17e-10	3.68e-11	SACM1L
8763	5.19e-10	3.7e-11	CD164
23516	5.19e-10	3.7e-11	SLC39A14
200298	5.2e-10	3.71e-11	LINC00528
25809	5.22e-10	3.72e-11	TTLL1
2268	5.29e-10	3.78e-11	FGR
729291	5.31e-10	3.79e-11	LOC729291
54874	5.31e-10	3.79e-11	FNBP1L
84832	5.38e-10	3.85e-11	ANKRD36BP1
388942	5.43e-10	3.88e-11	LINC01913
84460	5.44e-10	3.89e-11	ZMAT1
255520	5.47e-10	3.91e-11	ELMOD2
152006	5.53e-10	3.96e-11	RNF38
2888	5.54e-10	3.97e-11	GRB14
8968	5.58e-10	4e-11	H3C7
102723350	5.62e-10	4.03e-11	LINC02636
101928114	5.72e-10	4.11e-11	LINC01811
10385	5.75e-10	4.13e-11	BTN2A2
101927624	5.78e-10	4.15e-11	LINC01150
3291	5.78e-10	4.16e-11	HSD11B2
6832	5.98e-10	4.3e-11	SUPV3L1
23512	6.02e-10	4.33e-11	SUZ12
114882	6.04e-10	4.35e-11	OSBPL8
196264	6.06e-10	4.37e-11	MPZL3
155006	6.08e-10	4.38e-11	TMEM213
100288805	6.11e-10	4.4e-11	HYDIN2
10226	6.14e-10	4.43e-11	PLIN3
101927551	6.15e-10	4.44e-11	LOC101927551
338773	6.16e-10	4.45e-11	TMEM119
80008	6.17e-10	4.46e-11	TMEM156
165545	6.22e-10	4.5e-11	DQX1
1906	6.22e-10	4.5e-11	EDN1
481	6.22e-10	4.5e-11	ATP1B1
342908	6.26e-10	4.53e-11	ZNF404
79699	6.31e-10	4.57e-11	ZYG11B
23558	6.35e-10	4.6e-11	WBP2
144100	6.38e-10	4.63e-11	PLEKHA7
23096	6.39e-10	4.64e-11	IQSEC2
100302522	6.46e-10	4.69e-11	PTCSC1
148170	6.47e-10	4.7e-11	CDC42EP5
9672	6.52e-10	4.74e-11	SDC3
100996740	6.53e-10	4.75e-11	LOC100996740
9595	6.72e-10	4.89e-11	CYTIP
105375172	6.78e-10	4.94e-11	LOC105375172
440503	6.81e-10	4.96e-11	PLIN5
107986298	6.81e-10	4.96e-11	LOC107986298
63929	6.86e-10	5e-11	XPNPEP3
23263	6.87e-10	5.01e-11	MCF2L
107080644	6.9e-10	5.03e-11	CNPY3-GNMT
6097	6.98e-10	5.09e-11	RORC
79815	7e-10	5.11e-11	NIPAL2
102725082	7.29e-10	5.33e-11	LOC102725082
8780	7.29e-10	5.33e-11	RIOK3
84733	7.31e-10	5.35e-11	CBX2
107984670	7.31e-10	5.36e-11	LOC107984670
23413	7.38e-10	5.41e-11	NCS1
51200	7.41e-10	5.43e-11	CPA4
284612	7.49e-10	5.5e-11	SYPL2
105375781	7.52e-10	5.52e-11	LOC105375781
10075	7.53e-10	5.53e-11	HUWE1
100996567	7.57e-10	5.56e-11	ANTXRLP1
105370867	7.58e-10	5.57e-11	LOC105370867
254428	7.58e-10	5.57e-11	SLC41A1
26751	7.62e-10	5.6e-11	SH3YL1
107986304	7.76e-10	5.71e-11	LOC107986304
10216	7.82e-10	5.76e-11	PRG4
51313	7.86e-10	5.79e-11	GASK1B
105371606	7.87e-10	5.8e-11	LOC105371606
100126791	7.88e-10	5.81e-11	EGOT
5718	7.89e-10	5.82e-11	PSMD12
105371512	7.93e-10	5.85e-11	LOC105371512
1545	8e-10	5.91e-11	CYP1B1
51303	8e-10	5.91e-11	FKBP11
203547	8e-10	5.91e-11	VMA21
10943	8.01e-10	5.92e-11	MSL3
112616	8.05e-10	5.96e-11	CMTM7
1316	8.12e-10	6.01e-11	KLF6
79733	8.21e-10	6.08e-11	E2F8
3908	8.23e-10	6.1e-11	LAMA2
94081	8.26e-10	6.13e-11	SFXN1
84542	8.28e-10	6.14e-11	SANBR
214	8.33e-10	6.18e-11	ALCAM
5884	8.33e-10	6.18e-11	RAD17
6489	8.37e-10	6.22e-11	ST8SIA1
151877	8.45e-10	6.28e-11	MAGI1-IT1
79882	8.51e-10	6.32e-11	ZC3H14
259217	8.51e-10	6.33e-11	HSPA12A
[truncated: 13,817 more rows]
