# Supplementary material for: Rosavin improves insulin resistance and alleviates hepatic and kidney damage via modulating the cGAS-STING pathway and autophagy signaling in HFD/STZ-induced T2DM animals
Source: Royal Society of Chemistry journal article supplement (doi:10.1039/d4md00023d), 2024-01-01
Supplement: d4md00023d2.xlsx [file d4md00023d2.xlsx]

## Sheet: KEGG_2021_Human
Term	Overlap	P-value	Adjusted P-value	Old P-value	Old Adjusted P-value	Odds Ratio	Combined Score	Genes
Propanoate metabolism	32/34	0.0168148	0.999998	0	0	4.23795	17.3141	ACSS3;ACSS2;ECHS1;ABAT;ACACB;ACACA;ACAT1;LDHC;LDHB;LDHA;DBT;MLYCD;MMUT;ACSS1;ACADS;HIBCH;BCKDHA;BCKDHB;HADHA;ALDH6A1;SUCLA2;PCCA;ACOX1;EHHADH;PCCB;ECHDC1;SUCLG2;SUCLG1;ACOX3;DLD;LDHAL6A;LDHAL6B
Fatty acid degradation	39/43	0.037512	0.999998	0	0	2.58241	8.4783	GCDH;ACADVL;ACAA2;ECHS1;ADH1C;ADH1B;ADH1A;ECI1;ECI2;ADH5;ACAT1;ADH6;ADH4;ACADL;ALDH1B1;ALDH2;CPT2;ACADM;ACAA1;HADH;ACADS;CPT1A;ACSL1;ACSL6;ACSL5;ACSL4;ACSL3;CPT1C;ACADSB;ALDH3A2;HADHB;HADHA;ACOX1;EHHADH;ACSBG1;ACOX3;ACSBG2;ALDH7A1;ALDH9A1
Alanine, aspartate and glutamate metabolism	33/37	0.0887055	0.999998	0	0	2.18428	5.29128	GLS2;ABAT;GPT;DDO;GLS;IL4I1;PPAT;ASL;RIMKLA;GLUL;RIMKLB;ADSL;GOT1;AGXT2;GAD1;GFPT2;GPT2;CAD;GOT2;ASNS;ASRGL1;ASS1;ALDH4A1;GLUD1;GLUD2;ALDH5A1;FOLH1;ADSS1;ADSS2;AGXT;NAT8L;ASPA;NIT2
B cell receptor signaling pathway	69/81	0.109066	0.999998	0	0	1.52294	3.37453	GSK3B;IFITM1;CD81;INPPL1;PIK3CD;PIK3CB;IKBKB;PPP3CA;PPP3CB;PPP3CC;AKT2;BLNK;RAC2;RAC3;RAC1;HRAS;VAV3;CR2;MAP2K2;CHUK;SYK;PRKCB;FOS;VAV1;VAV2;PIK3CA;BTK;RAF1;SOS1;SOS2;CARD11;LILRA6;DAPP1;PIK3R3;BCL10;LILRA1;LILRA2;LILRA4;LILRA5;RASGRP3;CD79B;CD79A;NRAS;PPP3R1;CD19;INPP5D;PLCG2;MAPK1;MAPK3;LYN;JUN;CD72;NFATC3;NFATC2;LILRB1;NFATC1;LILRB2;LILRB3;LILRB4;LILRB5;NFKB1;NFKBIA;KRAS;PTPN6;FCGR2B;NFKBIE;PI…
Valine, leucine and isoleucine degradation	41/48	0.18507	0.999998	0	0	1.55042	2.61559	ACAA2;ECHS1;HIBADH;ABAT;ACAT1;HMGCL;IL4I1;ALDH1B1;ALDH2;AUH;OXCT1;DBT;AOX1;OXCT2;ACADM;MMUT;ACAA1;HADH;ACADS;HIBCH;ACAD8;BCKDHA;MCCC2;HMGCS1;AGXT2;BCKDHB;MCCC1;ACADSB;ALDH3A2;HADHB;HADHA;ALDH6A1;PCCA;EHHADH;IVD;PCCB;BCAT1;ALDH7A1;DLD;ALDH9A1;BCAT2
Tryptophan metabolism	36/42	0.195317	0.999998	0	0	1.58811	2.5936	GCDH;DDC;ECHS1;MAOB;MAOA;HAAO;ASMT;DLST;ACAT1;ACMSD;DHTKD1;IL4I1;AANAT;ALDH1B1;ALDH2;TDO2;KYNU;AFMID;AOX1;CYP1B1;HADH;AOC1;KMO;INMT;ALDH3A2;HADHA;EHHADH;CAT;KYAT3;KYAT1;ALDH8A1;IDO2;ALDH7A1;DLD;ALDH9A1;IDO1
AGE-RAGE signaling pathway in diabetic complications	83/100	0.201887	0.999998	0	0	1.29273	2.06844	CDKN1B;CXCL8;SERPINE1;PIK3CD;PIK3CB;TNF;ICAM1;THBD;CCND1;AKT2;CASP3;PIM1;PLCE1;RAC1;JAK2;HRAS;EDN1;PRKCB;PRKCE;MMP2;PRKCD;CYBB;PRKCA;F3;TGFBR2;PLCB3;PLCB4;COL4A2;PIK3CA;COL4A1;COL4A4;IL1B;COL4A3;AGTR1;PLCB2;PIK3R3;AGER;PRKCZ;FOXO1;MAPK9;MAPK8;NRAS;PLCG2;CCL2;MAPK1;PLCG1;MAPK3;STAT5A;EGR1;STAT5B;JUN;SMAD4;TGFB2;SMAD3;TGFB1;VCAM1;TGFB3;STAT1;STAT3;FN1;VEGFC;NFATC1;VEGFD;MAPK14;SELE;NFKB1;MAPK12;MAP…
Citrate cycle (TCA cycle)	26/30	0.217654	0.999998	0	0	1.72019	2.62303	FH;DLST;OGDHL;IDH3B;DLAT;PCK1;IDH3A;PCK2;PDHA1;IDH3G;MDH2;IDH1;IDH2;SDHC;SDHD;SDHA;SDHB;CS;PC;SUCLA2;OGDH;SUCLG2;ACO1;SUCLG1;ACO2;DLD
Glyoxylate and dicarboxylate metabolism	26/30	0.217654	0.999998	0	0	1.72019	2.62303	ACSS2;GLDC;SHMT2;SHMT1;ACAT1;GCSH;AFMID;HYI;HAO1;MMUT;ACSS1;GLUL;HAO2;MDH2;GLYCTK;AMT;HOGA1;CS;GRHPR;PCCA;CAT;PCCB;ACO1;ACO2;AGXT;DLD
Leishmaniasis	64/77	0.236323	0.999998	0	0	1.30319	1.87993	ITGB1;ITGAM;NCF1;NCF2;ITGB2;NCF4;TNF;FCGR3A;FCGR3B;HLA-DOA;JAK2;HLA-DOB;MAP3K7;HLA-DPA1;JAK1;IL10;CR1;ITGA4;IFNGR1;PRKCB;IFNGR2;CYBB;CYBA;FOS;IRAK4;IFNG;IL1B;EEF1A2;TLR4;HLA-DQB1;TLR2;PTGS2;C3;HLA-DMA;HLA-DMB;IRAK1;MAPK1;FCGR1A;HLA-DQA2;HLA-DQA1;MAPK3;HLA-DRB5;JUN;MARCKSL1;TGFB2;TGFB1;STAT1;TGFB3;MAPK14;MAPK12;NFKB1;MAPK13;NFKBIA;MAPK11;FCGR2A;CR1L;HLA-DPB1;HLA-DRA;PTPN6;TAB2;FCGR2C;HLA-DRB1;MYD8…
Vitamin B6 metabolism	2023-06-06	0.244612	0.999998	0	0	25098	35340	PDXK;PHOSPHO2;PSAT1;PNPO;AOX1;PDXP
Malaria	42/50	0.253838	0.999998	0	0	1.38946	1.90503	CD40;CSF3;GYPA;CXCL8;GYPC;KLRB1;LRP1;CD81;ITGB2;HBB;ITGAL;THBS2;TNF;ICAM1;COMP;KLRK1;KLRC4-KLRK1;CCL2;CD36;IL10;TGFB2;CR1;TGFB1;VCAM1;TGFB3;HGF;IL18;SELE;SELP;IL6;CD40LG;IFNG;CR1L;IL1B;PECAM1;TLR9;SDC1;ACKR1;MET;TLR4;MYD88;TLR2
Viral myocarditis	50/60	0.263424	0.999998	0	0	1.32333	1.76531	CD86;CD40;CD80;ITGB2;PRF1;ITGAL;ACTB;ACTG1;ICAM1;CASP9;CASP8;SGCD;CCND1;SGCB;CASP3;DAG1;RAC2;RAC3;RAC1;HLA-DOA;HLA-DOB;SGCG;HLA-DPA1;CXADR;HLA-B;HLA-A;HLA-F;HLA-E;HLA-DQB1;MYH7;LAMA2;HLA-DMA;HLA-DMB;ABL2;DMD;FYN;BID;HLA-DQA2;CD55;HLA-DQA1;HLA-DRB5;CAV1;CD40LG;CD28;HLA-DPB1;CYCS;HLA-DRA;EIF4G3;HLA-DRB1;EIF4G1
Selenocompound metabolism	15/17	0.277804	0.999998	0	0	1.9844	2.5417	TXNRD3;TXNRD2;MARS2;TXNRD1;MARS1;MTR;INMT;PAPSS2;PAPSS1;SEPSECS;CTH;KYAT3;KYAT1;SCLY;SEPHS2
Fructose and mannose metabolism	28/33	0.283719	0.999998	0	0	1.48184	1.86678	PFKFB2;PFKFB1;PFKFB4;PFKFB3;AKR1B1;HK2;HK1;KHK;GMPPB;HK3;TKFC;GMDS;ENOSF1;FPGT;GMPPA;GFUS;TIGAR;PMM1;PMM2;SORD;PFKL;AKR1B10;FCSK;HKDC1;ALDOB;FBP1;PFKM;PFKP
Primary immunodeficiency	32/38	0.291028	0.999998	0	0	1.4113	1.74201	CD40;CIITA;DCLRE1C;TNFRSF13B;TNFRSF13C;CD3E;IL2RG;CD3D;CD79A;CD19;BLNK;ICOS;RAG2;JAK3;CD8B2;TAP2;TAP1;RFXANK;ZAP70;CD4;CD40LG;PTPRC;CD8B;CD8A;IGLL1;LCK;RFX5;RFXAP;BTK;ORAI1;IL7R;ADA
PD-L1 expression and PD-1 checkpoint pathway in cancer	73/89	0.29661	0.999998	0	0	1.20757	1.4676	ALK;PTEN;PIK3CD;CD3G;PIK3CB;CD3E;CD3D;IKBKB;PPP3CA;PPP3CB;PPP3CC;AKT2;JAK2;HRAS;JAK1;MAP2K3;BATF2;BATF3;MAP2K2;TICAM2;CHUK;CSNK2A1;IFNGR1;CSNK2A3;IFNGR2;CSNK2A2;FOS;TICAM1;TIRAP;ZAP70;IFNG;PIK3CA;LCK;TLR9;RAF1;TLR4;TLR2;CD274;PIK3R3;NRAS;PPP3R1;MAPK1;PLCG1;MAP2K6;MAPK3;MAP3K3;JUN;EGF;STAT1;STAT3;NFATC3;NFATC2;NFATC1;MAPK14;MAPK12;MTOR;NFKB1;BATF;MAPK13;NFKBIA;MAPK11;CD4;RPS6KB1;RPS6KB2;CD28;KRAS;…
T cell receptor signaling pathway	85/104	0.298958	0.999998	0	0	1.18411	1.42976	GSK3B;ITK;PIK3CD;CBLB;CD3G;PIK3CB;CD3E;TNF;CD3D;IKBKB;PPP3CA;PPP3CB;PPP3CC;AKT2;GRAP2;NCK2;CTLA4;MAP3K8;MAP3K7;HRAS;NCK1;IL10;VAV3;MAP2K2;CHUK;PDPK1;CD8B2;FOS;RHOA;VAV1;VAV2;ZAP70;CD8B;IFNG;PIK3CA;CD8A;LCK;LCP2;RAF1;SOS1;SOS2;CARD11;PIK3R3;BCL10;MAPK9;PPP3R1;MAPK8;NRAS;MAPK1;PAK6;FYN;PLCG1;ICOS;MAP2K7;PAK3;PAK2;PAK5;MAPK3;PAK4;JUN;NFATC3;NFATC2;NFATC1;MAPK14;NFKB1;MAPK12;BUB1B-PAK6;MAPK13;NFKBIA;…
D-Glutamine and D-glutamate metabolism	2023-05-05	0.309323	0.999998	0	0	20915	24541	GLUD1;GLUD2;GLS2;DGLUCY;GLS
Neomycin, kanamycin and gentamicin biosynthesis	2023-05-05	0.309323	0.999998	0	0	20915	24541	HK3;HKDC1;GCK;HK2;HK1
Rheumatoid arthritis	76/93	0.315801	0.999998	0	0	1.18318	1.36379	CD86;CXCL6;CXCL8;FLT1;CSF1;CD80;ITGB2;CXCL1;TCIRG1;CXCL3;ITGAL;CXCL2;TNF;CXCL5;ICAM1;TNFSF13B;CTSL;CTSK;CTLA4;TNFSF11;ATP6V1E1;HLA-DOA;HLA-DOB;HLA-DPA1;IL11;ATP6V1G2;ATP6AP1;IL15;MMP1;IL18;FOS;IFNG;IL23A;IL1B;ATP6V1B2;LTB;ATP6V0D1;ATP6V0C;ATP6V0D2;TLR4;ATP6V1B1;HLA-DQB1;TLR2;ATP6V1A;CCL3L3;TNFRSF11A;HLA-DMA;HLA-DMB;CCL5;ATP6V0A2;CCL3;ATP6V1H;CCL2;ATP6V0A4;ATP6V0E2;ATP6V1G3;ATP6V1D;HLA-DQA2;ATP6V1…
Thyroid cancer	31/37	0.319265	0.999998	0	0	1.36711	1.56087	RET;CDKN1A;LEF1;TCF7;NRAS;RXRA;CCND1;TFG;CDH1;MYC;TPR;MAPK1;BAK1;POLK;HRAS;RXRG;MAPK3;TCF7L2;TCF7L1;MAP2K2;GADD45B;GADD45A;TPM3;NCOA4;BRAF;DDB2;GADD45G;CCDC6;BAX;KRAS;TP53
Yersinia infection	111/137	0.330865	0.999998	0	0	1.12996	1.24979	WIPF1;WIPF2;WIPF3;ARPC5L;TNF;ACTB;ACTG1;CRKL;PYCARD;RPS6KA3;RPS6KA6;TBK1;AKT2;RPS6KA2;MAP3K7;MAP2K3;MAP2K4;MAP2K2;TICAM1;CD8B;CD8A;ELMO1;SKAP2;ARHGEF28;PXN;PIK3R3;MEFV;IRAK1;NLRP3;PIP5K1B;PLCG1;MAP2K7;MAP2K6;JUN;FYB1;FN1;NFATC3;NFATC2;ARPC4;NFATC1;ARPC5;NFKB1;NFKBIA;IL6;ARPC2;ARPC3;GNAQ;TAB2;LAT;MYD88;ITGB1;GSK3B;CXCL8;ARPC1B;PIK3CD;PIK3CB;WASL;IKBKB;CASP1;RAC2;RAC3;RAC1;ACTR3;IL10;VAV3;ACTR2;ARH…
Osteoclast differentiation	103/127	0.332074	0.999998	0	0	1.13587	1.25218	SPI1;CSF1;NCF1;NCF2;NCF4;SIRPG;TNF;AKT2;TNFSF11;JUNB;MAP3K7;IFNAR2;IL1R1;CYBA;OSCAR;TYROBP;BTK;SQSTM1;IFNAR1;CSF1R;PIK3R3;TNFRSF11B;TNFRSF11A;SOCS3;PPP3R1;CALCR;SOCS1;PLCG2;MAP2K7;MAP2K6;JUN;TGFB2;JUND;TGFB1;NFATC2;NFATC1;NFKB1;FOSL2;NFKB2;FOSL1;NFKBIA;CYLD;TAB2;ITGB3;FHL2;PIK3CD;TREM2;PIK3CB;SIRPB1;IKBKB;PPP3CA;FCGR3A;PPP3CB;FCGR3B;PPP3CC;CTSK;BLNK;RAC1;JAK1;CHUK;SYK;IFNGR1;IFNGR2;TRAF2;FOS;GAB2…
Non-small cell lung cancer	59/72	0.333824	0.999998	0	0	1.201	1.31767	ALK;RB1;RET;CDKN1A;ARAF;PIK3CD;PIK3CB;CASP9;RASSF1;CCND1;KIF5C;AKT2;KIF5B;RASSF5;KIF5A;POLK;HRAS;JAK3;MAP2K2;PDPK1;PRKCB;HGF;PRKCA;DDB2;PIK3CA;RAF1;SOS1;MET;SOS2;TP53;PIK3R3;FOXO3;STK4;FHIT;NRAS;RXRA;ERBB2;E2F1;PLCG2;E2F2;MAPK1;BAK1;PLCG1;RXRG;MAPK3;STAT5A;STAT5B;GADD45B;BAD;CDKN2A;EGF;GADD45A;STAT3;BRAF;GADD45G;CDK6;CDK4;BAX;KRAS
Th17 cell differentiation	87/107	0.333958	0.999998	0	0	1.15124	1.26261	IL23R;RORC;RORA;CD3G;AHR;CD3E;CD3D;IL27RA;IKBKB;PPP3CA;PPP3CB;PPP3CC;HLA-DOA;JAK2;HLA-DOB;IL6R;JAK3;HLA-DPA1;JAK1;HSP90AA1;IL4R;CHUK;IL1R1;IFNGR1;IFNGR2;FOS;FOXP3;RUNX1;TGFBR2;ZAP70;IFNG;IL23A;IRF4;LCK;IL1B;RARA;IL6ST;HLA-DQB1;GATA3;IL2RG;MAPK9;PPP3R1;HLA-DMA;MAPK8;HLA-DMB;RXRA;TBX21;IL21R;MAPK1;PLCG1;IL12RB1;HLA-DQA2;RXRG;HLA-DQA1;MAPK3;STAT5A;STAT5B;HLA-DRB5;JUN;SMAD4;SMAD3;TGFB1;STAT1;STAT3;NF…
Pancreatic cancer	62/76	0.355498	0.999998	0	0	1.17186	1.21198	RB1;CDKN1A;ARAF;PIK3CD;PIK3CB;BRCA2;CASP9;IKBKB;CCND1;AKT2;RAC2;RAC3;POLK;RAC1;JAK1;RALBP1;CHUK;DDB2;TGFBR2;PIK3CA;RAF1;TP53;ARHGEF6;RALA;PIK3R3;PLD1;PLD2;MAPK9;MAPK8;ERBB2;E2F1;E2F2;MAPK1;BAK1;RALGDS;MAPK3;SMAD4;TGFB2;SMAD3;TGFB1;GADD45B;BAD;CDKN2A;EGF;GADD45A;STAT1;TGFB3;STAT3;BRAF;MTOR;NFKB1;GADD45G;VEGFA;MAPK10;CDK6;RAD51;RPS6KB1;CDK4;RPS6KB2;BAX;KRAS;BCL2L1
beta-Alanine metabolism	25/30	0.37933	0.999998	0	0	1.32282	1.28228	ECHS1;DPYS;ABAT;CNDP1;CNDP2;ALDH1B1;ALDH2;ALDH3B1;CARNS1;MLYCD;ACADS;HIBCH;AOC2;SMOX;GAD1;UPB1;ALDH3A2;HADHA;ALDH6A1;ACOX1;EHHADH;DPYD;ACOX3;ALDH7A1;ALDH9A1
TNF signaling pathway	90/112	0.423175	0.999998	0	0	1.08236	0.930795	CXCL6;CSF1;PIK3CD;TNFAIP3;CXCL1;PIK3CB;CXCL3;TNF;CXCL2;CX3CL1;CXCL5;ICAM1;RPS6KA4;IKBKB;CASP7;RPS6KA5;CASP8;CREB3L3;CREB3L4;CASP10;AKT2;CASP3;MAP3K8;DNM1L;JUNB;MAP3K7;MAP2K3;MAP2K4;EDN1;CHUK;RIPK3;IL15;TRAF2;FOS;TRAF1;TNFRSF1B;MMP9;CREB3;MMP14;CREB1;PIK3CA;TRAF3;IL1B;IRF1;TRAF5;LTA;PGAM5;BIRC2;ATF4;BIRC3;CREB5;CEBPB;PIK3R3;NOD2;PTGS2;SOCS3;MAPK9;BAG4;MAPK8;CCL5;CCL2;MAPK1;FADD;MAP2K7;MAP2K6;MAPK3…
Toxoplasmosis	90/112	0.423175	0.999998	0	0	1.08236	0.930795	ITGB1;CD40;CIITA;LAMC3;LAMC2;LAMC1;TNF;PIK3CG;CASP9;IKBKB;CASP8;AKT2;CASP3;HLA-DOA;CCR5;JAK2;HLA-DOB;MAP3K7;HLA-DPA1;JAK1;MAP2K3;IL10;CHUK;IFNGR1;PDPK1;IFNGR2;IRAK4;IFNG;PPIF;ITGA6;BIRC7;TLR4;BIRC2;BIRC3;HLA-DQB1;TLR2;LAMA2;LAMA4;LAMA3;GNAI3;LY96;XIAP;PIK3R6;GNAI1;PIK3R5;GNAI2;MAPK9;HLA-DMA;MAPK8;SOCS1;HLA-DMB;IRAK1;ALOX5;MAPK1;HLA-DQA2;LDLR;HLA-DQA1;MAP2K6;MAPK3;HLA-DRB5;TGFB2;TGFB1;TGFB3;BAD;IL…
Acute myeloid leukemia	54/67	0.450077	0.999998	0	0	1.09887	0.87727	ITGAM;SPI1;FLT3;ARAF;PIK3CD;PIK3CB;MPO;IKBKB;CCND1;AKT2;MYC;PIM1;PIM2;HRAS;MAP2K2;CHUK;DUSP6;RUNX1;CCNA2;PIK3CA;KIT;RARA;RAF1;SOS1;SOS2;PPARD;CEBPA;CSF1R;BCL2A1;CEBPE;LEF1;TCF7;PIK3R3;NRAS;MAPK1;CD14;FCGR1A;MAPK3;RUNX1T1;STAT5A;STAT5B;TCF7L2;TCF7L1;JUP;BAD;ZBTB16;STAT3;BRAF;MTOR;NFKB1;PML;RPS6KB1;RPS6KB2;KRAS
Proximal tubule bicarbonate reclamation	19/23	0.456851	0.999998	0	0	1.2565	0.984343	GLS2;ATP1A4;ATP1A3;ATP1B3;ATP1A1;ATP1B2;ATP1B1;SLC4A4;AQP1;GLS;GLUD1;SLC9A3;GLUD2;CA2;CA4;SLC25A10;PCK1;SLC38A3;PCK2
Fatty acid biosynthesis	15/18	0.46206	0.999998	0	0	1.32262	1.02114	OLAH;MECR;ACSL1;ACSL6;ACSL5;ACSL4;ACSL3;ACACB;HSD17B8;MCAT;ACACA;ACSBG1;HTD2;ACSBG2;CBR4
Pyruvate metabolism	38/47	0.466735	0.999998	0	0	1.1169	0.851069	FH;ACSS2;ADH1C;ADH1B;ADH1A;GLO1;ACACB;ACACA;ADH5;ACAT1;ADH6;LDHC;ADH4;LDHB;LDHA;ALDH1B1;ALDH2;LDHD;ME1;ME3;DLAT;ME2;ACSS1;PCK1;PCK2;PDHA1;PKLR;MDH2;ACOT12;ALDH3A2;GRHPR;PC;HAGH;ALDH7A1;DLD;LDHAL6A;ALDH9A1;LDHAL6B
Biosynthesis of unsaturated fatty acids	22/27	0.491011	0.999998	0	0	1.16386	0.827842	ELOVL1;HACD1;ACOT7;ELOVL4;ELOVL5;TECR;ELOVL3;SCD5;HSD17B4;HSD17B12;ELOVL7;HACD3;HACD2;HACD4;FADS2;SCP2;ACOX1;ACOT2;ACOX3;ACAA1;FADS1;ACOT4
Collecting duct acid secretion	22/27	0.491011	0.999998	0	0	1.16386	0.827842	ATP6V1A;ATP6V1G2;CLCNKB;SLC4A1;TCIRG1;ATP4B;CA2;ATP6V0A2;ATP6V1B2;ATP6V0A4;ATP6V0E2;ATP6V1E1;ATP6V1G3;ATP6V0D1;ATP6V1D;SLC12A7;ATP6V0C;ATP6V0D2;ATP6V1C1;ATP6V0A1;ATP6V1C2;ATP6V1B1
Fatty acid elongation	22/27	0.491011	0.999998	0	0	1.16386	0.827842	ELOVL1;HACD1;ACAA2;ECHS1;ACOT7;MECR;ELOVL4;ELOVL5;TECR;ELOVL3;HSD17B12;ELOVL7;HACD3;HACD2;HACD4;HADHB;HADHA;ACOT2;PPT1;THEM4;HADH;ACOT4
Histidine metabolism	18/22	0.49975	0.999998	0	0	1.1903	0.825646	AOC1;CARNMT1;MAOB;MAOA;HDC;HNMT;CNDP1;FTCD;CNDP2;ALDH3A2;ALDH1B1;ALDH2;AMDHD1;ALDH3B1;CARNS1;ALDH7A1;ASPA;ALDH9A1
Bladder cancer	33/41	0.503555	0.999998	0	0	1.0911	0.74856	RB1;CDKN1A;CXCL8;ARAF;TYMP;NRAS;RASSF1;RPS6KA5;CCND1;CDH1;MYC;ERBB2;E2F1;E2F2;MAPK1;HRAS;MAPK3;MAP2K2;CDKN2A;EGF;MMP1;DAPK2;MMP2;BRAF;MMP9;UPK3A;VEGFA;CDK4;KRAS;RAF1;FGFR3;TP53;HBEGF
Arginine and proline metabolism	40/50	0.519454	0.999998	0	0	1.058	0.692962	OAT;MAOB;MAOA;SAT2;SAT1;CNDP1;CNDP2;SRM;CKMT2;ALDH2;ALDH1B1;CARNS1;NOS1;CKB;PRODH;L3HYPDH;GAMT;ARG2;AOC1;CKM;GOT1;ARG1;SMOX;GOT2;PYCR1;HOGA1;PYCR3;PRODH2;AGMAT;ALDH3A2;ALDH4A1;GATM;DAO;P4HA1;P4HA2;P4HA3;LAP3;ALDH18A1;ALDH7A1;ALDH9A1
Systemic lupus erythematosus	107/135	0.530489	0.999998	0	0	1.0107	0.640736	CD86;CD80;H2AC19;H2AC15;H2AC16;TNF;H2AC17;H2AC18;H2AC11;H2AC12;H2AC13;H2AC14;SNRPD1;H4C2;H4C1;H4C4;HLA-DOA;H4C3;HLA-DOB;TRIM21;H4C6;H4C5;H2AC8;H2AC7;ACTN1;H2AC4;ACTN4;H4C15;H4C14;H4C13;H4C12;H4C11;SNRPB;MACROH2A2;MACROH2A1;C2;C3;C5;GRIN2A;C6;C7;H3C1;H3C3;H3C2;H3C4;HLA-DQA2;ELANE;H3C7;HLA-DQA1;H3C6;H4C8;HLA-DRB5;H4C9;GRIN2B;H2AC21;CD28;HLA-DRA;HLA-DRB1;H2AX;CD40;RO60;FCGR3A;C8G;FCGR3B;CTSG;H3-3A;H…
Glycosaminoglycan biosynthesis	42/53	0.568429	0.999998	0	0	1.00979	0.57041	B4GALT2;B4GALT3;HS3ST3A1;XYLT1;HS6ST1;HS6ST2;HS2ST1;HS6ST3;NDST2;NDST1;EXTL2;FUT8;CHST11;CHSY1;DSE;NDST3;CHST15;CHSY3;CHST14;EXTL3;ST3GAL1;ST3GAL2;ST3GAL3;CSGALNACT1;HS3ST3B1;CHST6;CHST7;CHPF2;B3GAT3;GLCE;CSGALNACT2;B3GALT6;HS3ST5;HS3ST1;HS3ST2;EXT1;B3GNT2;CHST4;B4GALT7;B4GALT4;CHST2;CHST3
Pertussis	60/76	0.578155	0.999998	0	0	0.991702	0.543367	ITGB1;CXCL6;CXCL8;ITGAM;ITGB2;CALML3;TNF;CXCL5;PYCARD;CASP7;CASP3;CFL2;CFL1;CASP1;IL10;TICAM2;FOS;IRAK4;TICAM1;RHOA;TIRAP;IRF3;IL23A;IL1B;IRF1;IRF8;SERPING1;ITGA5;TLR4;C1QB;C1QA;C1S;C1R;GNAI3;LY96;NOD1;GNAI1;C2;GNAI2;C3;MAPK9;C5;MAPK8;IRAK1;MAPK1;NLRP3;CD14;MAPK3;JUN;MAPK14;MAPK12;NFKB1;MAPK13;MAPK10;MAPK11;IL6;CALM1;CALM2;MYD88;C1QC
Legionellosis	45/57	0.586633	0.999998	0	0	0.99171	0.528934	HBS1L;RAB1A;CXCL8;ITGAM;SAR1B;ITGB2;CXCL1;NLRC4;CXCL3;CXCL2;TNF;HSPD1;CASP9;PYCARD;C3;BCL2L13;CASP7;CASP8;CASP3;HSF1;CASP1;CD14;CR1;APAF1;BNIP3;HSPA6;IL18;HSPA2;NFKB1;NFKB2;EEF1G;CLK1;NFKBIA;IL6;CR1L;IL1B;EEF1A2;CYCS;TLR5;TLR4;NAIP;HSPA1B;MYD88;TLR2;HSPA1A
Hematopoietic cell lineage	78/99	0.586866	0.999998	0	0	0.982201	0.523472	CSF3;CSF3R;ITGAM;CSF1;TFRC;FLT3;ITGB3;IL5RA;CD3G;CD3E;TNF;CD3D;ANPEP;CD38;CD37;CD36;HLA-DOA;HLA-DOB;IL6R;CD33;HLA-DPA1;IL11;CR2;IL4R;CR1;ITGA4;MME;IL1R1;CD8B2;FLT3LG;GP1BA;FCER2;CD8B;CD8A;IL1B;KIT;ITGA6;ITGA5;MS4A1;CD44;IL9R;HLA-DQB1;CSF1R;GYPA;CD1E;CD1D;CD1C;CD1B;CSF2RA;CD1A;HLA-DMA;HLA-DMB;THPO;CD19;CD14;FCGR1A;HLA-DQA2;HLA-DQA1;CD55;HLA-DRB5;EPOR;CD2;IL6;CD4;KITLG;IL5;IL7;CD5;CR1L;IL2RA;CD7;HL…
Phosphonate and phosphinate metabolism	2023-06-05	0.632879	0.999998	0	0	1.32241	0.604972	PCYT1A;PCYT2;CHPT1;CEPT1;SELENOI
Butanoate metabolism	22/28	0.633058	0.999998	0	0	0.969653	0.443319	ECHS1;ACSM3;HMGCS1;ACSM1;GAD1;ACSM2A;ABAT;ACSM5;ACSM4;ACSM2B;ACAT1;HMGCL;HADHA;ALDH5A1;BDH2;BDH1;OXCT1;EHHADH;OXCT2;L2HGDH;HADH;ACADS
Sphingolipid signaling pathway	93/119	0.649065	0.999998	0	0	0.945642	0.408727	PTEN;PIK3CD;PPP2R2A;PIK3CB;TNF;SMPD2;SPTLC1;PPP2R1B;SPTLC2;PPP2R5E;ADORA3;AKT2;SMPD1;RAC2;FCER1A;RAC3;RAC1;HRAS;CERS3;CERS4;ABCC1;CERS5;MAP2K2;CERS6;FCER1G;PRKCB;PDPK1;SPHK2;PRKCE;SPHK1;PPP2R5A;PRKCA;PPP2R5D;TRAF2;GAB2;PPP2R5C;RHOA;PLCB3;PLCB4;PIK3CA;RAF1;MS4A2;TP53;PLCB2;NSMAF;CERS2;OPRD1;ASAH1;ASAH2;ROCK1;SGMS1;ROCK2;GNAI3;PIK3R3;SGMS2;PLD1;PRKCZ;KNG1;GNAI1;PLD2;GNAI2;GNA13;PPP2CA;MAPK9;PPP2CB;…
Sulfur metabolism	2023-10-08	0.65004	0.999998	0	0	1.05788	0.45565	MPST;SELENBP1;TST;ETHE1;BPNT2;SUOX;PAPSS2;PAPSS1
Fc epsilon RI signaling pathway	53/68	0.657588	0.999998	0	0	0.934213	0.3916	PIK3CD;PIK3CB;TNF;AKT2;RAC2;FCER1A;RAC3;RAC1;HRAS;MAP2K3;VAV3;MAP2K4;PLA2G4F;FCER1G;MAP2K2;SYK;PDPK1;PLA2G4C;PLA2G4A;PRKCA;GAB2;VAV1;VAV2;PIK3CA;BTK;LCP2;MS4A2;RAF1;SOS1;SOS2;PIK3R3;MAPK9;MAPK8;NRAS;ALOX5;INPP5D;PLCG2;MAPK1;FYN;PLCG1;MAP2K7;MAP2K6;MAPK3;LYN;MAPK14;MAPK12;MAPK13;MAPK10;MAPK11;IL5;ALOX5AP;KRAS;LAT
Starch and sucrose metabolism	28/36	0.666749	0.999998	0	0	0.925486	0.375138	GPI;AMY2A;AMY2B;GBE1;TREH;PYGM;PYGL;GBA3;HK2;HK1;GYS1;HK3;UGP2;PGM2;ENPP3;GYG1;PGM1;MGAM;AMY1A;AGL;AMY1B;GAA;AMY1C;G6PC1;GCK;PGM2L1;MGAM2;HKDC1
FoxO signaling pathway	102/131	0.680493	0.999998	0	0	0.929725	0.357886	ARAF;FBXO25;IRS2;IGF1R;CCND2;CCND1;AKT2;TNFSF10;HOMER3;RAG2;SKP2;GABARAPL1;PRKAB2;USP7;MAP2K2;TPTEP2-CSNK1E;CSNK1E;ATG12;RAF1;AGAP2;PIK3R3;FOXO4;FOXO3;NLK;STK4;FOXO1;CCNB2;CCNB1;PCK1;PCK2;PLK4;PLK3;SMAD4;TGFB2;SMAD3;TGFB1;GADD45B;GADD45A;HOMER2;TGFB3;INSR;PLK2;PLK1;BRAF;FBXO32;G6PC1;GADD45G;IL6;BCL6;CDK2;ATM;IL7R;CDKN1A;CDKN1B;SETD7;PTEN;PIK3CD;PRKAG2;FASLG;PIK3CB;SLC2A4;GRM1;PRKAG3;IKBKB;HRAS;IL…
ErbB signaling pathway	66/85	0.684468	0.999998	0	0	0.918318	0.348147	GSK3B;CDKN1A;CDKN1B;ARAF;PIK3CD;CBLB;PIK3CB;AREG;CRKL;AKT2;MYC;NCK2;HRAS;NCK1;MAP2K4;MAP2K2;PRKCB;GAB1;NRG1;PRKCA;NRG2;BTC;NRG3;PIK3CA;NRG4;RAF1;SOS1;SOS2;HBEGF;CAMK2B;CAMK2D;SHC2;SHC1;CAMK2A;PIK3R3;CBL;MAPK9;MAPK8;NRAS;ERBB3;ERBB4;ERBB2;PLCG2;ABL2;MAPK1;PAK6;PLCG1;MAP2K7;PAK3;CAMK2G;PAK2;PAK5;MAPK3;PAK4;STAT5A;STAT5B;JUN;BAD;EGF;BRAF;MTOR;BUB1B-PAK6;MAPK10;RPS6KB1;RPS6KB2;KRAS
Asthma	24/31	0.685344	0.999998	0	0	0.906586	0.342539	IL10;CD40;HLA-DRB5;CCL11;FCER1G;PRG2;EPX;TNF;HLA-DMA;HLA-DMB;CD40LG;IL5;IL9;HLA-DPB1;FCER1A;HLA-DRA;HLA-DOA;MS4A2;HLA-DOB;HLA-DQA2;HLA-DQA1;HLA-DRB1;HLA-DPA1;HLA-DQB1
Arginine biosynthesis	17/22	0.695027	0.999998	0	0	0.899063	0.327084	ABHD14A-ACY1;ARG2;ACY1;GOT1;ARG1;GLS2;GPT2;GOT2;GPT;ASS1;GLS;GLUD1;GLUD2;ASL;NAGS;NOS1;GLUL
Phagosome	118/152	0.710784	0.999998	0	0	0.917222	0.313127	SCARB1;NCF1;TFRC;NCF2;NCF4;MPO;ACTB;ACTG1;COMP;TUBB6;LAMP1;TUBB3;LAMP2;TUBB1;ATP6V1E1;HLA-DOA;HLA-DOB;DYNC2H1;ATP6V1G2;HLA-B;TAP2;CYBB;TAP1;CYBA;HLA-A;HLA-F;HLA-E;DYNC1LI1;DYNC1LI2;ATP6V0D1;PLA2R1;ATP6V0D2;ATP6V1A;RAB5B;RAB5C;CORO1A;C3;CLEC7A;ATP6V0A2;ATP6V1H;ATP6V0A4;CD14;ATP6V1D;HLA-DQA2;ATP6V1C1;HLA-DQA1;ATP6V0A1;ATP6V1C2;MSR1;HLA-DRB5;M6PR;CD209;HLA-DRA;RAB5A;HLA-DRB1;TUBA8;ITGB1;ITGAM;ITGB3;…
Epithelial cell signaling in Helicobacter pylori infection	54/70	0.714627	0.999998	0	0	0.892192	0.299771	CXCL8;CXCL1;TCIRG1;CXCL3;CXCL2;IKBKB;CASP3;RAC1;ATP6V1E1;MAP2K4;ATP6V1G2;ATP6AP1;CHUK;ADAM10;ADAM17;ATP6V1B2;ATP6V0D1;ATP6V0C;ATP6V0D2;MET;ATP6V1B1;HBEGF;ATP6V1A;IGSF5;NOD1;MAPK9;MAPK8;CXCR1;CCL5;CXCR2;ATP6V0A2;PLCG2;ATP6V1H;ATP6V0A4;CSK;PLCG1;ATP6V0E2;ATP6V1G3;ATP6V1D;ATP6V1C1;JAM2;ATP6V0A1;ATP6V1C2;JAM3;LYN;JUN;MAPK14;MAPK12;NFKB1;MAPK13;MAPK10;NFKBIA;TJP1;MAPK11
Non-homologous end-joining	2013-10-01	0.718811	0.999998	0	0	0.881466	0.291022	FEN1;RAD50;DCLRE1C;MRE11;XRCC4;PRKDC;XRCC5;LIG4;POLL;NHEJ1
Pantothenate and CoA biosynthesis	16/21	0.734925	0.999998	0	0	0.846124	0.260595	PANK2;PANK1;DPYS;UPB1;COASY;PPCDC;ALDH3A2;VNN1;ALDH1B1;ALDH2;VNN2;DPYD;ENPP3;BCAT1;AASDHPPT;BCAT2
Allograft rejection	29/38	0.739939	0.999998	0	0	0.851885	0.256577	CD86;CD40;CD80;PRF1;FASLG;TNF;HLA-DMA;HLA-DMB;HLA-DOA;HLA-DOB;HLA-DQA2;HLA-DQA1;HLA-DPA1;IL10;HLA-DRB5;HLA-B;GZMB;HLA-A;HLA-F;HLA-E;CD40LG;IL5;IFNG;CD28;HLA-DPB1;FAS;HLA-DRA;HLA-DRB1;HLA-DQB1
GnRH secretion	49/64	0.747865	0.999998	0	0	0.863487	0.250872	PIK3CD;ARRB1;ARRB2;PIK3CB;AKT2;GPER1;HRAS;TRPC5;MAP2K2;PRKCB;TRPC4;TRPC1;PRKCA;PLCB3;PLCB4;PIK3CA;RAF1;PLCB2;HCN3;ITPR1;ITPR2;PIK3R3;CACNA1D;ITPR3;CACNA1C;CACNA1F;CACNA1H;CACNA1G;CACNA1I;NRAS;GNA11;KISS1R;SPP1;KCNN1;MAPK1;KCNN2;KCNN3;KCNN4;KCNJ3;MAPK3;KCNJ5;GABBR1;ESR2;KISS1;GNAQ;GNRH2;GNRH1;KRAS;HCN2
NF-kappa B signaling pathway	80/104	0.750859	0.999998	0	0	0.880939	0.252421	CD40;CXCL8;EDA;CCL4L2;TNFAIP3;CXCL1;TNFRSF13C;CXCL3;TNF;CXCL2;EDA2R;ICAM1;TNFSF13B;IKBKB;BLNK;TNFSF11;TRIM25;LBP;MAP3K7;CARD10;TICAM2;CSNK2A1;CHUK;SYK;IL1R1;PRKCB;CSNK2A3;CSNK2A2;TRAF2;IRAK4;TRAF1;TICAM1;TIRAP;EDAR;ZAP70;LCK;TRAF3;IL1B;TRAF5;BTK;LTA;LTB;TLR4;CARD11;BIRC2;BIRC3;CCL13;BCL2A1;LY96;XIAP;BCL10;TNFRSF11A;PTGS2;RELB;IRAK1;CCL4;PLCG2;CD14;PLCG1;CCL19;LYN;UBE2I;VCAM1;GADD45B;TNFSF14;CCL21…
Colorectal cancer	66/86	0.752304	0.999998	0	0	0.872192	0.248239	GSK3B;CDKN1A;ARAF;PIK3CD;PIK3CB;AREG;BBC3;CASP9;CCND1;AKT2;CASP3;MYC;RAC2;RAC3;POLK;RAC1;HRAS;APPL1;MAP2K2;AXIN2;FOS;RHOA;DDB2;TGFBR2;MSH6;PIK3CA;MSH3;BIRC5;RAF1;SOS1;SOS2;TP53;RALA;LEF1;TCF7;PIK3R3;MAPK9;MAPK8;NRAS;MAPK1;PMAIP1;BAK1;RALGDS;MAPK3;TCF7L2;JUN;SMAD4;TCF7L1;TGFB2;SMAD3;TGFB1;GADD45B;BAD;EGF;GADD45A;TGFB3;BRAF;MLH1;MTOR;GADD45G;MAPK10;RPS6KB1;RPS6KB2;BAX;CYCS;KRAS
Salmonella infection	193/249	0.758331	0.999998	0	0	0.910357	0.251837	CYFIP2;NCKAP1;ARPC5L;GCC2;ACTB;AKT2;MYC;TNFSF10;SKP1;DYNC2H1;DYNC1LI1;DYNC1LI2;MYL2;PFN4;PFN1;MYL9;NAIP;PFN3;PFN2;MYL12A;MYL12B;DYNC2LI1;RRAS;MYO6;NCKAP1L;SNX9;CD14;FADD;S100A10;GSDMD;JUN;ARPC1B;WASL;IKBKB;ACTR1A;TUBA1B;TUBA1A;RAC1;HRAS;ANXA2;RIPK3;RIPK2;TUBB;IL18;RHOG;RHOH;FOS;DYNLL1;DYNLL2;RHOA;RHOB;TUBB2B;TUBB2A;IL1B;RHOJ;TLR9;EXOC5;TLR6;RAB7B;TLR5;TLR4;EXOC2;ARF6;RAB7A;TLR2;DYNC1I2;AHNAK;STX1…
Neutrophil extracellular trap formation	146/189	0.764813	0.999998	0	0	0.896991	0.240505	NCF1;NCF2;HDAC11;NCF4;H2AC19;H2AC15;H2AC16;MPO;ACTB;H2AC17;ACTG1;H2AC18;H2AC11;H2AC12;H2AC13;H2AC14;AKT2;H4C2;H4C1;H4C4;H4C3;MAP3K7;H4C6;H4C5;H2AC8;MAP2K2;H2AC7;PRKCB;H2AC4;CYBB;CYBA;PRKCA;H4C15;H4C14;H4C13;H4C12;HAT1;H4C11;PPIF;VDAC2;VDAC1;PADI4;RAF1;C5AR1;FPR1;PIK3R3;FPR3;FPR2;MACROH2A2;AGER;MACROH2A1;C3;C5;CLEC7A;H3C1;PLCG2;H3C3;H3C2;PLCG1;ATG7;H3C4;ELANE;H3C7;H3C6;GSDMD;H4C8;H4C9;NFKB1;SELP;H…
Chronic myeloid leukemia	58/76	0.772909	0.999998	0	0	0.851612	0.219371	RB1;CDKN1A;CDKN1B;ARAF;PIK3CD;PIK3CB;CRKL;IKBKB;CCND1;AKT2;MYC;POLK;HRAS;MAP2K2;CHUK;GAB2;DDB2;RUNX1;TGFBR2;BCR;PIK3CA;RAF1;SOS1;SOS2;TP53;HDAC2;SHC2;CTBP2;HDAC1;SHC1;PIK3R3;CBL;NRAS;E2F1;E2F2;MAPK1;BAK1;MAPK3;STAT5A;STAT5B;SMAD4;TGFB2;SMAD3;TGFB1;GADD45B;BAD;CDKN2A;GADD45A;TGFB3;BRAF;NFKB1;GADD45G;NFKBIA;CDK6;CDK4;BAX;KRAS;BCL2L1
Endometrial cancer	44/58	0.782025	0.999998	0	0	0.830696	0.204242	GSK3B;CDKN1A;LEF1;TCF7;ARAF;PTEN;PIK3CD;PIK3R3;PIK3CB;FOXO3;CASP9;NRAS;CCND1;CDH1;AKT2;MYC;ERBB2;CTNNA1;MAPK1;CTNNA3;POLK;BAK1;HRAS;MAPK3;TCF7L2;TCF7L1;MAP2K2;GADD45B;PDPK1;BAD;EGF;GADD45A;BRAF;AXIN2;MLH1;DDB2;GADD45G;PIK3CA;BAX;KRAS;RAF1;SOS1;SOS2;TP53
Th1 and Th2 cell differentiation	70/92	0.800886	0.999998	0	0	0.840766	0.186681	MAML2;CD3G;CD3E;RBPJ;CD3D;IKBKB;PPP3CA;PPP3CB;PPP3CC;HLA-DOA;JAK2;HLA-DOB;JAK3;HLA-DPA1;JAK1;IL4R;CHUK;IFNGR1;IFNGR2;FOS;RUNX3;ZAP70;MAF;IFNG;LCK;HLA-DQB1;NOTCH2;GATA3;IL2RG;DLL1;DLL4;MAPK9;HLA-DMA;MAPK8;PPP3R1;HLA-DMB;TBX21;STAT4;MAPK1;PLCG1;IL12RB1;HLA-DQA2;HLA-DQA1;MAPK3;STAT5A;STAT5B;HLA-DRB5;JUN;STAT1;NFATC3;NFATC2;NFATC1;MAPK14;MAPK12;NFKB1;MAPK13;MAPK10;NFKBIA;MAPK11;CD4;IL5;IL2RA;IL2RB;HL…
Amino sugar and nucleotide sugar metabolism	36/48	0.811439	0.999998	0	0	0.792916	0.165677	GPI;GALT;HEXB;UAP1;NPL;HK2;HK1;CYB5R2;GMPPB;CYB5R1;HK3;NANP;CYB5R4;UGP2;GMDS;FPGT;GMPPA;UAP1L1;GNPNAT1;PGM2;GFUS;NANS;PGM1;PMM1;GFPT2;PMM2;RENBP;GCK;CHIT1;UGDH;GNPDA1;NAGK;GNPDA2;FCSK;HKDC1;GALK1
Inflammatory bowel disease	49/65	0.814429	0.999998	0	0	0.809325	0.166128	IL23R;RORC;RORA;TNF;IL18RAP;HLA-DOA;HLA-DOB;HLA-DPA1;IL10;IL4R;IFNGR1;IFNGR2;IL18;FOXP3;MAF;IFNG;IL23A;IL1B;TLR5;TLR4;HLA-DQB1;TLR2;GATA3;NOD2;IL2RG;HLA-DMA;HLA-DMB;TBX21;IL21R;STAT4;IL12RB1;HLA-DQA2;HLA-DQA1;HLA-DRB5;JUN;TGFB2;SMAD3;TGFB1;STAT1;TGFB3;STAT3;NFATC1;NFKB1;IL6;IL5;HLA-DPB1;HLA-DRA;HLA-DRB1;IL18R1
C-type lectin receptor signaling pathway	79/104	0.818772	0.999998	0	0	0.834876	0.166933	PIK3CD;CALML3;CBLB;LSP1;PIK3CB;TNF;PYCARD;IKBKB;PPP3CA;PPP3CB;CASP8;PPP3CC;AKT2;CASP1;CLEC1B;HRAS;IKBKE;IL10;ARHGEF12;FCER1G;CHUK;SYK;PRKCD;RRAS2;RHOA;MRAS;PIK3CA;IL23A;IL1B;IRF1;CLEC4E;RAF1;IRF9;ITPR1;ITPR2;PIK3R3;ITPR3;BCL10;PTGS2;RELB;MAPK9;PPP3R1;MAPK8;NRAS;RRAS;CLEC7A;PLCG2;NLRP3;MAPK1;CCL17;MAPK3;PLK3;EGR2;JUN;EGR3;CCL22;STAT1;STAT2;CARD9;NFATC3;NFATC2;NFATC1;MAPK14;NFKB1;MAPK12;NFATC4;NFKB…
Type I diabetes mellitus	32/43	0.828032	0.999998	0	0	0.768877	0.14509	CD86;CD80;ICA1;PRF1;FASLG;TNF;HSPD1;HLA-DMA;HLA-DMB;HLA-DOA;HLA-DOB;HLA-DQA2;HLA-DQA1;HLA-DPA1;HLA-DRB5;PTPRN2;GAD1;HLA-B;GZMB;HLA-A;HLA-F;HLA-E;IFNG;IL1B;CD28;HLA-DPB1;LTA;CPE;FAS;HLA-DRA;HLA-DRB1;HLA-DQB1
IL-17 signaling pathway	71/94	0.835974	0.999998	0	0	0.815556	0.146113	CXCL6;GSK3B;CSF3;CXCL8;TRAF3IP2;TNFAIP3;CXCL1;CXCL3;CXCL2;TNF;CXCL5;IKBKB;CASP8;TBK1;CASP3;IKBKE;MAP3K7;HSP90AA1;CHUK;MMP1;TRAF2;FOS;IL17RE;IL17RC;MMP9;MUC5AC;IL17RA;MMP13;IFNG;TRAF3;IL1B;TRAF5;S100A9;S100A8;CEBPB;CCL11;SRSF1;PTGS2;MAPK9;MAPK8;MAPK7;CCL2;MAPK1;FADD;MAPK6;CCL17;MAPK4;MAPK3;USP25;JUN;JUND;CCL20;MAPK14;MUC5B;MAPK15;MAPK12;NFKB1;MAPK13;FOSL1;MAPK10;NFKBIA;CXCL10;MAPK11;IL6;IL5;LCN2;F…
Mitophagy	51/68	0.836779	0.999998	0	0	0.792719	0.141258	CALCOCO2;CITED2;TBK1;USP30;HRAS;BNIP3L;USP8;GABARAPL1;CSNK2A1;CSNK2A3;ATG9A;CSNK2A2;TFE3;TFEB;RRAS2;MRAS;TAX1BP1;PGAM5;ULK1;RAB7B;SQSTM1;TP53;UBA52;OPTN;ATF4;RAB7A;PRKN;BECN1;USP15;FOXO3;BCL2L13;MAPK9;MAPK8;NRAS;RHOT1;RRAS;UBC;E2F1;MFN2;RPS27A;TBC1D17;TBC1D15;JUN;BNIP3;EIF2AK3;MAPK10;PINK1;NBR1;TOMM7;KRAS;BCL2L1
Chagas disease	77/102	0.845448	0.999998	0	0	0.813637	0.136601	CXCL8;SERPINE1;PIK3CD;PPP2R2A;CD3G;FASLG;PIK3CB;CD3E;TNF;CD3D;IKBKB;CASP8;PPP2R1B;AKT2;IL10;MAP2K4;CHUK;IFNGR1;IFNGR2;FOS;IRAK4;TICAM1;TGFBR2;PLCB3;PLCB4;IFNG;PIK3CA;IL1B;TLR9;TLR6;PLCB2;TLR4;TLR2;C1QB;C1QA;CCL3L3;GNAI3;PIK3R3;KNG1;GNAI1;GNAI2;C3;PPP2CA;GNA14;MAPK9;PPP2CB;GNA15;MAPK8;IRAK1;CCL5;GNA11;CCL3;CCL2;MAPK1;FADD;MAPK3;JUN;TGFB2;ACE;TGFB1;TGFB3;MAPK14;NFKB1;MAPK12;MAPK13;GNAO1;NFKBIA;MAPK…
Type II diabetes mellitus	34/46	0.851759	0.999998	0	0	0.74877	0.120141	PIK3CD;PIK3R3;SLC2A2;CACNA1D;IRS2;CACNA1C;PIK3CB;SLC2A4;CACNA1E;PRKCZ;TNF;HK2;CACNA1G;HK1;IKBKB;HK3;MAPK9;SOCS3;MAPK8;SOCS1;MAPK1;MAPK3;PKLR;ABCC8;INSR;PRKCE;ADIPOQ;PRKCD;MAFA;GCK;MTOR;MAPK10;PIK3CA;HKDC1
Long-term potentiation	50/67	0.852654	0.999998	0	0	0.777126	0.123875	ARAF;CALML3;GRM1;PPP1CB;PPP3CA;RPS6KA3;GRM5;PPP3CB;RPS6KA6;PPP3CC;RPS6KA2;PRKACA;HRAS;PRKACB;MAP2K2;PRKCB;PRKCA;PLCB3;PLCB4;RAF1;PLCB2;ATF4;CAMK2B;GRIA2;CAMK2D;CAMK2A;ITPR1;ITPR2;ITPR3;CACNA1C;ADCY8;RAP1B;GRIN2A;NRAS;PPP3R1;RAP1A;MAPK1;CAMK2G;MAPK3;BRAF;GRIN2B;GRIN1;GRIN2D;PPP1CA;PPP1R1A;CAMK4;GNAQ;KRAS;CALM1;CALM2
Fc gamma R-mediated phagocytosis	73/97	0.853754	0.999998	0	0	0.803499	0.127043	NCF1;ARPC1B;ARPC5L;INPPL1;PIK3CD;PIK3CB;CRKL;FCGR3A;FCGR3B;AKT2;CFL2;CFL1;RAC2;RAC1;ACTR3;VAV3;ACTR2;PLA2G4F;SYK;PRKCB;SPHK2;PRKCE;SPHK1;PRKCD;PLA2G4C;PLA2G4A;PRKCA;GAB2;VAV1;DNM2;VAV2;HCK;PIK3CA;BIN1;AMPH;PLPP3;RAF1;PLPP2;ARF6;ASAP3;WAS;PIK3R3;ASAP1;ASAP2;PLA2G6;PLD1;PLD2;SCIN;INPP5D;PLCG2;MAPK1;PIP5K1B;PLCG1;FCGR1A;WASF1;MAPK3;LYN;VASP;MARCKSL1;MYO10;LIMK2;LIMK1;ARPC4;ARPC5;MARCKS;PTPRC;FCGR2A;…
Vibrio cholerae infection	37/50	0.854839	0.999998	0	0	0.752121	0.117964	ERO1A;ATP6V1A;ADCY3;TCIRG1;ACTB;ACTG1;SEC61G;ATP6V0A2;PLCG2;ATP6V1H;ATP6V0A4;PLCG1;ATP6V1E1;PRKACA;ATP6V0E2;ATP6V1G3;PRKACB;ATP6V1D;ATP6V1C1;ATP6V0A1;ATP6V1C2;SLC12A2;ATP6V1G2;ATP6AP1;PRKCA;PDIA4;TJP1;ADCY9;KCNQ1;ATP6V1B2;KDELR3;ATP6V0D1;ATP6V0C;ATP6V0D2;CFTR;ATP6V1B1;TJP2
Synthesis and degradation of ketone bodies	2023-10-07	0.862513	0.999998	0	0	0.616909	0.0912442	HMGCL;BDH2;BDH1;HMGCS1;OXCT1;OXCT2;ACAT1
Aldosterone-regulated sodium reabsorption	27/37	0.866796	0.999998	0	0	0.713559	0.102004	ATP1A4;ATP1A3;NEDD4L;PIK3CD;PIK3R3;ATP1A1;PIK3CB;NR3C2;HSD11B2;MAPK1;SFN;KCNJ1;MAPK3;PDPK1;PRKCB;INSR;ATP1B3;PRKCA;ATP1B2;ATP1B1;SCNN1G;FXYD4;PIK3CA;SCNN1B;SCNN1A;KRAS;SGK1
Chemokine signaling pathway	146/192	0.87015	0.999998	0	0	0.837884	0.116541	NCF1;CCL4L2;CXCL13;CXCL14;CRKL;CXCL16;PREX1;AKT2;PRKACA;PRKACB;PRKCB;PRKCD;TIAM1;ADCY9;ELMO1;RAF1;SHC2;SHC1;CCL3L3;PXN;PIK3R3;FOXO3;RASGRP2;PRKCZ;PIK3R6;PIK3R5;GRK1;RAP1B;GNG10;GRK3;GRK2;RAP1A;GRK5;GRK6;PLCG2;PLCG1;LYN;STAT5B;XCR1;BRAF;PPBP;GNG12;GNG11;NFKB1;NFKBIA;CXCL10;CXCL11;CXCL12;GNAQ;GNB2;GNB4;GNB3;GNB5;NFKBIB;CXCL6;GSK3B;ITK;GSK3A;CXCL8;PIK3CD;ARRB1;CXCL1;ARRB2;PIK3CB;CXCL3;CXCL2;CX3CL1;C…
Coronavirus disease	177/232	0.870595	0.999998	0	0	0.849402	0.117709	RPL4;RPL5;RPL30;CSF3;RPL3;RPL32;RPL31;RPL34;F13A1;RPL8;RPL10A;RPL9;TNF;RPL6;RPL7;RPS15;RPS14;RPS17;RPS16;TBK1;RPL18A;RPS19;RPS18;C3AR1;RPL36;RPL35;RPL38;RPL37;RPS11;RPL39;RPS10;IL6R;MAP3K7;RPS13;RPS12;IFNAR2;RPS9;RPL21;RPL36A-HNRNPH2;RPS7;PRKCB;RPS8;RPL23;RPS5;RPS6;CYBB;PRKCA;RPSA;ACE2;ADAM17;AGTR1;RPL24;RPL27;MASP2;RPL26;RPL29;IL6ST;RPL28;UBA52;CFB;IFNAR1;CFD;C5AR1;PIK3R3;C2;C3;C5;C6;C7;IRAK1;PL…
Nitrogen metabolism	2017-12-01	0.874758	0.999998	0	0	0.634432	0.084892	CA12;GLUD1;GLUD2;CA3;CA5B;CA2;CA4;CA9;CA8;GLUL;CA14;CA13
DNA replication	26/36	0.885871	0.999998	0	0	0.687088	0.0832639	PRIM2;FEN1;RNASEH2B;RNASEH2A;MCM7;PRIM1;POLD3;POLD1;POLD2;POLE;RFC5;RFC4;LIG1;RFC1;RFC2;RPA1;RPA2;POLE4;POLA2;POLE2;RPA4;MCM3;MCM5;DNA2;MCM6;MCM2
Arrhythmogenic right ventricular cardiomyopathy	57/77	0.889293	0.999998	0	0	0.752827	0.0883283	ITGB1;RYR2;ITGB4;ITGB3;ATP2A3;ATP2A2;ATP2A1;ACTB;SLC8A1;ACTG1;GJA1;SGCD;CDH2;SGCB;DAG1;ITGB8;ITGAV;ITGB7;ITGB6;SGCG;DSP;ITGA4;ACTN2;CACNA2D1;CACNA2D3;CACNA2D2;CACNA2D4;CACNB1;CACNB2;CACNB3;CACNB4;ITGA8;PKP2;DSG2;ITGA6;ITGA5;ITGA9;LAMA2;LEF1;TCF7;CACNA1D;CACNA1C;CACNA1F;CACNG8;LMNA;CTNNA1;CTNNA3;DMD;CACNG4;CACNG5;TCF7L2;TCF7L1;JUP;SLC8A3;DES;ITGA10;ITGA11
Phenylalanine, tyrosine and tryptophan biosynthesis	2023-06-04	0.889588	0.999998	0	0	0.528805	0.0618686	IL4I1;GOT1;PAH;GOT2
Tuberculosis	136/180	0.89483	0.999998	0	0	0.815845	0.0906581	CALML3;TNF;LAMP1;AKT2;LAMP2;HLA-DOA;HLA-DOB;IL23A;RFX5;ATP6V0D1;CLEC4E;PLA2R1;RAF1;ATP6V0D2;RAB5B;RAB5C;BCL10;CORO1A;C3;CYP27B1;PPP3R1;IRAK1;CLEC7A;IRAK2;ATP6V0A2;ATP6V1H;ATP6V0A4;CD14;FADD;HLA-DQA2;HLA-DQA1;ATP6V0A1;HSPA9;PLK3;HLA-DRB5;TGFB2;TGFB1;TGFB3;VDR;RFXANK;NFKB1;IL6;CD209;RFXAP;CYCS;HLA-DRA;CALM1;CALM2;RAB5A;HLA-DRB1;MYD88;CIITA;ITGAM;ITGB2;LSP1;TCIRG1;CTSS;CASP9;EEA1;MRC2;PPP3CA;FCGR3A;…
One carbon pool by folate	14/20	0.894843	0.999998	0	0	0.616739	0.0685237	ALDH1L1;SHMT2;SHMT1;AMT;MTHFR;MTR;TYMS;ALDH1L2;FTCD;DHFR;MTHFD1;MTHFD1L;MTHFD2;GART
Nicotinate and nicotinamide metabolism	25/35	0.903287	0.999998	0	0	0.660619	0.0671949	NNMT;QPRT;NT5C2;NT5C;NADK2;PNP;NNT;NAPRT;NMRK1;NAMPT;ASPDH;AOX1;CD38;NT5M;ENPP3;NUDT12;SIRT5;SIRT6;NMNAT2;SIRT7;SIRT1;SIRT2;SIRT3;NMNAT1;NT5C1B
Galactose metabolism	22/31	0.904736	0.999998	0	0	0.645971	0.0646694	B4GALT2;MGAM;GALT;GAA;AKR1B1;G6PC1;HK2;GCK;HK1;HK3;MGAM2;PFKL;UGP2;AKR1B10;HKDC1;PGM2;GALM;LCT;PFKM;PGM1;PFKP;GALK1
Basal cell carcinoma	46/63	0.906984	0.999998	0	0	0.714774	0.0697834	GSK3B;CDKN1A;WNT2B;LEF1;TCF7;WNT8B;FZD10;GLI1;GLI3;GLI2;SHH;WNT11;DVL1;POLK;BAK1;WNT1;WNT2;WNT3;WNT4;TCF7L2;WNT10B;TCF7L1;WNT10A;FZD2;WNT5B;FZD5;GADD45B;FZD4;GADD45A;WNT3A;FZD7;PTCH1;WNT7B;WNT5A;PTCH2;WNT9B;WNT7A;AXIN2;KIF7;WNT16;DDB2;GADD45G;BMP4;SMO;BAX;TP53
Adherens junction	52/71	0.909895	0.999998	0	0	0.72288	0.068259	CTNND1;PTPRM;WASL;ACTB;ACTG1;IGF1R;CDH1;RAC2;RAC3;RAC1;MAP3K7;CSNK2A1;ACTN1;CSNK2A3;CSNK2A2;LMO7;ACTN4;RHOA;TGFBR2;MET;SSX2IP;VCL;LEF1;TCF7;WAS;IQGAP1;NLK;ERBB2;CTNNA1;MAPK1;CTNNA3;FYN;WASF1;MAPK3;FARP2;TCF7L2;SMAD4;TCF7L1;SMAD3;YES1;INSR;BAIAP2;TJP1;AFDN;FER;PTPRB;SNAI1;SNAI2;PTPN6;NECTIN4;NECTIN3;NECTIN1
Mismatch repair	16/23	0.911236	0.999998	0	0	0.604085	0.0561517	RFC5;RFC4;LIG1;RFC1;RFC2;RPA1;RPA2;MLH1;MSH6;POLD3;EXO1;MSH3;POLD1;POLD2;RPA4;PMS2
Viral protein interaction with cytokine and cytokine receptor	74/100	0.912919	0.999998	0	0	0.751538	0.0684711	CXCL6;CXCL8;CSF1;CCL4L2;IL24;CXCL1;CXCL13;CXCL3;CXCL14;TNF;CXCL2;CX3CL1;CXCL5;IL18RAP;TNFSF10;CCR7;CCR6;CCR5;IL6R;CCR4;PF4V1;CCR2;IL10;IL18;IL19;TNFRSF1B;LTA;XCL2;XCL1;IL6ST;CCL14;CX3CR1;CSF1R;CCL13;CCL11;CCL3L3;IL20RB;CXCR4;IL2RG;CCL8;CXCR1;CCL5;CXCR3;CCL4;CXCR2;CCL3;CCL2;CCL19;CCL18;CCL17;CCL24;XCR1;CCL22;TNFSF14;CCL21;CCL20;IL10RB;IL10RA;IL34;TNFRSF10C;TNFRSF10B;TNFRSF10A;PPBP;CXCL10;CXCL11;IL…
Cysteine and methionine metabolism	36/50	0.916467	0.999998	0	0	0.679316	0.059256	AHCYL2;DNMT1;AHCYL1;AHCY;MRI1;MTR;SRM;LDHC;IL4I1;LDHB;LDHA;MAT2A;PHGDH;MPST;SDS;GOT1;AGXT2;MDH2;BHMT2;GSS;DNMT3A;GOT2;BHMT;GCLC;TST;ADI1;PSAT1;CTH;KYAT3;KYAT1;BCAT1;CDO1;GCLM;LDHAL6A;BCAT2;LDHAL6B
Central carbon metabolism in cancer	51/70	0.920219	0.999998	0	0	0.708934	0.0589437	RET;FLT3;PTEN;PIK3CD;SLC2A2;PIK3CB;HK2;GLS;HK1;HK3;AKT2;MYC;HRAS;SLC16A3;PDK1;PDGFRB;PDGFRA;MAP2K2;SIRT6;SIRT3;SLC7A5;PIK3CA;SCO2;HKDC1;KIT;RAF1;MET;TP53;GLS2;PIK3R3;SLC1A5;LDHC;LDHB;LDHA;NRAS;ERBB2;MAPK1;MAPK3;TIGAR;PDHA1;IDH1;IDH2;GCK;MTOR;PFKL;KRAS;FGFR3;PFKM;LDHAL6A;PFKP;LDHAL6B
Ascorbate and aldarate metabolism	21/30	0.921323	0.999998	0	0	0.61657	0.0505245	UGT2B10;UGT1A10;KL;MIOX;UGT1A1;UGT2B28;ALDH3A2;UGDH;ALDH1B1;ALDH2;UGT1A5;RGN;UGT1A4;UGT2A3;UGT1A3;UGT1A8;ALDH7A1;UGT1A7;UGT2B7;UGT1A6;ALDH9A1
Cell cycle	92/124	0.924213	0.999998	0	0	0.758927	0.0598128	RB1;CDKN1C;YWHAE;GSK3B;CDKN1A;CDKN1B;MCM7;CCNH;YWHAB;BUB1B;SMC3;CDC14A;CDC14B;CDC20;CCND3;CCND2;CDC23;CCND1;PTTG1;YWHAQ;PTTG2;CHEK2;MYC;CDC27;CHEK1;SKP2;SKP1;YWHAH;ANAPC7;CDC25C;YWHAZ;CDC25B;RBX1;SMC1B;CCNA2;RBL2;DBF4;RBL1;TFDP1;ESPL1;TFDP2;MCM3;ANAPC4;MCM5;MCM6;TP53;ANAPC2;MCM2;HDAC2;PRKDC;HDAC1;TTK;PKMYT1;CCNB2;ORC4;CCNB1;FZR1;ORC6;CDC45;ORC3;RAD21;ORC2;E2F1;E2F2;SFN;BUB3;BUB1;CDKN2D;SMAD4;TGFB…
ABC transporters	32/45	0.928656	0.999998	0	0	0.650277	0.0481315	ABCD4;ABCD2;ABCB1;ABCD3;ABCB6;ABCB7;ABCB8;DEFB1;ABCA12;ABCA13;ABCC11;ABCA1;ABCC3;ABCC4;ABCC1;ABCG5;ABCC2;ABCA5;ABCA6;ABCC8;ABCC6;ABCA9;TAP2;TAP1;ABCA7;ABCC9;ABCA8;ABCB10;ABCG4;ABCG1;CFTR;ABCG2
Ferroptosis	29/41	0.929542	0.999998	0	0	0.638454	0.0466476	TFRC;ALOX15;SLC40A1;SAT2;SLC3A2;SLC7A11;SAT1;MAP1LC3B;MAP1LC3C;PCBP1;PCBP2;ATG7;PRNP;ACSL1;GSS;NCOA4;SLC11A2;ACSL6;MAP1LC3B2;ACSL5;CYBB;ACSL4;ACSL3;CP;SLC39A14;GCLC;VDAC2;GCLM;TP53
p53 signaling pathway	53/73	0.930502	0.999998	0	0	0.699819	0.0504087	CDKN1A;CD82;GORAB;SERPINE1;PTEN;BBC3;CASP9;TP53AIP1;CCND3;CASP8;CCND2;CCND1;SESN3;CASP3;CHEK2;CHEK1;SESN2;GTSE1;APAF1;SHISA5;DDB2;RRM2B;TP53;PPM1D;RCHY1;CCNB2;CCNB1;COP1;ZMAT3;PERP;PMAIP1;SFN;BID;RPRM;GADD45B;CDKN2A;GADD45A;TNFRSF10B;TNFRSF10A;GADD45G;CDK6;TP53I3;CDK4;CCNG2;CCNG1;CDK2;CDK1;BAX;CYCS;FAS;ATM;BCL2L1;TP73
African trypanosomiasis	26/37	0.930957	0.999998	0	0	0.624475	0.0446762	LAMA4;HBB;FASLG;HPR;TNF;KNG1;ICAM1;APOL1;IL10;VCAM1;PRKCB;IL18;PRKCA;SELE;IL6;PLCB3;PLCB4;IFNG;GNAQ;IL1B;TLR9;FAS;IDO2;PLCB2;MYD88;IDO1
Sulfur relay system	2023-08-05	0.934975	0.999998	0	0	0.440594	0.0296237	MPST;MOCS2;NFS1;MOCS3;TST
Intestinal immune network for IgA production	34/48	0.938772	0.999998	0	0	0.641495	0.0405311	CD86;PIGR;CD40;TNFRSF13B;CD80;CXCR4;TNFRSF13C;TNFSF13B;HLA-DMA;HLA-DMB;ITGB7;HLA-DOA;ICOS;HLA-DOB;HLA-DQA2;HLA-DQA1;ICOSLG;HLA-DPA1;IL10;IL15RA;HLA-DRB5;TGFB1;ITGA4;IL15;IL6;CD40LG;CXCL12;IL5;CD28;HLA-DPB1;HLA-DRA;CCL28;HLA-DRB1;HLA-DQB1
Taurine and hypotaurine metabolism	2023-11-07	0.940263	0.999998	0	0	0.462571	0.0284923	GGT5;GGT7;GGT6;GAD1;CDO1;CSAD;GGT1
Glycine, serine and threonine metabolism	28/40	0.940999	0.999998	0	0	0.6164	0.0374851	DMGDH;MAOB;GLDC;MAOA;SHMT2;SHMT1;GCSH;SRR;PHGDH;PSPH;GAMT;AOC2;SDS;AGXT2;GLYCTK;AMT;PIPOX;GRHPR;BHMT;GATM;DAO;PSAT1;CHDH;CTH;SARDH;AGXT;ALDH7A1;DLD
Gap junction	64/88	0.941592	0.999998	0	0	0.704035	0.0423715	GUCY1B1;HTR2B;HTR2A;GRM1;GJA1;GRM5;TUBA1B;TUBB6;TUBA1A;TUBB3;TUBB1;PRKACA;HRAS;PRKACB;PDGFRB;GUCY1A2;PDGFRA;GUCY1A1;MAP2K2;PRKCB;TUBB;PRKCA;GJD2;PLCB3;TUBB2B;ADCY9;PLCB4;TUBB2A;RAF1;SOS1;PLCB2;SOS2;TUBAL3;GNAI3;ITPR1;LPAR1;ADCY3;ITPR2;ADCY2;ADRB1;ITPR3;ADCY8;ADCY7;GNAI1;GNAI2;TUBA3E;NRAS;TUBA3D;MAPK7;GNA11;PDGFD;PDGFC;MAPK1;MAP2K5;MAPK3;MAP3K2;EGF;TUBB4B;TUBB4A;TJP1;GNAQ;CDK1;KRAS;TUBA8
Apoptosis	105/142	0.943841	0.999998	0	0	0.748834	0.0432804	PRF1;TNF;ACTB;ACTG1;TP53AIP1;AKT2;TNFSF10;CAPN1;DAXX;ENDOG;MAP2K2;ERN1;DDIT3;RAF1;TP53;ATF4;ITPR1;HTRA2;ITPR2;PIK3R3;CSF2RB;ITPR3;SPTA1;PMAIP1;FADD;MCL1;NGFR;JUN;GADD45B;GADD45A;EIF2AK3;TNFRSF10B;TNFRSF10A;NFKB1;GADD45G;NFKBIA;CYCS;ATM;BCL2L1;TUBA8;HRK;CTSZ;PIK3CD;CTSW;FASLG;CTSV;PIK3CB;CTSS;LMNB2;BBC3;LMNB1;CASP9;IKBKB;CASP7;CTSO;TUBA1B;CASP8;TUBA1A;AIFM1;CASP10;CASP6;CTSL;CASP3;CTSK;CASP2;CTSF;…
Glioma	54/75	0.94684	0.999998	0	0	0.67895	0.0370879	RB1;CDKN1A;ARAF;PTEN;PIK3CD;CALML3;PIK3CB;IGF1R;CCND1;AKT2;POLK;HRAS;PDGFRB;PDGFRA;CAMK1D;MAP2K2;PRKCB;PRKCA;DDB2;PIK3CA;RAF1;SOS1;SOS2;TP53;CAMK1G;CAMK2B;CAMK2D;SHC2;SHC1;CAMK2A;PIK3R3;NRAS;E2F1;PLCG2;E2F2;MAPK1;BAK1;PLCG1;CAMK2G;MAPK3;GADD45B;CDKN2A;EGF;GADD45A;BRAF;MTOR;GADD45G;CDK6;CDK4;CAMK4;BAX;KRAS;CALM1;CALM2
Other types of O-glycan biosynthesis	33/47	0.948249	0.999998	0	0	0.622588	0.0330834	B4GALT2;POMT2;B4GALT3;GALNT11;GALNT14;GALNT13;POGLUT1;GALNT16;GALNT18;GALNT17;POMT1;B3GLCT;GXYLT1;GXYLT2;RFNG;GALNT10;LFNG;C1GALT1C1;POFUT2;POFUT1;XXYLT1;COLGALT1;ST3GAL3;GALNT7;GALNT6;GALNT5;ST6GAL1;GALNT2;GALNT1;C1GALT1;MFNG;EOGT;OGT
Phenylalanine metabolism	2017-11-01	0.953146	0.999998	0	0	0.484489	0.0232494	IL4I1;DDC;AOC2;GOT1;MAOB;MAOA;ALDH3B1;PAH;GOT2;GLYAT;HPD
Fanconi anemia pathway	38/54	0.954711	0.999998	0	0	0.627202	0.029069	MUS81;BLM;FAAP24;BRCA1;BRCA2;EME1;REV3L;USP1;POLI;PMS2;HES1;POLK;ATRIP;POLH;FANCI;CENPX;FANCM;TOP3A;REV1;FANCA;RPA1;RPA2;FANCC;FANCB;FANCE;MLH1;FANCG;FANCF;RAD51C;RAD51;FANCD2;ERCC4;ERCC1;UBE2T;RPA4;CENPS-CORT;FAN1;CENPS
Hypertrophic cardiomyopathy	65/90	0.954757	0.999998	0	0	0.686313	0.0317755	ITGB1;RYR2;ITGB4;ITGB3;ATP2A3;ATP2A2;PRKAG2;ATP2A1;TNF;ACTB;PRKAG3;SLC8A1;ACTG1;SGCD;SGCB;DAG1;ITGB8;ITGAV;ITGB7;ITGB6;SGCG;EDN1;PRKAB2;ITGA4;TPM4;TPM3;CACNA2D1;TNNC1;TPM2;TPM1;CACNA2D3;CACNA2D2;CACNA2D4;CACNB1;CACNB2;CACNB3;CACNB4;MYL2;TNNT2;ITGA8;ITGA6;ITGA5;ITGA9;MYH7;PRKAA1;PRKAA2;LAMA2;CACNA1D;CACNA1C;CACNA1F;TTN;CACNG8;LMNA;DMD;CACNG4;CACNG5;TGFB2;ACE;TGFB1;TGFB3;SLC8A3;IL6;DES;ITGA10;ITGA11
Circadian rhythm	21/31	0.956155	0.999998	0	0	0.55478	0.0248734	PRKAA1;PRKAB2;PRKAA2;TPTEP2-CSNK1E;BHLHE41;RORC;PRKAG2;RORA;CSNK1E;NR1D1;PRKAG3;RBX1;PER1;CREB1;PER3;BHLHE40;CRY2;CRY1;FBXL3;BTRC;SKP1
Leukocyte transendothelial migration	83/114	0.958062	0.999998	0	0	0.706536	0.0302703	ITGB1;ITK;ITGAM;NCF1;NCF2;CTNND1;NCF4;ITGB2;PIK3CD;PIK3CB;CLDN2;ARHGAP5;ITGAL;CLDN1;ACTB;ARHGAP35;ACTG1;ICAM1;CLDN22;RASSF5;CLDN24;CLDN23;RAC2;RAC1;VAV3;ITGA4;PRKCB;ACTN1;MMP2;CYBB;RHOH;CYBA;PRKCA;ACTN4;MMP9;RHOA;VAV1;VAV2;CLDN10;CLDN4;CLDN3;PIK3CA;CLDN9;CLDN8;MYL2;CLDN7;PECAM1;EZR;MYL9;VCL;RAPGEF4;ROCK1;ROCK2;TXK;PXN;GNAI3;PIK3R3;CXCR4;THY1;MYL12A;GNAI1;MYL12B;GNAI2;RAP1B;RAP1A;PLCG2;CTNNA1;CTNN…
Graft-versus-host disease	29/42	0.958127	0.999998	0	0	0.589201	0.0252032	CD86;CD80;PRF1;FASLG;TNF;HLA-DMA;HLA-DMB;KLRC1;HLA-DOA;HLA-DOB;HLA-DQA2;HLA-DQA1;HLA-DPA1;HLA-DRB5;HLA-B;GZMB;HLA-A;HLA-F;HLA-E;IL6;IFNG;IL1B;CD28;HLA-DPB1;FAS;HLA-DRA;KLRD1;HLA-DRB1;HLA-DQB1
Steroid biosynthesis	13/20	0.95906	0.999998	0	0	0.490726	0.0205133	CYP51A1;MSMO1;CEL;LIPA;TM7SF2;CYP27B1;SQLE;EBP;SOAT1;CYP2R1;SC5D;DHCR7;LBR
Inositol phosphate metabolism	52/73	0.959655	0.999998	0	0	0.653721	0.0269212	PI4K2B;INPPL1;PTEN;PIK3CD;PIK3C2G;PIK3CB;PIK3C2A;PIK3CG;PIK3C2B;IMPA1;PLCZ1;IMPA2;PIP4K2A;PLCE1;PIP4K2B;PIP4K2C;MIOX;SACM1L;IPMK;ITPK1;OCRL;INPP4A;ITPKB;MINPP1;PLCB3;PLCB4;PIK3CA;ITPKA;PIK3C3;PLCB2;MTMR4;MTMR6;MTM1;MTMR7;INPP5B;INPP5F;INPP5D;INPP5J;PLCG2;PIP5K1B;PLCG1;SYNJ2;FIG4;ALDH6A1;PIKFYVE;SYNJ1;PI4KA;PI4KB;PLCH2;PLCD3;PLCD4;PLCD1
Pentose and glucuronate interconversions	23/34	0.962388	0.999998	0	0	0.552316	0.0211746	UGT2B10;UGT1A10;KL;RPEL1;UGT1A1;DCXR;DHDH;SORD;AKR1B1;UGT2B28;UGDH;UGP2;AKR1B10;UGT1A5;UGT1A4;UGT2A3;CRYL1;UGT1A3;UGT1A8;UGT1A7;XYLB;UGT2B7;UGT1A6
Glycosphingolipid biosynthesis	31/45	0.964055	0.999998	0	0	0.584781	0.0214073	B4GALT2;B4GALT3;HEXB;FUT2;FUT1;FUT4;FUT3;FUT6;FUT5;FUT7;FUT9;B3GALT2;GCNT2;ST3GAL5;B4GALNT1;ST3GAL6;ST3GAL1;ST3GAL2;ST3GAL3;B3GALNT1;ST8SIA1;SLC33A1;B3GALT4;B3GALT5;GBGT1;B3GNT5;B3GNT2;ST6GALNAC3;ST6GALNAC4;B4GALT4;ST6GALNAC6
Mannose type O-glycan biosynthesis	15/23	0.964355	0.999998	0	0	0.495388	0.0179805	B4GALT2;POMT2;B4GALT3;B3GAT2;POMT1;POMGNT2;POMGNT1;FUT4;B4GAT1;FUT9;MGAT5B;CHST10;POMK;LARGE2;ST3GAL3
Renin-angiotensin system	15/23	0.964355	0.999998	0	0	0.495388	0.0179805	CPA3;CTSA;ENPEP;ACE;KLK1;MME;ATP6AP2;PREP;LNPEP;ACE2;NLN;ANPEP;AGTR1;CTSG;REN
Homologous recombination	28/41	0.965676	0.999998	0	0	0.568848	0.0198679	MUS81;BLM;MRE11;BRCA1;BRCC3;BRCA2;POLD3;EME1;POLD1;POLD2;UIMC1;RBBP8;RAD54L;NBN;TOPBP1;BARD1;XRCC2;TOP3A;RPA1;RPA2;RAD52;RAD50;RAD51D;RAD51;RAD51C;RPA4;ATM;SYCP3
Toll-like receptor signaling pathway	75/104	0.965969	0.999998	0	0	0.682448	0.023629	CD86;CD40;CXCL8;CCL4L2;CD80;PIK3CD;PIK3CB;TNF;IKBKB;TBK1;CASP8;AKT2;CTSK;MAP3K8;LBP;RAC1;MAP3K7;IKBKE;IFNAR2;MAP2K3;MAP2K4;MAP2K2;TICAM2;CHUK;FOS;IRAK4;TICAM1;TIRAP;TLR1;IRF3;PIK3CA;TRAF3;IL1B;IRF7;TLR9;TLR8;IRF5;TLR7;TLR6;TLR5;TLR4;TLR3;IFNAR1;TLR2;CCL3L3;LY96;PIK3R3;MAPK9;MAPK8;IRAK1;CCL5;CCL4;CCL3;SPP1;MAPK1;CD14;FADD;MAP2K7;MAP2K6;MAPK3;JUN;STAT1;MAPK14;NFKB1;MAPK12;MAPK13;NFKBIA;MAPK10;CXCL1…
Long-term depression	42/60	0.966339	0.999998	0	0	0.616059	0.021094	RYR1;GRIA2;PPP1R17;GUCY1B1;ARAF;GNAI3;ITPR1;ITPR2;ITPR3;GRM1;CRHR1;GNAI1;IGF1R;GNAI2;GNA13;PPP2CA;PPP2CB;NRAS;PPP2R1B;GNA11;MAPK1;NOS1;HRAS;GRIA3;MAPK3;LYN;GUCY1A2;GUCY1A1;PLA2G4F;MAP2K2;PRKCB;PLA2G4C;PLA2G4A;PRKCA;BRAF;GNAO1;PLCB3;PLCB4;GNAQ;KRAS;RAF1;PLCB2
Axon guidance	134/182	0.969287	0.999998	0	0	0.736054	0.0229608	EPHB6;SEMA5B;CFL2;CFL1;PLXNC1;EPHB2;EPHB1;EPHB3;SEMA6B;SEMA6C;SEMA6A;UNC5A;WNT5B;UNC5B;SEMA6D;WNT5A;PRKCA;UNC5C;SMO;EPHA1;RAF1;MYL9;EPHA3;NGEF;EPHA2;SEMA7A;PIK3R3;EFNA4;PRKCZ;MYL12A;MYL12B;EFNB2;PPP3R1;EFNB3;RRAS;PLCG2;PLXNA2;PLXNA1;PLCG1;LRRC4C;SRGAP2;PLXNA4;PLXNA3;WNT4;NTNG1;NTNG2;PTCH1;NFATC3;NFATC2;SSH2;BMP7;NFATC4;SSH1;EFNA3;CXCL12;FES;ITGB1;GSK3B;NRP1;ROBO3;BMPR2;PIK3CD;PIK3CB;RND1;ROBO1;PP…
SNARE interactions in vesicular transport	22/33	0.970138	0.999998	0	0	0.528268	0.0160155	STX17;STX16;GOSR2;STX19;GOSR1;SNAP23;STX11;BET1L;STX1B;VAMP7;STX6;VTI1A;VAMP1;STX4;STX3;STX2;VAMP4;YKT6;VAMP5;STX1A;VAMP2;VTI1B
Glycolysis / Gluconeogenesis	47/67	0.970429	0.999998	0	0	0.620358	0.0186215	GPI;ACSS2;ADH1C;ADPGK;ADH1B;ADH1A;ENO2;ENO4;HK2;ADH5;HK1;ADH6;LDHC;HK3;ADH4;LDHB;LDHA;ALDH2;ALDH1B1;ALDH3B1;PGK1;PGM2;DLAT;PGK2;ACSS1;PCK1;PGM1;PCK2;PDHA1;PKLR;G6PC1;GCK;ALDH3A2;MINPP1;PFKL;HKDC1;GAPDHS;GALM;ALDOB;ALDH7A1;DLD;FBP1;PFKM;LDHAL6A;PFKP;ALDH9A1;LDHAL6B
Vasopressin-regulated water reabsorption	30/44	0.970494	0.999998	0	0	0.565882	0.016948	DCTN5;DYNC1I2;RAB5B;RAB5C;DCTN2;DCTN4;ADCY3;AQP3;DYNC2LI1;CREB3L3;CREB3L4;ARHGDIB;STX4;PRKACA;PRKACB;DYNC2H1;DYNC1H1;DYNLL1;DYNLL2;RAB11A;RAB11B;CREB3;DYNC1LI1;DYNC1LI2;ADCY9;CREB1;AVP;RAB5A;VAMP2;CREB5
VEGF signaling pathway	41/59	0.971587	0.999998	0	0	0.601353	0.0173337	SHC2;SH2D2A;PXN;PIK3CD;PIK3R3;PIK3CB;PTGS2;CASP9;PPP3CA;PPP3CB;NRAS;PPP3R1;PPP3CC;AKT2;KDR;RAC2;PLCG2;RAC3;MAPK1;RAC1;PLCG1;HRAS;MAPK3;PLA2G4F;MAP2K2;PRKCB;SPHK2;BAD;SPHK1;PLA2G4C;PLA2G4A;NFATC2;PRKCA;MAPK14;MAPK12;MAPK13;VEGFA;MAPK11;PIK3CA;KRAS;RAF1
Terpenoid backbone biosynthesis	14/22	0.973507	0.999998	0	0	0.462333	0.0124136	IDI1;NUS1;ICMT;HMGCS1;HMGCR;ACAT1;DHDDS;ZMPSTE24;FNTB;PDSS2;MVD;PDSS1;RCE1;PCYOX1
Peroxisome	58/82	0.973582	0.999998	0	0	0.637789	0.0170759	ABCD4;PECR;ABCD2;ABCD3;ECI2;MPV17L;MPV17L2;PEX26;SCP2;NUDT19;MLYCD;MPV17;ACAA1;NUDT12;ACOT8;PHYH;ACSL1;ECH1;ACSL6;ACSL5;PIPOX;ACSL4;ACSL3;PEX1;ACOX2;ACOX1;PEX3;EHHADH;CAT;PEX5;FAR1;ACOX3;FAR2;AGXT;PEX11G;SLC27A2;PAOX;HSD17B4;DDO;HMGCL;HACL1;HAO1;DECR2;HAO2;PEX19;EPHX2;IDH1;IDH2;PEX10;PEX12;SOD2;PEX13;PEX14;DHRS4;NUDT7;DAO;PXMP2;CRAT
Pathogenic Escherichia coli infection	145/197	0.974166	0.999998	0	0	0.735014	0.0192378	CYFIP2;NCKAP1;WIPF1;WIPF2;WIPF3;ARPC5L;CLDN2;CLDN1;TNF;ACTB;ACTG1;PYCARD;TUBB6;TUBB3;TUBB1;TNFSF10;MAP3K7;IL1R1;CLDN4;CLDN3;CLDN9;CLDN8;NCL;CLDN7;EZR;NAIP;LPAR1;LPAR2;LPAR4;IRAK1;MYO6;MYH14;NLRP3;NCKAP1L;FADD;JUN;MYO5A;TNFRSF10B;ARPC4;TNFRSF10A;ARPC5;NFKB1;NFKBIA;IL6;LPAR5;ARPC2;ARPC3;MYO5B;CYCS;TAB3;TAB2;MYD88;NFKBIB;TUBA8;ITGB1;CXCL8;ARPC1B;FASLG;WASL;CLDN22;IKBKB;CASP9;TUBA1B;CASP7;TUBA1A;CASP…
Tyrosine metabolism	24/36	0.974237	0.999998	0	0	0.528209	0.0137868	DDC;AOC2;FAHD1;ADH1C;MAOB;GOT1;HGD;ADH1B;MAOA;ADH1A;TYRP1;GOT2;DBH;COMT;FAH;ADH5;ADH6;ADH4;IL4I1;TPO;LRTOMT;ALDH3B1;AOX1;HPD
Carbohydrate digestion and absorption	32/47	0.974601	0.999998	0	0	0.563303	0.014492	AMY2A;AMY2B;ATP1A4;ATP1A3;PIK3CD;PIK3R3;SLC2A2;CACNA1D;ATP1A1;PIK3CB;SLC2A5;HK2;HK1;HK3;AKT2;SLC37A4;MGAM;AMY1A;PRKCB;AMY1B;AMY1C;ATP1B3;ATP1B2;ATP1B1;G6PC1;MGAM2;PLCB3;PLCB4;PIK3CA;HKDC1;LCT;PLCB2
Circadian entrainment	69/97	0.976801	0.999998	0	0	0.650185	0.0152614	RYR1;RYR2;GUCY1B1;CALML3;RPS6KA5;GNGT2;NOS1;PRKACA;PRKACB;GUCY1A2;GUCY1A1;PRKCB;PRKCA;FOS;MTNR1A;PLCB3;ADCY9;CREB1;PLCB4;NOS1AP;PLCB2;CAMK2B;GRIA2;ADCYAP1R1;CAMK2D;CAMK2A;ITPR1;GNAI3;ADCY3;CACNA1D;ITPR3;ADCY2;CACNA1C;ADCY8;ADCY7;CACNA1H;GNAI1;CACNA1G;GNAI2;CACNA1I;GNG10;GRIN2A;GNG3;GNG2;RASD1;GNG4;GNG7;MAPK1;CAMK2G;GRIA3;KCNJ3;MAPK3;KCNJ5;GNG12;GNG11;GRIN2B;GRIN2D;GRIN1;GNAO1;ADCY10;PER1;PER3;GNA…
Complement and coagulation cascades	60/85	0.977039	0.999998	0	0	0.633319	0.0147109	ITGAM;PROS1;ITGB2;SERPINE1;F13A1;PLAT;CLU;SERPINA5;THBD;C8G;C3AR1;ITGAX;BDKRB1;VSIG4;CR2;CR1;VWF;FGG;SERPINF2;PLAUR;F2;F3;F5;F7;PROCR;F8;SERPING1;MASP2;CD46;CFB;C1QB;CFD;C1QA;C1S;CFH;C1R;SERPINC1;C5AR1;CFI;PLG;TFPI;KNG1;C2;C3;VTN;C5;C6;C7;A2M;CD55;F11;PROC;CFHR1;CR1L;CFHR4;CFHR3;KLKB1;F2RL2;C1QC;F2RL3
Thiamine metabolism	2015-09-01	0.977139	0.999998	0	0	0.39635	0.00916623	THTPA;NFS1;TPK1;AK1;AK2;ALPL;AK4;AK5;AK8
Shigellosis	182/246	0.978092	0.999998	0	0	0.749179	0.0165952	UBE2D4;UBE2D2;UBE2D3;ARPC5L;UBE2D1;FNBP1L;TNF;ACTB;CRKL;ACTG1;PYCARD;RPS6KA5;TBK1;AKT2;PLCE1;CAPN1;BTRC;MAP3K7;SKP1;GABARAPL1;FNBP1;IL1R1;ACTN1;PRKCE;PRKCD;ACTN4;ATG14;ATG12;RBX1;RRAGC;RRAGB;MYL2;RRAGD;ELMO1;UBE2V2;PFN4;VDAC1;TLN2;UBE2V1;PFN1;MYL9;TP53;UBA52;SQSTM1;NAIP;PFN3;PPID;VCL;PFN2;PXN;PIK3R4;ITPR1;PIK3R3;ITPR2;ITPR3;BCL10;FOXO4;FOXO3;MYL12A;FOXO1;MYL12B;C3;UBC;H3C1;PLCG2;NLRP3;H3C3;CD14;H…
Adipocytokine signaling pathway	48/69	0.978278	0.999998	0	0	0.603281	0.0132489	PRKAA1;PRKAA2;PRKAG2;IRS2;SLC2A4;TNF;ACACB;PRKAG3;CAMKK2;IKBKB;MAPK9;SOCS3;MAPK8;RXRA;AKT2;NPY;LEPR;CD36;JAK2;PCK1;PPARGC1A;RXRG;PCK2;CPT1A;PRKAB2;CHUK;ACSL1;ADIPOQ;STAT3;ACSL6;ACSL5;ACSL4;TRAF2;ACSL3;CPT1C;TNFRSF1B;G6PC1;MTOR;NFKB1;MAPK10;NFKBIA;POMC;LEP;ACSBG1;PPARA;NFKBIE;ACSBG2;NFKBIB
Tight junction	123/169	0.980515	0.999998	0	0	0.704854	0.0138695	PATJ;ARPC5L;PPP2R2A;CLDN2;CLDN1;ACTB;ACTG1;AMOT;CCND1;PPP2R1B;PRKACA;SYNPO;PRKACB;MAGI1;PRKAB2;ACTN1;PRKCE;ACTN4;RUNX1;TIAM1;CLDN4;MYL6;CLDN3;CLDN9;CLDN8;MYL2;CLDN7;EZR;MYL9;CFTR;LLGL1;LLGL2;IGSF5;NEDD4L;ARHGAP17;CACNA1D;CD1E;CD1D;CD1C;CD1B;PRKCZ;CD1A;MYL12A;MYL12B;RAP1A;MYH14;MAP2K7;MPDZ;VASP;JUN;HSPA4;RDX;ARPC4;ARPC5;CGN;AFDN;DLG1;DLG2;ARPC2;DLG3;ARPC3;CDK4;AMOTL1;NF2;PALS1;TUBA8;ITGB1;ARPC1B;P…
Lipid and atherosclerosis	158/215	0.980526	0.999998	0	0	0.730378	0.0143639	ERO1A;NCF1;NCF2;NCF4;CALML3;TNF;ICAM1;PYCARD;TBK1;AKT2;TNFSF10;MAP3K7;MAP2K3;MAP2K4;TICAM2;CYBB;PRKCA;CYBA;TICAM1;ERN1;DDIT3;ATF6;TP53;ABCG1;ATF4;CCL3L3;ITPR1;PIK3R3;LY96;AGER;RAP1B;PPP3R1;CYP2B6;RAP1A;IRAK1;NLRP3;CD14;PLCG1;APOB;MAP2K7;MAP2K6;ABCA1;LYN;CYP2J2;JUN;XBP1;VCAM1;HSPA4;HSPA6;EIF2AK3;NFATC3;NFATC2;TNFRSF10B;NFATC1;TNFRSF10A;HSPA2;POU2F2;POU2F3;SELE;NFKB1;NFKBIA;SELP;CYP2C8;IL6;CYCS;TAB…
Gastric acid secretion	53/76	0.980805	0.999998	0	0	0.6081	0.0117862	MYLK2;CALML3;SLC4A2;ACTB;MYLK3;ACTG1;MYLK4;CA2;PRKACA;PRKACB;KCNK10;PRKCB;ATP1B3;PRKCA;ATP1B2;ATP1B1;SSTR2;PLCB3;SLC9A4;ADCY9;PLCB4;KCNQ1;EZR;PLCB2;CFTR;CAMK2B;CAMK2D;CAMK2A;ATP1A4;GNAI3;ITPR1;ADCY3;ATP1A3;ITPR2;ADCY2;ITPR3;ATP1A1;ADCY8;ADCY7;GNAI1;GNAI2;HRH2;CAMK2G;KCNJ1;KCNJ10;KCNJ15;KCNJ16;ATP4B;SST;GNAQ;SLC26A7;CALM1;CALM2
Sphingolipid metabolism	33/49	0.982162	0.999998	0	0	0.544503	0.00980067	ASAH1;GAL3ST1;ASAH2;CERK;SGMS1;SGMS2;GBA2;SMPD3;SMPD2;NEU3;UGCG;NEU4;SGPL1;SPTLC1;SPTLC2;SMPD1;PSAP;KDSR;ENPP7;CERS3;CERS4;CERS5;CERS6;SPHK2;SPHK1;SGPP1;GALC;ACER1;DEGS2;B4GALT6;PLPP3;PLPP2;CERS2
Vitamin digestion and absorption	15/24	0.982857	0.999998	0	0	0.44024	0.00761234	CUBN;SCARB1;ABCC1;SLC46A1;SLC23A1;PLB1;SLC5A6;LMBRD1;FOLH1;RBP2;TCN2;AWAT2;LRAT;APOB;SLC19A2
Pyrimidine metabolism	38/56	0.983688	0.999998	0	0	0.557246	0.00916465	DTYMK;DPYS;NT5C2;TYMS;AK9;TYMP;NME1-NME2;NT5C;PNP;NT5M;ENPP3;TK1;ENTPD1;ENTPD3;ENTPD4;ENTPD5;CAD;NME2;CTPS2;ENTPD8;NME4;DCK;UPB1;NME1;DHODH;UCKL1;DCTD;NT5C3A;UCK2;UCK1;NME6;RRM2B;NME7;DPYD;NT5C1B;CMPK1;UMPS;DCTPP1
Glutamatergic synapse	81/114	0.984528	0.999998	0	0	0.647329	0.0100938	GRIK4;GRIK1;GRIK2;GRM1;GLS;PPP3CA;GRM5;PPP3CB;GNGT2;PPP3CC;GRM6;GRM8;HOMER3;DLGAP1;PRKACA;GLUL;PRKACB;SLC38A1;PLA2G4F;PRKCB;TRPC1;PLA2G4C;PLA2G4A;PRKCA;PLCB3;ADCY9;PLCB4;PLCB2;SHANK3;SHANK2;SHANK1;GRIA2;GLS2;SLC1A1;ITPR1;SLC1A2;GNAI3;ITPR2;SLC1A3;ADCY3;CACNA1D;ITPR3;ADCY2;CACNA1C;PLD1;ADCY8;SLC1A7;ADCY7;GNAI1;PLD2;GNAI2;GNG10;GRIN2A;GRK3;PPP3R1;GNG3;GRK2;GNG2;GNG4;GNG7;MAPK1;SLC17A7;SLC17A8;SLC38…
Wnt signaling pathway	120/166	0.985887	0.999998	0	0	0.687531	0.00977194	CTNND2;FZD10;CCND3;FRAT1;CCND2;FRAT2;CCND1;MYC;CCN4;BTRC;PRKACA;MAP3K7;PRKACB;CER1;SKP1;TLE4;RNF43;TLE2;TLE1;CSNK2A1;WNT5B;PRKCB;CSNK2A3;SERPINF1;CSNK2A2;CTNNBIP1;TPTEP2-CSNK1E;WNT5A;PRKCA;CSNK1E;DKK2;TLE6;RBX1;DKK4;SFRP4;SFRP1;SFRP2;TBL1XR1;SFRP5;ROR2;TP53;CTBP2;TCF7;PSEN1;NLK;PORCN;PPP3R1;DVL1;WNT1;WNT2;WNT3;WNT4;WNT10B;JUN;SMAD4;WNT10A;FZD2;SMAD3;FZD5;FZD4;WNT3A;FZD7;NFATC3;NFATC2;NFATC1;NFATC…
Prolactin signaling pathway	48/70	0.98671	0.999998	0	0	0.575721	0.0077026	GSK3B;SHC2;GALT;SHC1;PIK3CD;SLC2A2;PIK3R3;PIK3CB;TNFRSF11A;FOXO3;CYP17A1;MAPK9;SOCS3;MAPK8;NRAS;CCND2;SOCS1;CCND1;AKT2;TNFSF11;MAPK1;JAK2;HRAS;SOCS7;MAPK3;SOCS5;STAT5A;STAT5B;MAP2K2;CISH;STAT1;STAT3;FOS;MAPK14;PRLR;ESR2;GCK;MAPK12;NFKB1;MAPK13;MAPK10;MAPK11;PIK3CA;IRF1;KRAS;RAF1;SOS1;SOS2
GnRH signaling pathway	65/93	0.98702	0.999998	0	0	0.612337	0.00800011	CALML3;PRKACA;HRAS;PRKACB;MAP2K3;MAP2K4;PLA2G4F;MAP2K2;PRKCB;MMP2;PLA2G4C;PRKCD;PLA2G4A;PRKCA;MMP14;PLCB3;ADCY9;PLCB4;RAF1;SOS1;PLCB2;SOS2;ATF4;HBEGF;CAMK2B;CAMK2D;CAMK2A;ITPR1;ADCY3;ITPR2;ADCY2;CACNA1D;ITPR3;CACNA1C;ADCY8;CACNA1F;PLD1;ADCY7;PLD2;MAPK9;MAPK8;NRAS;MAPK7;GNA11;MAPK1;MAP2K7;CAMK2G;MAP2K6;MAPK3;MAP3K2;EGR1;MAP3K3;JUN;MAP3K1;MAPK14;MAPK12;MAPK13;MAPK10;MAPK11;GNAQ;GNRH2;GNRH1;KRAS;CAL…
Platelet activation	88/124	0.988148	0.999998	0	0	0.644485	0.00768414	ITGB1;MYLK2;GUCY1B1;ITGB3;SNAP23;PIK3CD;PIK3CB;ACTB;ARHGAP35;MYLK3;PIK3CG;ACTG1;MYLK4;PPP1CB;AKT2;PRKACA;PRKACB;GUCY1A2;GUCY1A1;PLA2G4F;PTGIR;ARHGEF12;FCER1G;PPP1R12A;SYK;VWF;FGG;PLA2G4C;PLA2G4A;GP1BA;F2;RHOA;APBB1IP;PLCB3;ADCY9;PLCB4;STIM1;PIK3CA;BTK;ORAI1;ARHGEF1;LCP2;TLN2;PLCB2;ROCK1;ROCK2;ITPR1;GNAI3;ITPR2;PIK3R3;ADCY3;ITPR3;ADCY2;RASGRP2;ADCY8;PRKCZ;ADCY7;MYL12A;PIK3R6;GNAI1;MYL12B;PIK3R5;GN…
Small cell lung cancer	64/92	0.988899	0.999998	0	0	0.602878	0.00673007	ITGB1;RB1;CDKN1A;CDKN1B;LAMC3;PTEN;PIK3CD;LAMC2;LAMC1;PIK3CB;CKS1B;CASP9;IKBKB;CCND1;AKT2;CASP3;MYC;ITGAV;POLK;SKP2;APAF1;CHUK;TRAF2;TRAF1;DDB2;COL4A2;PIK3CA;COL4A1;TRAF3;COL4A4;COL4A3;TRAF5;CKS2;ITGA6;BIRC7;TP53;BIRC2;BIRC3;LAMA2;LAMA4;LAMA3;PIK3R3;XIAP;PTGS2;FHIT;RXRA;E2F1;E2F2;BAK1;RXRG;CDKN2B;GADD45B;GADD45A;LAMB2;FN1;NFKB1;GADD45G;NFKBIA;CDK6;CDK4;CDK2;BAX;CYCS;BCL2L1
Amphetamine addiction	47/69	0.988935	0.999998	0	0	0.563691	0.00627206	CAMK2B;GRIA2;CAMK2D;DDC;HDAC2;MAOB;HDAC1;MAOA;CAMK2A;CALML3;CACNA1D;CACNA1C;SLC6A3;PPP1CB;PPP3CA;PPP3CB;GRIN2A;PPP3R1;PPP3CC;CREB3L3;CREB3L4;PRKACA;PRKACB;CAMK2G;SLC18A2;GRIA3;JUN;PRKCB;PRKCA;FOS;SIRT1;GRIN2B;GRIN1;GRIN2D;PPP1CA;CREB3;ARC;GRIN3B;CREB1;CAMK4;PPP1R1B;FOSB;CALM1;CALM2;STX1A;ATF4;CREB5
Human immunodeficiency virus 1 infection	154/212	0.990303	0.999998	0	0	0.699265	0.00681381	CALML3;TNF;CRKL;TBK1;AKT2;CFL2;CHEK1;CFL1;AP1S2;AP1S3;BTRC;B2M;MAP3K7;SKP1;MAP2K3;MAP2K2;PRKCB;HLA-B;TAP2;TAP1;PRKCA;HLA-A;HLA-F;CDC25C;HLA-E;RBX1;RAF1;CUL5;PXN;ITPR1;PIK3R3;ITPR2;ITPR3;CCNB2;GNG10;PPP3R1;CCNB1;IRAK1;PLCG2;FADD;PLCG1;MAP2K7;AP1M1;MAP2K6;APOBEC3C;APOBEC3D;JUN;APOBEC3F;APOBEC3G;APOBEC3H;NFATC3;NFATC2;NFATC1;GNG12;GNG11;NFKB1;NFATC4;BST2;GNAO1;NFKBIA;GNAQ;GNB2;CDK1;GNB4;CYCS;GNB3;AT…
Melanogenesis	70/101	0.992698	0.999998	0	0	0.595382	0.00436367	GSK3B;WNT2B;CALML3;FZD10;EDNRB;CREB3L3;CREB3L4;PRKACA;PRKACB;HRAS;EDN1;MAP2K2;WNT5B;PRKCB;WNT5A;WNT9B;PRKCA;WNT16;CREB3;PLCB3;ADCY9;CREB1;PLCB4;KIT;RAF1;PLCB2;CAMK2B;CAMK2D;TCF7;ASIP;CAMK2A;LEF1;TYRP1;GNAI3;ADCY3;WNT8B;ADCY2;ADCY8;ADCY7;GNAI1;GNAI2;NRAS;WNT11;DVL1;MAPK1;WNT1;WNT2;CAMK2G;WNT3;WNT4;MAPK3;WNT10B;TCF7L2;WNT10A;TCF7L1;FZD2;FZD5;FZD4;WNT3A;FZD7;WNT7B;WNT7A;GNAO1;POMC;KITLG;MC1R;GNAQ;KR…
Antigen processing and presentation	53/78	0.992791	0.999998	0	0	0.559183	0.00404552	CIITA;IFI30;TNF;CTSS;CTSL;HLA-DOA;B2M;HLA-DOB;CTSB;HLA-DPA1;HSP90AA1;CD8B2;HLA-B;TAP2;TAP1;HLA-A;HLA-F;HLA-E;TAPBP;CREB1;CD8B;IFNG;CD8A;CANX;RFX5;PSME1;PSME2;HLA-DQB1;HLA-DMA;HLA-DMB;KLRC1;HLA-DQA2;HLA-DQA1;CD74;HLA-DRB5;KLRC2;NFYA;HSPA4;KLRC3;KLRC4;NFYC;HSPA6;RFXANK;HSPA2;CD4;RFXAP;HLA-DPB1;HLA-DRA;KLRD1;HLA-DRB1;HSPA1B;HSPA1A;LGMN
Cellular senescence	111/156	0.993017	0.999998	0	0	0.649883	0.00455408	RB1;MRE11;TRAF3IP2;SERPINE1;CALML3;ETS1;PPP1CB;CCND3;CCND2;CCND1;AKT2;CHEK2;MYC;RASSF5;CHEK1;CAPN1;NBN;BTRC;MAP2K3;MAP2K2;HLA-B;HUS1;TSC1;HLA-A;HLA-F;HLA-E;VDAC2;VDAC1;RAF1;SQSTM1;TP53;PPID;ITPR1;ITPR2;PIK3R3;CACNA1D;ITPR3;FOXO3;FOXO1;ZFP36L2;ZFP36L1;CCNB2;CCNB1;PPP3R1;RRAS;TRPM7;MAP2K6;TGFB2;SMAD3;TGFB1;GADD45B;GADD45A;TGFB3;NFATC3;NFATC2;NFATC1;NFKB1;GADD45G;NFATC4;IL6;CDK6;CDK4;TRPV4;CDK2;CDK1…
Influenza A	123/172	0.993135	0.999998	0	0	0.66122	0.00455478	PRSS1;TPSB2;TNF;ACTB;ACTG1;ICAM1;PABPN1L;PYCARD;CCND3;TBK1;AKT2;KPNA6;TNFSF10;KPNA7;TRIM25;KPNA5;HLA-DOA;KPNA2;HLA-DOB;PRSS2;KPNA1;IFNAR2;MAP2K2;PRKCB;PRKCA;TICAM1;VDAC1;RAF1;IFNAR1;PIK3R3;SOCS3;NLRP3;FADD;HLA-DQA2;HLA-DQA1;CPSF4;HLA-DRB5;TNFRSF10B;TNFRSF10A;NFKB1;NFKBIA;CXCL10;IL6;MAVS;CDK6;CDK4;NXF2B;CYCS;HLA-DRA;HLA-DRB1;MYD88;NFKBIB;CIITA;CXCL8;NXT1;CALCOCO2;PIK3CD;FASLG;PIK3CB;NXT2;CASP9;IFI…
Measles	98/139	0.993899	0.999998	0	0	0.629836	0.00385456	CBLB;CCND3;CCND2;TBK1;CCND1;AKT2;MAP3K7;IFNAR2;CSNK2A1;CSNK2A3;CSNK2A2;TP53;IFNAR1;PIK3R3;IRAK1;FADD;SLAMF1;STAT5A;STAT5B;JUN;EIF2AK1;HSPA6;EIF2AK3;EIF2AK4;HSPA2;NFKB1;NFKBIA;IL6;MAVS;CDK6;CD209;CDK4;CDK2;CD28;CYCS;TAB2;MYD88;BCL2L1;NFKBIB;TP73;GSK3B;CDKN1B;PIK3CD;TNFAIP3;CD3G;FASLG;PIK3CB;CD3E;CD3D;BBC3;CASP9;IFIH1;IKBKB;CASP8;CASP3;RACK1;IKBKE;JAK3;JAK1;APAF1;CHUK;FOS;IRAK4;IRF3;PIK3CA;OAS2;TRA…
Dilated cardiomyopathy	66/96	0.993955	0.999998	0	0	0.580065	0.00351739	ITGB1;RYR2;ITGB4;ITGB3;ATP2A3;ATP2A2;ATP2A1;TNF;ACTB;SLC8A1;ACTG1;SGCD;SGCB;DAG1;ITGB8;ITGAV;ITGB7;ITGB6;PRKACA;PRKACB;SGCG;ITGA4;TPM4;TPM3;CACNA2D1;TNNC1;TPM2;TPM1;CACNA2D3;CACNA2D2;CACNA2D4;CACNB1;CACNB2;CACNB3;ADCY9;CACNB4;MYL2;TNNT2;ITGA8;ITGA6;ITGA5;ITGA9;MYH7;LAMA2;ADCY3;ADCY2;ADRB1;CACNA1D;CACNA1C;ADCY8;CACNA1F;ADCY7;TTN;CACNG8;PLN;LMNA;DMD;CACNG4;CACNG5;TGFB2;TGFB1;TGFB3;SLC8A3;DES;ITGA10…
Hepatitis B	115/162	0.994606	0.999998	0	0	0.644504	0.00348584	RB1;ARAF;TNF;TBK1;CREB3L3;CREB3L4;AKT2;MYC;MAP3K7;MAP2K3;MAP2K4;MAP2K2;TICAM2;PRKCB;PRKCA;TICAM1;RAF1;TP53;ATF4;IFNAR1;PIK3R3;IRAK1;FADD;MAP2K7;MAP2K6;STAT5A;STAT5B;EGR2;JUN;SMAD4;TGFB2;EGR3;SMAD3;TGFB1;SLC10A1;TGFB3;NFATC3;NFATC2;BRAF;NFATC1;NFKB1;NFATC4;NFKBIA;IL6;MAVS;CDK2;CYCS;TAB2;MYD88;CDKN1A;CXCL8;DDX3X;YWHAB;PIK3CD;FASLG;PIK3CB;CASP9;IFIH1;IKBKB;CASP8;YWHAQ;CASP10;CASP3;JAK2;HRAS;IKBKE;JA…
Oxytocin signaling pathway	109/154	0.994607	0.999998	0	0	0.638092	0.00345082	MYLK2;OXTR;GUCY1B1;CALML3;ACTB;MYLK3;ACTG1;MYLK4;PPP1CB;RGS2;CCND1;PRKACA;PRKACB;GUCY1A2;GUCY1A1;MEF2C;PRKAB2;MAP2K2;PRKCB;CACNA2D1;CACNA2D3;CACNA2D2;PRKCA;CACNA2D4;CACNB1;CACNB2;CACNB3;MYL6;ADCY9;CACNB4;RAF1;MYL9;NPR2;ITPR1;ITPR2;CACNA1D;ITPR3;CACNA1C;CACNA1F;PIK3R6;PIK3R5;TRPM2;PPP3R1;MAP2K5;JUN;NFATC3;NFATC2;NFATC1;NFATC4;GNAO1;RCAN1;GNAQ;CALM1;CALM2;RYR1;RYR2;CDKN1A;PRKAG2;MYL6B;PIK3CG;PRKAG3…
Nucleotide excision repair	30/47	0.995215	0.999998	0	0	0.465685	0.00223366	CCNH;XPA;XPC;POLD3;POLD1;POLD2;POLE;RFC5;RFC4;LIG1;RFC1;RFC2;RPA1;RPA2;RAD23A;RAD23B;DDB2;RBX1;CUL4A;DDB1;POLE4;ERCC3;ERCC4;ERCC1;POLE2;ERCC2;RPA4;ERCC6;MNAT1;CUL4B
Parathyroid hormone synthesis, secretion and action	73/106	0.995298	0.999998	0	0	0.583099	0.00274823	CDKN1A;ARAF;ARRB1;ARRB2;PTH1R;AKAP13;MMP25;MMP24;CREB3L3;CREB3L4;PDE4B;TNFSF11;PDE4A;SOST;PRKACA;PRKACB;MEF2A;SLC34A3;SLC34A2;MEF2C;PRKCB;SLC34A1;PDE4D;PRKCA;FOS;RUNX2;RHOA;CREB3;MMP14;PLCB3;ADCY9;CREB1;MMP13;PLCB4;MMP17;ARHGEF1;RAF1;PLCB2;ATF4;CREB5;HBEGF;GCM2;ITPR1;GNAI3;LRP5;ITPR2;ADCY3;ITPR3;ADCY2;GATA3;PLD1;ADCY8;ADCY7;GNAI1;PTHLH;PLD2;GNAI2;LRP6;GNA13;CYP27B1;RXRA;GNA11;MAPK1;MEF2D;RXRG;MAP…
NOD-like receptor signaling pathway	129/181	0.995303	0.999998	0	0	0.653242	0.0030756	ANTXR2;ANTXR1;TNF;PYCARD;TBK1;NAMPT;MAP3K7;IFNAR2;GBP5;GABARAPL1;PRKCD;CYBB;CYBA;TICAM1;ATG12;VDAC2;VDAC1;CARD16;NAIP;IFNAR1;ITPR1;ITPR2;ITPR3;BRCC3;MEFV;TRPM2;DHX33;NLRP6;NLRP7;NLRP3;TRPM7;FADD;NLRP1;TP53BP1;GSDMD;JUN;NEK7;TRPV2;DEFA3;DEFA1;NFKB1;NFKBIA;IL6;MAVS;ATG16L1;TAB3;TAB2;PYDC5;MCU;MYD88;BCL2L1;NFKBIB;YWHAE;CXCL8;TNFAIP3;CXCL1;CXCL3;CXCL2;GPRC6A;IKBKB;PANX1;PSTPIP1;CASP8;CASP5;CASP4;CASP…
Pentose phosphate pathway	18/30	0.995347	0.999998	0	0	0.396006	0.0018469	PRPS2;GPI;TKTL1;H6PD;RPEL1;GLYCTK;RPIA;PFKL;RGN;PGM2;IDNK;PGLS;ALDOB;FBP1;PFKM;PGM1;PFKP;RBKS
Relaxin signaling pathway	90/129	0.995492	0.999998	0	0	0.608067	0.00274752	RXFP4;PIK3CD;ARRB1;ARRB2;PIK3CB;EDNRB;GNGT2;CREB3L3;CREB3L4;AKT2;NOS1;PRKACA;PRKACB;HRAS;MAP2K4;EDN1;MAP2K2;MMP1;MMP2;PRKCA;FOS;MMP9;TGFBR2;ACTA2;CREB3;PLCB3;ADCY9;CREB1;MMP13;PLCB4;COL4A2;PIK3CA;COL4A1;COL4A4;COL4A3;RAF1;SOS1;PLCB2;SOS2;ATF4;CREB5;SHC2;SHC1;GNAI3;PIK3R3;ADCY3;ADCY2;ADCY8;PRKCZ;ADCY7;GNAI1;GNAI2;MAPK9;GNG10;GNA15;GNG3;MAPK8;NRAS;GNG2;GNG4;GNG7;MAPK1;MAP2K7;MAPK3;JUN;TGFB1;VEGFC;V…
Inflammatory mediator regulation of TRP channels	67/98	0.99557	0.999998	0	0	0.569757	0.00252963	HTR2B;PIK3CD;CALML3;HTR2A;PIK3CB;PPP1CB;BDKRB1;PRKACA;PRKACB;MAP2K3;PLA2G4F;PRKCH;IL1R1;PRKCB;PRKCE;PRKCD;PLA2G4C;PLA2G4A;PRKCA;PLCB3;ADCY9;PLCB4;PIK3CA;IL1B;PLCB2;CAMK2B;PTGER4;CAMK2D;PTGER2;CAMK2A;ITPR1;ITPR2;PIK3R3;ADCY3;ALOX12;ITPR3;ADCY2;PLA2G6;ADCY8;ADCY7;KNG1;MAPK9;ASIC4;HRH1;MAPK8;P2RY2;PLCG2;PLCG1;TRPM8;ASIC3;CAMK2G;MAP2K6;CYP2J2;TRPA1;TRPV2;TRPV3;TRPV1;MAPK14;MAPK12;MAPK13;PPP1CA;MAPK10…
Base excision repair	20/33	0.995759	0.999998	0	0	0.406114	0.00172602	MBD4;FEN1;PARP3;LIG1;MPG;OGG1;XRCC1;LIG3;POLB;POLD3;POLE4;SMUG1;NEIL3;NEIL2;NTHL1;POLD1;POLE2;POLD2;POLL;POLE
AMPK signaling pathway	83/120	0.99626	0.999998	0	0	0.591108	0.00221474	CRTC2;CAB39L;PIK3CD;PRKAG2;IRS2;PPP2R2A;PIK3CB;SLC2A4;ADRA1A;PRKAG3;IGF1R;GYS1;EEF2K;CCND1;CREB3L3;PPP2R1B;CREB3L4;PPP2R5E;AKT2;HNF4A;LEPR;MLYCD;CD36;MAP3K7;RAB8A;RAB2A;CPT1A;PRKAB2;PDPK1;STRADA;STRADB;ADIPOQ;PPP2R5A;TSC1;PPP2R5D;PPP2R5C;CPT1C;SIRT1;CCNA2;CREB3;CREB1;PIK3CA;AKT1S1;ULK1;FBP1;CFTR;CREB5;PFKFB2;PFKFB1;PFKFB4;PRKAA1;PFKFB3;PRKAA2;CAB39;PIK3R3;HMGCR;FOXO3;ACACB;ACACA;FOXO1;CAMKK2;PPP2…
Hippo signaling pathway	115/163	0.996355	0.999998	0	0	0.630924	0.00230402	PATJ;SERPINE1;PPP2R2A;FZD10;FGF1;ACTB;ACTG1;AMOT;PPP1CB;CCND3;RASSF1;CCND2;RASSF2;CCND1;PPP2R1B;CDH1;RASSF4;MYC;RASSF6;CCN2;BTRC;WNT5B;TPTEP2-CSNK1E;WNT5A;CSNK1E;FRMD1;FRMD6;LLGL1;LLGL2;TCF7;PRKCZ;STK3;DVL1;TP53BP2;WNT1;WNT2;WNT3;WNT4;SMAD1;WNT10B;WWTR1;SMAD4;TGFB2;WNT10A;FZD2;SMAD3;TGFB1;FZD5;FZD4;TGFB3;WNT3A;FZD7;BMP7;GDF5;SMAD7;BMP4;MOB1B;MOB1A;DLG1;DLG2;DLG3;DCHS2;ID2;SNAI2;DCHS1;NF2;PALS1;TP…
Primary bile acid biosynthesis	2017-09-01	0.996445	0.999998	0	0	0.29712	0.00105828	CYP27A1;CH25H;ACOT8;ACOX2;SCP2;HSD17B4;CYP46A1;CYP7B1;CYP8B1
Maturity onset diabetes of the young	15/26	0.996541	0.999998	0	0	0.360023	0.00124744	PKLR;HNF4G;SLC2A2;HNF1B;PAX6;BHLHA15;HNF1A;MAFA;GCK;HHEX;NR5A2;HNF4A;HES1;MNX1;FOXA3
Adrenergic signaling in cardiomyocytes	105/150	0.996883	0.999998	0	0	0.61452	0.0019183	CALML3;PPP2R2A;SLC8A1;PPP1CB;RPS6KA5;CREB3L3;PPP2R1B;CREB3L4;AKT2;PRKACA;PRKACB;SCN1B;TPM4;TPM3;CACNA2D1;TPM2;TPM1;CACNA2D3;CACNA2D2;ATP1B3;PRKCA;ATP1B2;CACNA2D4;ATP1B1;CACNB1;CACNB2;CACNB3;ADCY9;CACNB4;KCNQ1;MYL2;AGTR1;ATF4;KCNE1;CREM;ADRB1;CACNA1D;ADRB2;CACNA1C;CACNA1F;PIK3R6;PIK3R5;PPP1R1A;GNAQ;CALM1;CALM2;RYR2;ATP2A3;ATP2A2;ATP2A1;ADRA1B;ADRA1A;PIK3CG;PPP2R5E;SCN5A;TNNC1;PPP2R5A;PPP2R5D;PPP2R…
Bacterial invasion of epithelial cells	51/77	0.997156	0.999998	0	0	0.517196	0.00147325	ITGB1;ARPC1B;CLTC;ARPC5L;PIK3CD;SEPTIN12;PIK3CB;WASL;ACTB;ACTG1;CRKL;CDH1;RAC1;ACTR3;ACTR2;GAB1;RHOG;RHOA;CD2AP;DNM2;ARHGAP10;PIK3CA;ELMO1;HCLS1;ELMO3;ITGA5;MET;VCL;SHC2;ARHGEF26;SHC1;PXN;PIK3R3;CBL;CTNNA1;CTNNA3;WASF1;SEPTIN1;CAV2;SEPTIN2;CAV1;FN1;SEPTIN6;ARPC4;ARPC5;SEPTIN9;SEPTIN8;MAD2L2;ARPC2;ARPC3;BCAR1
Kaposi sarcoma-associated herpesvirus infection	137/193	0.997173	0.999998	0	0	0.643904	0.00182283	RB1;CD86;CALML3;FGF2;ICAM1;PREX1;ZFP36;TBK1;CCND1;AKT2;MYC;IFNAR2;MAP2K4;GABARAPL1;MAP2K2;HLA-B;HLA-A;ATG14;HLA-F;TICAM1;HLA-E;IL6ST;RAF1;TP53;UBA52;IFNAR1;TCF7;ITPR1;PIK3R3;ITPR2;ITPR3;PIK3R6;PIK3R5;C3;GNG10;PPP3R1;UBC;PLCG2;FADD;PLCG1;MAP2K7;MAP2K6;LYN;JUN;NFATC3;NFATC2;NFATC1;GNG12;GNG11;NFKB1;NFATC4;NFKBIA;RCAN1;IL6;CDK6;CDK4;GNB2;GNB4;CYCS;GNB3;GNB5;CALM1;CALM2;GSK3B;CDKN1A;CXCL8;PIK3CD;CXCL…
Ubiquinone and other terpenoid-quinone biosynthesis	2023-11-05	0.997419	0.999998	0	0	0.220139	0.000568836	COQ2;GGCX;HPD;COQ6;COQ5
Hepatocellular carcinoma	118/168	0.997551	0.999998	0	0	0.621306	0.00152374	RB1;SMARCB1;ARAF;FZD10;ACTB;ACTG1;IGF1R;FRAT1;FRAT2;CCND1;AKT2;MYC;DPF3;ARID2;SMARCC1;MAP2K2;WNT5B;PRKCB;HGF;WNT5A;PRKCA;RAF1;TP53;SHC2;SHC1;TERC;TCF7;MGST1;PIK3R3;DVL1;PLCG2;PLCG1;WNT1;WNT2;WNT3;WNT4;GSTM4;GSTM3;WNT10B;GSTM2;SMAD4;TGFB2;WNT10A;FZD2;SMAD3;TGFB1;FZD5;GADD45B;PHF10;FZD4;GADD45A;TGFB3;WNT3A;FZD7;IGF2;BRAF;SMARCA2;GADD45G;CDK6;CDK4;BCL2L1;GSTM5;NFE2L2;GSK3B;CDKN1A;WNT2B;PTEN;PIK3CD;P…
Cell adhesion molecules	103/148	0.99767	0.999998	0	0	0.602738	0.00140624	CD86;CD80;ICAM2;ICAM3;CLDN2;CLDN1;ICAM1;ALCAM;CDH3;CDH2;CDH1;HLA-DOA;HLA-DOB;ICOSLG;HLA-B;HLA-A;HLA-F;HLA-E;CLDN4;MAG;CLDN3;CD8B;CD8A;CLDN9;CLDN8;CLDN7;CD226;CD274;SDC3;GLG1;ICOS;LRRC4C;HLA-DQA2;CD99;HLA-DQA1;CD276;NTNG1;NTNG2;CADM3;HLA-DRB5;VCAM1;SELE;IGSF11;SELP;PTPRC;SELL;CD28;HLA-DRA;SDC1;CD22;HLA-DRB1;ITGB1;CD40;CNTNAP1;ITGAM;ITGB2;PTPRM;ITGAL;VSIR;CLDN22;SPN;CLDN24;CLDN23;CTLA4;ITGB8;ITGAV;…
alpha-Linolenic acid metabolism	14/25	0.997704	0.999998	0	0	0.336001	0.000772284	PLA2G12A;PLA2G2D;PLA2G4F;PLA2G12B;PLA2G2A;PLA2G4C;PLA2G3;PLA2G4A;PLA2G6;PLB1;FADS2;ACOX1;ACOX3;ACAA1
Cholinergic synapse	77/113	0.997786	0.999998	0	0	0.563531	0.00124879	ACHE;CHRM4;CHRM5;PIK3CD;PIK3CB;PIK3CG;GNGT2;CREB3L3;CREB3L4;AKT2;PRKACA;JAK2;PRKACB;HRAS;CHRNB2;CHRNB4;PRKCB;PRKCA;FOS;SLC5A7;CREB3;PLCB3;ADCY9;CREB1;PLCB4;PIK3CA;KCNQ1;KCNQ3;KCNQ5;PLCB2;ATF4;CREB5;CAMK2B;CAMK2D;CHRNA4;CHRNA6;CAMK2A;ITPR1;GNAI3;ITPR2;PIK3R3;ADCY3;CACNA1D;ITPR3;ADCY2;CACNA1C;CACNA1F;ADCY8;ADCY7;PIK3R6;GNAI1;PIK3R5;GNAI2;GNG10;GNG3;NRAS;GNG2;GNG4;GNA11;GNG7;MAPK1;FYN;CAMK2G;KCNJ3;M…
Alcoholism	131/186	0.998084	0.999998	0	0	0.62681	0.00120196	HDAC11;ARAF;H2AC19;CALML3;H2AC15;H2AC16;H2AC17;H2AC18;H2AC11;PPP1CB;H2AC12;H2AC13;H2AC14;CREB3L3;CREB3L4;H4C2;H4C1;H4C4;PRKACA;H4C3;PRKACB;H4C6;H4C5;H2AC8;H2AC7;H2AC4;H4C15;H4C14;H4C13;H4C12;HAT1;H4C11;RAF1;ATF4;SHC2;MAOB;MAOA;SHC1;MACROH2A2;MACROH2A1;GNG10;GRIN2A;H3C1;H3C3;H3C2;H3C4;H3C7;H3C6;H4C8;H4C9;BDNF;BRAF;GNG12;GNG11;GRIN2B;GRIN2D;GNAO1;GRIN3B;GNB2;PKIA;H2AC21;PPP1R1B;GNB4;GNB3;GNB5;CALM1…
Retinol metabolism	44/68	0.998085	0.999998	0	0	0.48341	0.000926771	UGT1A10;RDH8;ADH1C;RETSAT;ADH1B;ADH1A;UGT2B28;HSD17B6;CYP3A4;CYP3A5;ADH5;ADH6;CYP3A7;ADH4;CYP26B1;CYP2B6;RDH12;AWAT2;RDH11;RDH10;UGT1A5;AOX1;UGT2A3;UGT1A4;LRAT;UGT1A3;DHRS4L2;UGT1A8;UGT1A7;UGT1A6;UGT2B10;CYP3A7-CYP3A51P;UGT1A1;DHRS4;ALDH1A3;CYP27C1;CYP2C8;CYP2W1;CYP26C1;DHRS9;CYP2S1;ALDH1A1;RDH5;UGT2B7
Phosphatidylinositol signaling system	65/97	0.998146	0.999998	0	0	0.535279	0.000993454	PI4K2B;DGKD;DGKB;DGKA;INPPL1;PTEN;PIK3CD;CALML3;PIK3C2G;PIK3CB;PIK3C2A;PIK3C2B;PPIP5K1;IMPA1;PLCZ1;PPIP5K2;IMPA2;PIP4K2A;PLCE1;PIP4K2B;PIP4K2C;PRKCB;SACM1L;IPMK;ITPK1;OCRL;PRKCA;INPP4A;ITPKB;PLCB3;PLCB4;PIK3CA;ITPKA;PIK3C3;DGKK;PLCB2;DGKH;CDS1;ITPR1;ITPR2;PIK3R3;ITPR3;MTMR4;MTMR6;MTM1;MTMR7;INPP5B;INPP5F;INPP5D;PLCG2;BPNT2;PIP5K1B;PLCG1;IP6K3;IP6K2;SYNJ2;PIKFYVE;SYNJ1;PI4KA;PI4KB;CALM1;PLCD3;CALM…
Cholesterol metabolism	31/50	0.998356	0.999998	0	0	0.430375	0.000708189	SCARB1;CETP;LRPAP1;LRP1;PCSK9;LRP2;LIPA;APOH;LIPG;TSPO;CD36;APOE;APOB;LDLR;PLTP;ABCA1;MYLIP;ABCG5;APOC3;CYP27A1;NCEH1;NPC1;SOAT1;STAR;VAPA;VAPB;APOC1;ANGPTL3;VDAC2;VDAC1;LPA
Riboflavin metabolism	2023-08-03	0.998422	0.999998	0	0	0.158518	0.000250309	FLAD1;ACP2;ENPP3
PPAR signaling pathway	48/74	0.99853	0.999998	0	0	0.48668	0.000715826	UCP1;AQP7;FADS2;RXRA;ACADL;CPT2;SCP2;UBC;ME1;OLR1;ME3;ACADM;CD36;ACAA1;PCK1;PLTP;RXRG;PCK2;CPT1A;HMGCS1;GK;ACSL1;MMP1;PDPK1;ADIPOQ;SCD5;ACSL6;ACSL5;APOC3;ACSL4;ACSL3;CPT1C;CYP8B1;CYP27A1;FABP1;FABP4;ACOX2;ACOX1;EHHADH;ACSBG1;PLIN2;ACOX3;PLIN1;PPARA;ACSBG2;SLC27A2;PLIN5;PPARD
Apelin signaling pathway	94/137	0.998596	0.999998	0	0	0.575605	0.000808777	RYR1;MYLK2;RYR2;SERPINE1;PRKAG2;CALML3;PLAT;MYLK3;SLC8A1;PIK3CG;PRKAG3;MYLK4;GNGT2;CCND1;CDH1;AKT2;CCN2;NOS1;PRKACA;PRKACB;HRAS;MEF2A;GABARAPL1;MEF2C;PRKAB2;MAP2K2;SPHK2;PRKCE;SPHK1;RPS6;RRAS2;ACTA2;PLCB3;ADCY9;MRAS;PLCB4;MYL2;AGTR1;TFAM;PIK3C3;PLIN1;RAF1;PLCB2;BECN1;PRKAA1;PRKAA2;ITPR1;PIK3R4;GNAI3;UCP1;ITPR2;ADCY3;ITPR3;ADCY2;NRF1;ADCY8;ADCY7;PIK3R6;GNAI1;PIK3R5;GNAI2;GNA13;GNG10;GNG3;NRAS;GNG2…
Human T-cell leukemia virus 1 infection	155/219	0.998682	0.999998	0	0	0.636937	0.000840012	RB1;CRTC2;SPI1;BUB1B;ETS1;TNF;ETS2;ICAM1;CDC20;CCND3;ZFP36;CDC23;CCND2;CREB3L3;KAT5;CCND1;PTTG1;CREB3L4;PTTG2;AKT2;CHEK2;MYC;CDC27;CHEK1;PRKACA;HLA-DOA;B2M;PRKACB;HLA-DOB;IL15RA;MAP2K4;MAP2K2;ANAPC7;MSX2;IL1R1;HLA-B;HLA-A;HLA-F;HLA-E;ADCY9;VDAC2;ANAPC4;VDAC1;TLN2;TP53;ATF4;ANAPC2;PIK3R3;CCNB2;PPP3R1;HLA-DQA2;HLA-DQA1;STAT5A;EGR1;STAT5B;EGR2;HLA-DRB5;JUN;SMAD4;TGFB2;SMAD3;TGFB1;TGFB3;NFATC3;NFATC2…
Hedgehog signaling pathway	35/56	0.998696	0.999998	0	0	0.43953	0.000573547	GSK3B;CUL3;IHH;ARRB1;ARRB2;LRP2;GLI1;GLI3;GLI2;SCUBE2;HHAT;SHH;GRK3;CCND2;GRK2;CCND1;KIF3A;BOC;BTRC;PRKACA;PRKACB;CDON;CSNK1A1;SMURF1;PTCH1;TPTEP2-CSNK1E;PTCH2;CSNK1E;KIF7;DISP1;MOSMO;SMO;GPR161;SPOPL;CSNK1G1
Ether lipid metabolism	30/49	0.998775	0.999998	0	0	0.416465	0.000510533	GAL3ST1;LPCAT1;PLA2G3;PLD4;PLA2G6;PLD1;PLA2G7;PLB1;SELENOI;PLD2;ENPP2;CEPT1;ENPP6;PLA2G12A;PLA2G4F;PLA2G2D;PLA2G12B;PLA2G4C;PLA2G2A;PLA2G4A;PEDS1;PAFAH2;PEDS1-UBE2V1;LPCAT4;LPCAT2;CHPT1;PLPP3;PAFAH1B3;PLPP2;PAFAH1B1
Amoebiasis	68/102	0.99884	0.999998	0	0	0.526891	0.000611457	CXCL8;ITGAM;LAMC3;ITGB2;PIK3CD;CXCL1;LAMC2;LAMC1;PIK3CB;CXCL3;TNF;CXCL2;C8G;CASP3;CTSG;PRKACA;PRKACB;IL10;ARG2;IL1R1;PRKCB;ARG1;ACTN1;PRKCA;SERPINB9;ACTN4;PLCB3;PLCB4;COL4A2;IFNG;PIK3CA;COL4A1;COL4A4;IL1B;COL4A3;RAB7B;PLCB2;TLR4;VCL;RAB7A;TLR2;RAB5B;RAB5C;LAMA2;LAMA4;LAMA3;PIK3R3;CD1E;CD1D;CD1C;CD1B;CD1A;GNA14;GNA15;GNA11;CD14;TGFB2;TGFB1;TGFB3;LAMB2;FN1;NFKB1;COL1A1;IL6;COL3A1;COL1A2;GNAQ;RAB5A
Notch signaling pathway	37/59	0.998842	0.999998	0	0	0.443476	0.000513864	NOTCH2;HDAC2;NUMBL;MAML2;CTBP2;HDAC1;PSEN2;DTX1;DTX2;DTX3;PSEN1;RFNG;RBPJ;DTX4;DLL1;LFNG;DLL4;NCSTN;HEY1;HEY2;ATXN1L;DVL1;CIR1;HES1;PSENEN;PTCRA;TLE4;TLE2;TLE1;DTX3L;TLE6;KAT2B;HEYL;ADAM17;SNW1;MFNG;NUMB
Dopaminergic synapse	90/132	0.998846	0.999998	0	0	0.564225	0.000651504	GSK3B;GSK3A;CALML3;PPP2R2A;ARRB1;ARRB2;COMT;SLC6A3;PPP1CB;PPP3CA;PPP3CB;GNGT2;PPP3CC;CREB3L3;PPP2R1B;CREB3L4;KIF5C;PPP2R5E;AKT2;KIF5B;KIF5A;PRKACA;PRKACB;SLC18A2;PRKCB;PPP2R5A;PRKCA;PPP2R5D;FOS;PPP2R5C;CREB3;PLCB3;CREB1;LRTOMT;PLCB4;PLCB2;ATF4;CREB5;CAMK2B;GRIA2;CAMK2D;DDC;MAOB;MAOA;CAMK2A;ITPR1;GNAI3;ITPR2;CACNA1D;ITPR3;CACNA1C;GNAI1;GNAI2;PPP2CA;MAPK9;PPP2CB;GNG10;GRIN2A;GNG3;MAPK8;GNG2;GNG4;PP…
Epstein-Barr virus infection	142/202	0.998853	0.999998	0	0	0.622505	0.000714533	RB1;RBPJ;TNF;ICAM1;CCND3;TBK1;CCND2;CCND1;AKT2;MYC;PSMD3;PSMD1;CIR1;SKP2;HLA-DOA;B2M;HLA-DOB;MAP3K7;IFNAR2;MAP2K3;MAP2K4;ENTPD1;USP7;ENTPD3;HLA-B;TAP2;ENTPD8;TAP1;HLA-A;HLA-F;RUNX3;HLA-E;SAP30;BTK;TP53;IFNAR1;PSMD12;PSMD11;PIK3R3;IRAK1;CD19;PLCG2;FADD;MAP2K7;HLA-DQA2;HLA-DQA1;MAP2K6;LYN;HLA-DRB5;JUN;GADD45B;GADD45A;ISG15;NFKB1;GADD45G;NFKB2;NFKBIA;CXCL10;IL6;MAVS;SNW1;CDK6;CDK4;CDK2;CYCS;HLA-DRA;…
Choline metabolism in cancer	65/98	0.99891	0.999998	0	0	0.518934	0.000565716	DGKD;SLC44A4;SLC44A1;DGKB;DGKA;PIK3CD;PIK3CB;AKT2;RAC2;RAC3;RAC1;HRAS;PDGFRB;PDGFRA;LYPLA1;PLA2G4F;MAP2K2;PCYT1A;PRKCB;PDPK1;PLA2G4C;PLA2G4A;PRKCA;TSC1;FOS;GPCPD1;SLC5A7;PIK3CA;DGKK;PLPP3;RAF1;SOS1;PLPP2;SOS2;DGKH;SLC22A4;SLC22A3;SLC22A5;SLC22A2;SLC22A1;WAS;PIK3R3;PLD1;PLD2;MAPK9;MAPK8;NRAS;PDGFD;PDGFC;MAPK1;PIP5K1B;PLCG1;WASF1;RALGDS;MAPK3;JUN;CHKB;CHKA;EGF;MTOR;MAPK10;RPS6KB1;RPS6KB2;CHPT1;KRAS
Renal cell carcinoma	44/69	0.998964	0.999998	0	0	0.463962	0.000481023	CDKN1A;FH;CUL2;ARAF;PIK3CD;PIK3R3;PIK3CB;ETS1;CRKL;RAP1B;NRAS;RAP1A;AKT2;MAPK1;PAK6;RAC1;VHL;PAK3;HRAS;PAK2;PAK5;MAPK3;PAK4;EGLN1;JUN;TGFB2;MAP2K2;EGLN2;TGFB1;BAD;TGFB3;HGF;TFE3;GAB1;BRAF;RBX1;BUB1B-PAK6;VEGFA;PIK3CA;KRAS;RAF1;SOS1;MET;SOS2
Proteoglycans in cancer	144/205	0.998992	0.999998	0	0	0.620853	0.00062634	ARAF;IHH;FZD10;FGF2;TNF;ACTB;ACTG1;IGF1R;PPP1CB;CCND1;AKT2;MYC;KDR;PLCE1;PRKACA;PRKACB;MAP2K2;WNT5B;PRKCB;HGF;RPS6;WNT5A;ANK2;PRKCA;ANK3;ANK1;TIAM1;SMO;EZR;RAF1;TP53;DDX5;PXN;TWIST2;ITPR1;PIK3R3;ITPR2;ITPR3;IQGAP1;VTN;RRAS;PLCG2;PLCG1;WNT1;WNT2;WNT3;WNT4;WNT10B;WNT10A;TGFB2;FZD2;TGFB1;FZD5;FZD4;CAV2;WNT3A;FZD7;CAV1;PTCH1;RDX;FN1;IGF2;BRAF;COL1A1;COL1A2;SDC1;HPSE;ITGB1;CDKN1A;WNT2B;ITGB3;HSPB2;PIK…
Melanoma	46/72	0.999087	0.999998	0	0	0.466343	0.000425855	RB1;CDKN1A;ARAF;PTEN;PIK3CD;PIK3R3;PIK3CB;FGF1;FGF2;IGF1R;FGF7;NRAS;CCND1;FGF9;CDH1;AKT2;PDGFD;PDGFC;E2F1;E2F2;MAPK1;POLK;BAK1;HRAS;MAPK3;PDGFRB;PDGFRA;MAP2K2;GADD45B;BAD;CDKN2A;EGF;GADD45A;HGF;BRAF;DDB2;GADD45G;CDK6;PIK3CA;CDK4;BAX;KRAS;RAF1;MET;TP53;FGF10
Cortisol synthesis and secretion	41/65	0.999091	0.999998	0	0	0.450365	0.000409736	SCARB1;ITPR1;ADCY3;ITPR2;ADCY2;CACNA1D;ITPR3;CACNA1C;ADCY8;CACNA1F;ADCY7;CACNA1H;CACNA1G;CYP17A1;CACNA1I;CREB3L3;CREB3L4;GNA11;PRKACA;PDE8A;PRKACB;LDLR;HSD3B2;PBX1;MRAP;POMC;CREB3;NR4A1;PLCB3;ADCY9;CREB1;PLCB4;NCEH1;STAR;GNAQ;AGTR1;ORAI1;PLCB2;KCNK3;ATF4;CREB5
RNA degradation	51/79	0.999104	0.999998	0	0	0.480023	0.000430274	BTG3;BTG2;BTG1;DIS3L;ENO2;TENT4A;TENT4B;ENO4;EDC3;PABPC4L;MTREX;NUDT16;CNOT6L;DIS3;PABPC4;PABPC5;PATL1;XRN1;C1D;XRN2;PABPC1;DCP2;DDX6;ZCCHC7;PARN;TOB2;TOB1;HSPD1;EXOSC5;EXOSC10;EXOSC4;EXOSC9;DHX36;EXOSC8;EXOSC2;EXOSC1;HSPA9;PNPT1;LSM1;LSM2;CNOT4;PAN2;LSM7;PFKL;CNOT7;PAN3;CNOT2;CNOT8;CNOT9;PFKM;PFKP
Transcriptional misregulation in cancer	134/192	0.999141	0.999998	0	0	0.607675	0.000521933	CD86;CCNT2;SPI1;CCNT1;JMJD1C;PLAT;MPO;HOXA11;IGF1R;HOXA10;HOXA9;CCND2;MYC;MEN1;MEF2C;RUNX2;RUNX1;MAF;MYCN;DDIT3;ERG;TP53;CSF1R;DDX5;KMT2A;FOXO1;FUT8;TSPAN7;H3C1;H3C3;CD14;H3C2;PROM1;H3C4;ELANE;GRIA3;H3C7;H3C6;NGFR;SMAD1;BCL11B;GADD45B;JUP;FUS;GADD45A;ZBTB16;ASPSCR1;DEFA3;HMGA2;DEFA1;FLI1;NFKB1;PBX1;GADD45G;IL6;NR4A3;BCL6;ID2;REL;ATM;CDK14;BCL2L1;CD40;CDKN1A;CDKN1B;CXCL8;FLT1;ITGAM;LDB1;FLT3;SIX1;…
Protein digestion and absorption	68/103	0.999322	0.999998	0	0	0.511713	0.000347097	KCNK5;PRSS1;COL16A1;COL14A1;ELN;SLC8A1;COL10A1;PRSS2;CPA3;SLC36A1;SLC6A19;SLC36A3;CELA2B;SLC36A2;MME;ATP1B3;ATP1B2;ATP1B1;ACE2;SLC9A3;SLC7A7;COL4A2;MEP1B;SLC7A8;COL4A1;SLC7A9;COL4A4;KCNQ1;COL4A3;COL6A1;COL8A2;COL8A1;COL21A1;COL6A3;COL6A6;COL6A5;COL17A1;COL15A1;KCNE3;COL11A1;SLC1A1;COL11A2;ATP1A4;ATP1A3;SLC3A1;SLC3A2;SLC1A5;ATP1A1;COL19A1;DPP4;KCNN4;SLC38A2;SLC36A4;COL24A1;KCNJ13;SLC16A10;PGA5;COL…
Porphyrin and chlorophyll metabolism	25/43	0.999497	0.999998	0	0	0.366307	0.000184151	UGT1A10;FECH;COX15;CPOX;UGT2B28;ALAD;HEPH;UGT1A5;UGT1A4;UGT2A3;UGT1A3;UGT1A8;COX10;EARS2;UGT1A7;UGT1A6;UGT2B10;UGT1A1;MMAB;UROS;CP;HMBS;FXN;BLVRA;UGT2B7
Aminoacyl-tRNA biosynthesis	41/66	0.999527	0.999998	0	0	0.432246	0.000204352	AARS1;KARS1;TRNS1;TRNS2;YARS1;TRNG;TRNF;TRNE;TRND;NARS1;QARS1;TRNC;TRNA;TRNN;TRNM;IARS2;TRNK;VARS2;EARS2;TRNI;TRNH;TRNW;TRNT;TRNR;MARS2;TRNQ;MARS1;TRNP;DARS2;GATB;DARS1;TRNY;WARS2;TRNL2;LARS2;SEPSECS;SARS2;TRNL1;TARS2;TARS3;FARSA
Glycosaminoglycan degradation	2019-09-01	0.999534	0.999998	0	0	0.237582	0.00011064	HGSNAT;NAGLU;HYAL1;HEXB;HYAL3;IDS;HPSE;GNS;ARSB
Neurotrophin signaling pathway	79/119	0.999577	0.999998	0	0	0.519915	0.00021987	YWHAE;GSK3B;PIK3CD;CALML3;FASLG;PIK3CB;CRKL;IKBKB;RPS6KA3;RPS6KA6;RPS6KA5;AKT2;RPS6KA2;ARHGDIB;RAC1;HRAS;MAP2K2;PDPK1;RIPK2;PRKCD;MATK;GAB1;IRAK3;IRAK4;RHOA;PIK3CA;RAF1;SOS1;TP53;SOS2;ATF4;CAMK2B;SHC2;CAMK2D;SHC1;CAMK2A;PSEN2;PIK3R3;PSEN1;FOXO3;RAP1B;MAPK9;MAPK8;NRAS;RAP1A;MAPK7;IRAK1;IRAK2;PLCG2;MAPK1;PLCG1;MAP2K7;CAMK2G;SH2B3;MAP2K5;MAPK3;NGFR;MAP3K3;JUN;MAP3K1;BDNF;BAD;KIDINS220;BRAF;MAPK14;NF…
Drug metabolism	71/108	0.999578	0.999998	0	0	0.505261	0.00021337	UGT1A10;TPMT;DPYS;MPO;HPGDS;CYP2D7;CYP2D6;AOX1;UGT2A3;TK1;UGT2B10;GSTO2;UGT1A1;NME2;NME4;UPB1;NME1;NME6;RRM2B;NME7;DPYD;CMPK1;CYP2E1;UMPS;CES2;UGT2B7;CES1;MAOB;ADH1C;MAOA;ADH1B;ADH1A;GSTP1;GMPS;MGST1;UGT2B28;CYP3A4;CYP3A5;ADH5;ADH6;TYMP;NME1-NME2;ADH4;CYP2B6;ALDH3B1;UGT1A5;UGT1A4;UGT1A3;UGT1A8;UGT1A7;UGT1A6;GSTM4;GSTM3;GSTM2;FMO1;FMO2;FMO3;FMO4;FMO5;UCKL1;CYP2C8;UCK2;UCK1;GSTA5;NAT1;IMPDH1;GSTA2;…
Rap1 signaling pathway	146/210	0.999607	0.999998	0	0	0.599609	0.000235475	CSF1;CTNND1;CALML3;FGF1;FGF2;ACTB;CRKL;ACTG1;IGF1R;FGF7;FGF9;CDH1;AKT2;RASSF5;KDR;PLCE1;MAGI1;MAP2K3;PDGFRB;PDGFRA;MAP2K2;PRKCB;HGF;MAGI3;MAGI2;PRKCA;PGF;TIAM1;ADCY9;PRKD3;PFN4;TLN2;PFN1;RAF1;PFN3;SKAP1;EPHA2;PFN2;CSF1R;FPR1;LPAR1;LPAR2;PIK3R3;LPAR3;LPAR4;RASGRP2;PRKCZ;EFNA4;RAP1GAP;RASGRP3;RAP1B;GRIN2A;RAP1A;RRAS;PDGFD;PDGFC;PLCG1;RALGDS;MAP2K6;VASP;NGFR;FYB1;INSR;BRAF;GRIN2B;GNAO1;AFDN;EFNA3;LP…
Mucin type O-glycan biosynthesis	20/36	0.99962	0.999998	0	0	0.32973	0.000125321	GALNT7;GALNT11;GALNT6;GALNT14;GALNT5;GALNT13;GALNT16;GALNT2;GALNT18;GALNT1;GALNT17;GCNT1;C1GALT1;GALNT10;C1GALT1C1;GCNT3;ST6GALNAC3;ST3GAL1;ST6GALNAC4;ST3GAL2
Glucagon signaling pathway	70/107	0.999658	0.999998	0	0	0.498113	0.000170619	CRTC2;PRKAG2;SLC2A2;CALML3;PYGM;PYGL;PRKAG3;GYS1;PPP3CA;PPP3CB;PPP3CC;CREB3L3;CREB3L4;AKT2;PRKACA;PRKACB;CPT1A;PRKAB2;PRMT1;PPP4R3A;PPP4R3B;CPT1C;PHKA2;SIRT1;CREB3;PLCB3;CREB1;PLCB4;SIK1;SIK2;PPARA;FBP1;PLCB2;ATF4;CREB5;CAMK2B;PFKFB1;CAMK2D;PRKAA1;PRKAA2;CAMK2A;ITPR1;ITPR2;ITPR3;ADCY2;ACACB;ACACA;FOXO1;LDHC;LDHB;LDHA;PPP3R1;PPP4C;PCK1;PPARGC1A;CAMK2G;PCK2;PDHA1;GCGR;PHKB;G6PC1;GCK;PFKL;GNAQ;CALM1…
Cushing syndrome	105/155	0.99967	0.999998	0	0	0.552399	0.000182393	RB1;SCARB1;AHR;FZD10;CCND1;CREB3L3;CREB3L4;PRKACA;PDE8A;PRKACB;MEN1;USP8;MAP2K2;WNT5B;WNT5A;ADCY9;ARMC5;AGTR1;ORAI1;ATF4;KMT2A;TCF7;ITPR1;ITPR2;CACNA1D;ITPR3;CACNA1C;CACNA1F;CACNA1H;CRHR1;CACNA1G;RAP1B;CACNA1I;RAP1A;DVL1;WNT1;WNT2;WNT3;WNT4;WNT10B;WNT10A;FZD2;FZD5;FZD4;WNT3A;FZD7;BRAF;PBX1;NR4A1;CDK6;NCEH1;STAR;CDK4;GNAQ;CDK2;WDR5B;GSK3B;CDKN1A;CDKN1B;WNT2B;ASH2L;WDR5;WNT9B;AXIN2;WNT16;MRAP;CREB3…
Thyroid hormone signaling pathway	80/121	0.999696	0.999998	0	0	0.513564	0.000156007	GSK3B;THRB;THRA;ITGB3;ATP2A3;ATP2A2;PIK3CD;ATP2A1;PIK3CB;ACTB;ACTG1;CASP9;MED14;MED13;CCND1;PLCZ1;SIN3A;AKT2;MYC;PLCE1;ITGAV;PRKACA;SLC16A2;PRKACB;HRAS;NCOA1;MED1;NCOA2;MAP2K2;PRKCB;PDPK1;NCOA3;ATP1B3;PRKCA;ATP1B2;ATP1B1;KAT2B;PLCB3;MED24;PLCB4;PIK3CA;RAF1;TP53;PLCB2;MYH7;NOTCH2;PFKFB2;HDAC2;HDAC3;HDAC1;ATP1A4;PIK3R3;ATP1A3;ATP1A1;FOXO1;NRAS;PLN;RXRA;MED30;PLCG2;MAPK1;PLCG1;RXRG;WNT4;MAPK3;BAD;ST…
Arachidonic acid metabolism	37/61	0.999703	0.999998	0	0	0.406324	0.000120619	ALOX15;PLA2G3;ALOX12;LTC4S;PLA2G6;PTGS2;PLB1;PTGS1;HPGDS;CYP2B6;ALOX5;GGT1;PTGDS;CYP2J2;GGT5;PLA2G12A;PLA2G4F;PLA2G2D;GPX1;PLA2G12B;PTGIS;GPX3;PTGES2;CYP4F2;EPHX2;PTGES3;PLA2G4C;CYP4F3;PLA2G2A;GPX8;GPX7;PLA2G4A;ALOX15B;CYP2C8;PRXL2B;CYP2E1;PTGES
Glycerolipid metabolism	37/61	0.999703	0.999998	0	0	0.406324	0.000120619	AGPAT5;DGKD;DGKB;MOGAT2;DGKA;MOGAT1;AKR1B1;AGPAT1;LCLAT1;AGPAT3;AGPAT4;TKFC;ALDH2;ALDH1B1;LIPG;GPAT3;GK;AGK;GLYCTK;MBOAT1;MBOAT2;CEL;ALDH3A2;PLPP5;PLPP4;AKR1B10;GPAM;PNPLA3;DGKK;PLPP3;ALDH7A1;PLPP2;LPIN2;LPIN3;ALDH9A1;DGKH;PNPLA2
ECM-receptor interaction	56/88	0.999736	0.999998	0	0	0.4609	0.000121644	ITGB1;ITGB4;LAMC3;ITGB3;TNC;LAMC2;LAMC1;COMP;TNN;DAG1;ITGB8;TNR;ITGAV;ITGB7;CD36;ITGB6;ITGA4;VWF;GP1BA;NPNT;COL4A2;COL4A1;COL4A4;COL4A3;COL6A1;ITGA8;COL6A3;COL6A6;ITGA6;CD47;COL6A5;ITGA5;FREM1;CD44;FREM2;ITGA9;TNXB;LAMA2;LAMA4;LAMA3;HMMR;THBS2;VTN;RELN;SV2B;SV2A;CHAD;SPP1;LAMB2;FN1;COL1A1;COL1A2;ITGA10;ITGA11;COL9A1;SDC1
Other glycan degradation	2018-08-01	0.999757	0.999998	0	0	0.211171	5.12474e-05	NEU3;MANBA;NEU4;FUCA1;HEXB;MAN2B1;MAN2C1;GBA2
Linoleic acid metabolism	15/29	0.99976	0.999998	0	0	0.282672	6.7715e-05	CYP2J2;PLA2G12A;PLA2G2D;PLA2G4F;PLA2G12B;ALOX15;PLA2G2A;PLA2G4C;PLA2G3;PLA2G4A;CYP3A4;PLA2G6;PLB1;CYP2C8;CYP2E1
Aldosterone synthesis and secretion	63/98	0.999771	0.999998	0	0	0.473937	0.000108677	SCARB1;CALML3;CREB3L3;CREB3L4;PRKACA;PRKACB;CAMK1D;PRKCB;PRKCE;ATP1B3;PRKCA;ATP1B2;ATP1B1;CREB3;PLCB3;ADCY9;CREB1;PLCB4;PRKD3;AGTR1;ORAI1;DAGLB;PLCB2;CAMK1G;ATF4;CREB5;CAMK2B;CAMK2D;CAMK2A;ITPR1;ATP1A4;ITPR2;ADCY3;ATP1A3;CACNA1D;ITPR3;ADCY2;CACNA1C;ATP1A1;CACNA1F;ADCY8;ADCY7;CACNA1H;CACNA1G;CACNA1I;GNA11;CAMK2G;LDLR;KCNJ5;HSD3B2;PDE2A;ATP2B4;ATP2B3;ATP2B1;NR4A2;POMC;NR4A1;STAR;GNAQ;CAMK4;CALM1;CA…
Glycosylphosphatidylinositol (GPI)-anchor biosynthesis	13/26	0.999777	0.999998	0	0	0.263857	5.8794e-05	PGAP1;PIGO;GPAA1;PIGZ;PIGV;PIGC;PIGB;PIGA;PIGK;PIGL;PIGF;GPLD1;PIGH
Mineral absorption	36/60	0.999781	0.999998	0	0	0.395317	8.65773e-05	SLC46A1;SLC40A1;ATP1A4;ATP1A3;MT1X;ATP1A1;CLCN2;SLC8A1;MT2A;ATP7B;HEPH;TRPM7;ATP7A;TRPM6;SLC39A4;SLC34A3;SLC34A2;SLC6A19;SLC31A1;VDR;SLC34A1;SLC11A2;ATP2B4;ATP2B3;CYBRD1;ATP1B3;SLC30A1;ATP1B2;ATP2B1;ATP1B1;SLC8A3;SLC9A3;MT1F;SLC26A9;STEAP2;SLC26A6
Growth hormone synthesis, secretion and action	78/119	0.999797	0.999998	0	0	0.500661	0.000101495	GSK3B;PIK3CD;IRS2;PIK3CB;CRKL;GHR;CREB3L3;CREB3L4;AKT2;PRKACA;JAK2;JUNB;PRKACB;HRAS;MAP2K3;MAP2K4;MAP2K2;PRKCB;PRKCA;FOS;SSTR1;SSTR2;CREB3;PLCB3;ADCY9;CREB1;PLCB4;PIK3CA;RAF1;SOS1;PLCB2;SOS2;ATF4;CREB5;SHC2;SHC1;ITPR1;GNAI3;ITPR2;PIK3R3;ADCY3;CACNA1D;ITPR3;ADCY2;CACNA1C;CACNA1F;ADCY8;ADCY7;GNAI1;GNAI2;SOCS3;MAPK9;MAPK8;NRAS;SOCS1;GNA11;PLCG2;MAPK1;PLCG1;MAP2K6;MAPK3;STAT5A;STAT5B;MAP3K1;STAT1;STA…
Lysine degradation	38/63	0.999801	0.999998	0	0	0.400542	7.97563e-05	PRDM7;GCDH;SETD2;ECHS1;KMT2A;SETD7;DOT1L;DLST;PLOD2;PRDM2;PLOD1;DHTKD1;ACAT1;NSD3;HYKK;ALDH2;ALDH1B1;NSD1;NSD2;PRDM16;SMYD2;KMT5B;KMT5A;HADH;COLGALT1;AASS;KMT5C;SETDB2;PIPOX;ASH1L;ALDH3A2;HADHA;TMLHE;EHHADH;ALDH7A1;DLD;ALDH9A1;EZH2
Insulin resistance	70/108	0.999804	0.999998	0	0	0.484888	9.48657e-05	GSK3B;CRTC2;PTEN;PIK3CD;PRKAG2;SLC2A2;IRS2;PYGM;PIK3CB;PYGL;SLC2A4;TNF;PRKAG3;PPP1CB;IKBKB;RPS6KA3;GYS1;RPS6KA6;CREB3L3;CREB3L4;AKT2;RPS6KA2;MLX;CD36;CPT1A;PRKAB2;PRKCB;PDPK1;PRKCE;PRKCD;CREB3;CREB1;PPP1R3C;PIK3CA;PPP1R3E;TRIB3;SLC27A3;PPARA;SLC27A2;CREB5;PRKAA1;PRKAA2;PIK3R3;ACACB;PRKCZ;FOXO1;PTPA;SOCS3;MAPK9;MAPK8;PCK1;PPARGC1A;PPARGC1B;PCK2;MLXIP;GFPT2;INSR;STAT3;OGA;G6PC1;NFKB1;MTOR;PPP1CA;NF…
Focal adhesion	138/201	0.999816	0.999998	0	0	0.575596	0.000105975	MYLK2;TNC;ACTB;ARHGAP35;MYLK3;CRKL;ACTG1;IGF1R;MYLK4;COMP;PPP1CB;CCND3;CCND2;CCND1;TNN;AKT2;KDR;TNR;PDGFRB;PDGFRA;PRKCB;ACTN1;HGF;PRKCA;ACTN4;PGF;COL4A2;COL4A1;MYL2;COL4A4;COL4A3;TLN2;RAF1;MYL9;VCL;SHC2;SHC1;PXN;PIK3R3;MYL12A;MYL12B;RAP1B;VTN;RAP1A;PDGFD;PDGFC;CHAD;PIP5K1B;VASP;JUN;CAV2;CAV1;FN1;BRAF;PARVA;COL1A1;DIAPH1;COL1A2;PARVG;ITGA10;ITGA11;COL9A1;ITGB1;GSK3B;FLT1;ITGB4;LAMC3;ITGB3;PTEN;PIK…
Renin secretion	42/69	0.999837	0.999998	0	0	0.409819	6.68774e-05	PTGER4;ADCYAP1R1;GUCY1B1;PDE1C;PDE1B;PTGER2;GNAI3;ITPR1;ITPR2;CALML3;ADRB1;CACNA1D;ITPR3;ADRB2;CACNA1C;CACNA1F;GNAI1;AQP1;GNAI2;PPP3CA;EDNRA;PPP3CB;PPP3R1;PPP3CC;PRKACA;PRKACB;CTSB;GUCY1A2;EDN1;GUCY1A1;EDN2;ACE;PLCB3;CREB1;PLCB4;GNAQ;AGTR1;ORAI1;REN;CALM1;PLCB2;CALM2
RNA polymerase	16/31	0.999845	0.999998	0	0	0.281366	4.35303e-05	POLR3A;POLR2A;POLR2B;POLR1A;POLR3C;POLR1B;POLR2D;POLR1C;POLR3E;POLR2F;POLR1E;POLR2G;POLR1F;POLR3H;POLR1H;POLR3K
mTOR signaling pathway	103/154	0.999857	0.999998	0	0	0.531056	7.59626e-05	FZD10;TNF;IGF1R;RPS6KA3;RPS6KA6;AKT2;RPS6KA2;SESN2;GRB10;ATP6V1E1;SKP2;ATP6V1G2;MAP2K2;WNT5B;PRKCB;RPS6;WNT5A;PRKCA;TSC1;CLIP1;RRAGC;RRAGB;RRAGD;ULK1;RAF1;ATP6V1A;SEH1L;NPRL2;NPRL3;PIK3R3;DVL1;ATP6V1H;WNT1;ATP6V1D;WNT2;ATP6V1C1;WNT3;ATP6V1C2;WNT4;WNT10B;WNT10A;FZD2;WDR59;FZD5;FZD4;WNT3A;FZD7;INSR;BRAF;PRR5;GSK3B;WNT2B;CAB39L;PTEN;PIK3CD;PIK3CB;IKBKB;MLST8;HRAS;RNF152;CHUK;PDPK1;STRADA;STRADB;WNT9…
Cocaine addiction	28/49	0.999858	0.999998	0	0	0.351468	4.9794e-05	GRIA2;DDC;MAOB;MAOA;GNAI3;SLC6A3;GNAI1;GNAI2;GRIN2A;CREB3L3;CREB3L4;PRKACA;PRKACB;SLC18A2;JUN;BDNF;GRIN2B;NFKB1;GRIN1;GRIN2D;CREB3;GRIN3B;CREB1;PPP1R1B;FOSB;ATF4;CREB5;CDK5R1
Viral carcinogenesis	139/203	0.999861	0.999998	0	0	0.570606	7.91728e-05	RB1;HDAC11;UBE3A;RBPJ;CDC20;CCND3;CCND2;CREB3L3;CCND1;CREB3L4;CHEK1;H4C2;H4C1;H4C4;PRKACA;SKP2;H4C3;PRKACB;H4C6;H4C5;USP7;ACTN1;HLA-B;MRPS18B;ACTN4;HLA-A;HLA-F;SND1;HLA-E;H4C15;H4C14;H4C13;H4C12;H4C11;ATP6V0D1;IL6ST;ATP6V0D2;TP53;ATF4;HPN;PXN;UBR4;PIK3R3;GTF2E1;C3;SCIN;PMAIP1;H4C8;LYN;STAT5A;STAT5B;EGR2;JUN;EGR3;H4C9;NFKB1;NFKB2;NFKBIA;DLG1;SNW1;CDK6;CDK4;CDK2;REL;CDK1;YWHAE;CDKN1A;CDKN1B;DDX3X;Y…
Thyroid hormone synthesis	46/75	0.999867	0.999998	0	0	0.417799	5.53922e-05	ATP1A4;ITPR1;ADCY3;ATP1A3;ITPR2;ADCY2;ITPR3;TTF2;ATP1A1;LRP2;TTF1;ADCY8;ADCY7;ASGR2;SLC5A5;TPO;CREB3L3;CREB3L4;IYD;PRKACA;PRKACB;TSHB;DUOX2;GPX1;GPX3;PRKCB;GSR;GPX8;GPX7;ATP1B3;PRKCA;ATP1B2;ATP1B1;PDIA4;CREB3;PLCB3;ADCY9;CREB1;PLCB4;GNAQ;CANX;ALB;SLC26A4;PLCB2;ATF4;CREB5
Human cytomegalovirus infection	155/225	0.999883	0.999998	0	0	0.581494	6.82974e-05	RB1;CCL4L2;CALML3;TNF;CRKL;TBK1;CREB3L3;CCND1;CREB3L4;AKT2;MYC;PRKACA;B2M;PRKACB;IL6R;PDGFRA;MAP2K2;IL1R1;PRKCB;HLA-B;TAP2;TAP1;PRKCA;TSC1;HLA-A;HLA-F;HLA-E;ADCY9;RAF1;TP53;ATF4;CCL3L3;PXN;ITPR1;PIK3R3;ITPR2;ITPR3;GNG10;PPP3R1;FADD;MAP2K6;NFATC3;NFATC2;NFATC1;GNG12;GNG11;NFKB1;NFATC4;GNAO1;NFKBIA;IL6;CDK6;CXCL12;CDK4;GNAQ;GNB2;GNB4;CYCS;GNB3;GNB5;CALM1;CALM2;GSK3B;CDKN1A;CXCL8;ITGB3;CGAS;PIK3CD;F…
HIF-1 signaling pathway	70/109	0.999889	0.999998	0	0	0.472341	5.23833e-05	CDKN1A;CDKN1B;FLT1;TFRC;SERPINE1;PIK3CD;PIK3CB;ENO2;ENO4;HK2;IGF1R;HK1;HK3;AKT2;TIMP1;IL6R;PDK1;EDN1;MAP2K2;PRKCB;IFNGR1;IFNGR2;RPS6;CYBB;PRKCA;RBX1;IFNG;PIK3CA;HKDC1;ALDOB;EIF4E2;TLR4;CAMK2B;CAMK2D;PFKFB3;CUL2;CAMK2A;PIK3R3;LDHC;LDHB;LDHA;ERBB2;MKNK2;PGK1;PLCG2;MAPK1;PGK2;PLCG1;VHL;CAMK2G;MAPK3;EGLN1;PDHA1;ANGPT2;EGLN2;EGF;INSR;STAT3;NFKB1;MTOR;VEGFA;IL6;PFKL;RPS6KB1;RPS6KB2;TEK;PFKM;LDHAL6A;PFK…
Steroid hormone biosynthesis	36/61	0.999893	0.999998	0	0	0.379413	4.05854e-05	UGT1A10;DHRS11;HSD17B3;UGT2B28;HSD17B12;HSD17B6;COMT;CYP3A4;CYP19A1;CYP3A5;HSD17B8;CYP17A1;CYP3A7;HSD11B1;HSD11B2;STS;SULT1E1;HSD17B2;UGT1A5;CYP1B1;UGT2A3;UGT1A4;UGT1A3;UGT1A8;UGT1A7;UGT1A6;UGT2B10;CYP3A7-CYP3A51P;UGT1A1;HSD3B2;SRD5A1;CYP7B1;SULT2B1;LRTOMT;CYP2E1;UGT2B7
Phospholipase D signaling pathway	98/148	0.999906	0.999998	0	0	0.515343	4.83325e-05	DGKD;DGKB;DGKA;AKT2;PDGFRB;PDGFRA;MAP2K2;PRKCA;TSC1;ADCY9;AGTR1;DGKK;PLPP3;RAF1;PLPP2;DGKH;PTGFR;SHC2;SHC1;LPAR1;LPAR2;PIK3R3;LPAR3;LPAR4;PLD1;PIK3R6;PIK3R5;PLD2;RRAS;PDGFD;PDGFC;PLCG2;PIP5K1B;PLCG1;RALGDS;INSR;LPAR5;LPAR6;CXCL8;PIK3CD;PIK3CB;GRM1;PIK3CG;GRM5;GRM6;GRM8;FCER1A;HRAS;PLA2G4F;FCER1G;SYK;SPHK2;SPHK1;PLA2G4C;GAB1;PLA2G4A;RRAS2;AVPR1A;GAB2;F2;RHOA;DNM2;PLCB3;MRAS;PLCB4;PIK3CA;KIT;AVP;MS…
Autophagy	90/137	0.999906	0.999998	0	0	0.503593	4.71552e-05	PTEN;WDR41;PIK3CD;IRS2;PIK3CB;ZFYVE1;IGF1R;TBK1;LAMP1;CTSL;AKT2;RB1CC1;LAMP2;MLST8;PRKACA;MAP3K7;PRKACB;HRAS;RAB8A;CTSB;SH3GLB1;RUBCN;GABARAPL1;MAP2K2;PDPK1;DAPK2;ATG9A;PRKCD;RRAS2;TSC1;ATG14;PRAP1;ATG12;RAB33B;ERN1;MRAS;RRAGC;PIK3CA;RRAGB;RRAGD;AKT1S1;ATG4C;ATG4B;ULK1;PIK3C3;SMCR8;RAF1;RAB7B;SQSTM1;ATG4D;RAB7A;BECN1;RAB1A;PRKAA1;PRKAA2;STX17;ITPR1;PIK3R4;PIK3R3;MTMR4;TANK;CAMKK2;PPP2CA;MAPK9;PPP…
Caffeine metabolism	2023-06-01	0.999915	0.999998	0	0	0.0528326	4.46524e-06	NAT1
Ubiquitin mediated proteolysis	92/140	0.999917	0.999998	0	0	0.504001	4.16019e-05	DET1;UBE2D4;UBE2D2;UBE2D3;CBLC;UBE2D1;CBLB;UBE2L6;UBE3A;UBE3B;BRCA1;UBE2Z;CDC20;HERC4;HERC3;CDC23;HERC2;HERC1;UBE2Q2;CDC27;FBXO4;BTRC;SKP2;SKP1;PIAS3;ANAPC7;FBXW8;FBXW7;UBE2E2;UBE4A;UBE2QL1;UBE4B;MID1;PIAS2;RBX1;DDB2;DDB1;UBE2R2;ANAPC4;NHLRC1;BIRC6;BIRC7;UBA52;BIRC2;ANAPC2;BIRC3;PRKN;CUL7;CUL5;UBA7;UBA6;CUL3;CUL2;NEDD4L;XIAP;RNF7;CBL;RCHY1;RHOBTB2;UBE2J1;SOCS3;COP1;FZR1;SOCS1;UBC;UBR5;VHL;RPS27A;…
Prostate cancer	61/97	0.999921	0.999998	0	0	0.44598	3.52246e-05	RB1;GSK3B;CDKN1A;CDKN1B;ARAF;PTEN;PIK3CD;PLAT;PIK3CB;IGF1R;CASP9;IKBKB;CCND1;CREB3L3;CREB3L4;AKT2;HRAS;PDGFRB;PDGFRA;HSP90AA1;MAP2K2;CHUK;PDPK1;INSRR;MMP9;CREB3;CREB1;ZEB1;PIK3CA;ERG;RAF1;SOS1;TP53;SOS2;ATF4;CREB5;GSTP1;TCF7;LEF1;PIK3R3;TMPRSS2;KLK3;FOXO1;NRAS;PDGFD;PDGFC;ERBB2;E2F1;E2F2;MAPK1;MAPK3;TCF7L2;TCF7L1;BAD;EGF;BRAF;NFKB1;MTOR;NFKBIA;CDK2;KRAS
Regulation of actin cytoskeleton	149/218	0.999926	0.999998	0	0	0.567006	4.17765e-05	CYFIP2;NCKAP1;MYLK2;CHRM4;CHRM5;ARAF;ARPC5L;FGF1;FGF2;ACTB;ARHGAP35;MYLK3;CRKL;ACTG1;MYLK4;PPP1CB;FGF7;FGF9;CFL2;CFL1;PIP4K2A;PIP4K2B;PIP4K2C;PDGFRB;PDGFRA;MAP2K2;ACTN1;ACTN4;TIAM1;MYL2;SPATA13;PFN4;EZR;PFN1;RAF1;MYL9;PFN3;VCL;PFN2;PXN;LPAR1;LPAR2;PIK3R3;IQGAP1;LPAR4;IQGAP2;IQGAP3;MYL12A;KNG1;MYL12B;SCIN;RRAS;PDGFD;PDGFC;MYH14;NCKAP1L;PIP5K1B;RDX;FN1;BRAF;ARPC4;ARPC5;GNG12;SSH2;SSH1;DIAPH1;DIAPH2…
Insulin secretion	53/86	0.999934	0.999998	0	0	0.422808	2.80803e-05	GLP1R;RYR2;SNAP25;RAB3A;SLC2A2;RIMS2;CCKAR;PCLO;CREB3L3;CREB3L4;PRKACA;PRKACB;ABCC8;PRKCB;ATP1B3;PRKCA;ATP1B2;ATP1B1;CREB3;PLCB3;ADCY9;CREB1;PLCB4;PLCB2;STX1A;VAMP2;ATF4;CREB5;RAPGEF4;CAMK2B;ADCYAP1R1;CAMK2D;CAMK2A;ATP1A4;ADCY3;ATP1A3;ADCY2;CACNA1D;ITPR3;ATP1A1;CACNA1C;ADCY8;CACNA1F;ADCY7;GNA11;KCNMB1;KCNN1;KCNN2;KCNN3;KCNN4;CAMK2G;GCK;GNAQ
Autoimmune thyroid disease	30/53	0.999938	0.999998	0	0	0.343706	2.13628e-05	CD86;CD40;CD80;PRF1;FASLG;HLA-DMA;TPO;HLA-DMB;CTLA4;HLA-DOA;HLA-DOB;HLA-DQA2;TSHB;HLA-DQA1;HLA-DPA1;IL10;HLA-DRB5;HLA-B;GZMB;HLA-A;HLA-F;HLA-E;CD40LG;IL5;CD28;HLA-DPB1;FAS;HLA-DRA;HLA-DRB1;HLA-DQB1
Endocrine and other factor-regulated calcium reabsorption	30/53	0.999938	0.999998	0	0	0.343706	2.13628e-05	KLK1;CLTC;ATP1A4;ATP1A3;PTH1R;ATP1A1;AP2A2;SLC8A1;CALB1;AP2S1;PRKACA;PRKACB;KL;PRKCB;VDR;ATP2B4;ATP2B3;ATP1B3;PRKCA;ATP1B2;ATP2B1;ATP1B1;RAB11A;DNM2;SLC8A3;PLCB3;ADCY9;PLCB4;GNAQ;PLCB2
Serotonergic synapse	72/113	0.999944	0.999998	0	0	0.461972	2.58332e-05	GABRB3;GABRB2;GABRB1;ARAF;HTR2B;HTR2A;SLC6A4;HTR7;GNGT2;CYP2D7;CYP2D6;CASP3;PRKACA;PRKACB;HRAS;SLC18A2;PLA2G4F;KCND2;PRKCB;DUSP1;HTR3E;TRPC1;PLA2G4C;PLA2G4A;PRKCA;HTR3A;PLCB3;PLCB4;RAF1;PLCB2;DDC;MAOB;MAOA;ALOX15;ITPR1;GNAI3;ITPR2;ALOX12;CACNA1D;ITPR3;CACNA1C;CACNA1F;PTGS2;GNAI1;GNAI2;PTGS1;GNG10;GNG3;NRAS;CYP4X1;GNG2;GNG4;ALOX5;GNG7;MAPK1;KCNN2;KCNJ3;MAPK3;CYP2J2;KCNJ5;BRAF;GNG12;ALOX15B;GNG11;G…
Synaptic vesicle cycle	47/78	0.999953	0.999998	0	0	0.399174	1.87933e-05	ATP6V1A;NAPA;SNAP25;RAB3A;STXBP1;CLTC;SLC1A1;SLC1A2;SLC1A3;TCIRG1;AP2A2;SLC6A2;SLC1A7;SLC6A3;SLC6A4;RIMS1;AP2S1;ATP6V0A2;ATP6V1H;ATP6V0A4;SLC17A7;SLC17A8;STX3;ATP6V1E1;ATP6V0E2;ATP6V1G3;STX2;ATP6V1D;SLC18A2;ATP6V1C1;ATP6V0A1;ATP6V1C2;UNC13B;UNC13C;ATP6V1G2;SYT1;SLC6A13;SLC6A12;DNM2;STX1B;ATP6V1B2;ATP6V0D1;ATP6V0C;ATP6V0D2;STX1A;VAMP2;ATP6V1B1
Nicotine addiction	21/40	0.999955	0.999998	0	0	0.29136	1.30913e-05	GABRB3;CHRNB2;GABRA2;GABRQ;GABRB2;GRIA2;GABRP;GABRB1;CHRNA4;GABRA4;CHRNA6;GABRG3;GRIN2B;GRIN1;GRIN2D;GRIN2A;GRIN3B;SLC17A7;SLC17A8;GABRE;GRIA3
Glycerophospholipid metabolism	61/98	0.999956	0.999998	0	0	0.433822	1.89259e-05	ACHE;DGKD;LPGAT1;DGKB;DGKA;LPCAT1;LCLAT1;PLB1;LYPLA1;PLA2G12A;PLA2G4F;PCYT2;PCYT1A;PLA2G12B;PLA2G4C;PLA2G4A;GPCPD1;PLA2G15;PHOSPHO1;PLPP5;PLPP4;GPD2;GPD1;DGKK;PLPP3;PLPP2;DGKH;CDS1;AGPAT5;PLA2G3;PLD4;PLA2G6;PLD1;AGPAT1;AGPAT3;SELENOI;PLD2;AGPAT4;PGS1;PTDSS2;PTDSS1;GPAT3;CEPT1;PLA2G2D;CHKB;CHKA;PNPLA7;PLA2G2A;MBOAT1;MBOAT2;CRLS1;ETNPPL;GPAM;ETNK2;LPCAT4;ETNK1;LPCAT2;CHPT1;GPD1L;LPIN2;LPIN3
Endocytosis	173/252	0.999961	0.999998	0	0	0.574485	2.26366e-05	WASHC4;SH3GL3;WASHC5;TFRC;WIPF1;ZFYVE9;WIPF2;WIPF3;ARPC5L;CBLC;WASHC2C;CBLB;IGF1R;WASHC2A;ZFYVE27;KIF5C;KIF5B;KIF5A;VPS35;VPS36;SH3GL2;SH3GL1;SH3GLB1;PDGFRA;USP8;HLA-B;HLA-A;HLA-F;HLA-E;RNF41;ACAP2;ZFYVE16;ACAP1;RAB31;BIN1;RUFY2;RAB35;AMPH;CHMP4A;STAMBP;VPS25;STAM2;VPS28;RAB5B;RAB5C;AGAP2;AGAP1;NEDD4L;AGAP4;VPS26A;VPS26B;PLD1;PRKCZ;PLD2;GRK1;SNX4;GRK3;SNX2;GRK2;GRK5;GRK6;PIP5K1B;RAB11FIP3;RAB11FI…
Breast cancer	96/147	0.999961	0.999998	0	0	0.494745	1.9387e-05	RB1;GSK3B;CDKN1A;WNT2B;ARAF;PTEN;PIK3CD;FZD10;BRCA1;PIK3CB;FGF1;BRCA2;FGF2;IGF1R;FGF7;FRAT1;FRAT2;CCND1;FGF9;HEY1;AKT2;MYC;HEY2;TNFSF11;POLK;HRAS;NCOA1;MAP2K2;WNT5B;NCOA3;WNT5A;WNT9B;AXIN2;FOS;WNT16;DDB2;PIK3CA;KIT;RAF1;SOS1;TP53;SOS2;NOTCH2;SHC2;SHC1;TCF7;LEF1;LRP5;PIK3R3;WNT8B;DLL1;LRP6;DLL4;NRAS;WNT11;DVL1;ERBB2;E2F1;E2F2;MAPK1;HES1;BAK1;WNT1;WNT2;WNT3;WNT4;MAPK3;WNT10B;TCF7L2;JUN;WNT10A;TCF7L…
Oocyte meiosis	83/129	0.999961	0.999998	0	0	0.474424	1.84647e-05	YWHAE;YWHAB;CALML3;SMC3;IGF1R;CDC20;PPP1CB;RPS6KA3;PPP3CA;RPS6KA6;PPP3CB;CDC23;SLK;PPP3CC;PPP2R1B;PTTG1;PLCZ1;YWHAQ;PTTG2;PPP2R5E;RPS6KA2;CDC27;FBXO5;BTRC;PRKACA;PRKACB;SKP1;YWHAH;ANAPC7;SPDYE16;PPP2R5A;PPP2R5D;PPP2R5C;CDC25C;YWHAZ;RBX1;SMC1B;SGO1;ADCY9;ESPL1;ANAPC4;ANAPC2;CAMK2B;CAMK2D;CAMK2A;ITPR1;ITPR2;ADCY3;ITPR3;ADCY2;PKMYT1;ADCY8;ADCY7;AURKA;PPP2CA;CCNB2;PPP2CB;CCNB1;PPP3R1;MAPK1;BUB1;CAMK2…
RIG-I-like receptor signaling pathway	41/70	0.999969	0.999998	0	0	0.372268	1.15964e-05	CXCL8;DDX3X;TNF;TANK;IFIH1;IKBKB;MAPK9;MAPK8;CASP8;TBK1;TKFC;CASP10;TRIM25;FADD;AZI2;IKBKE;MAP3K7;MAP3K1;CHUK;TRAF2;ISG15;MAPK14;ATG12;MAPK12;NFKB1;MAPK13;MAPK10;NFKBIA;CXCL10;CYLD;MAPK11;SIKE1;MAVS;RNF125;IRF3;STING1;TRAF3;IFNE;IRF7;TBKBP1;NFKBIB
Progesterone-mediated oocyte maturation	62/100	0.999969	0.999998	0	0	0.429254	1.33387e-05	ARAF;PIK3CD;PIK3CB;IGF1R;RPS6KA3;STK10;RPS6KA6;CDC23;AKT2;RPS6KA2;CDC27;PRKACA;PRKACB;HSP90AA1;ANAPC7;SPDYE16;KIF22;CDC25C;CDC25B;CCNA2;ADCY9;PIK3CA;ANAPC4;RAF1;ANAPC2;GNAI3;PIK3R3;ADCY3;ADCY2;PKMYT1;ADCY8;ADCY7;GNAI1;AURKA;GNAI2;CCNB2;MAPK9;CCNB1;FZR1;MAPK8;MAPK1;BUB1;MAPK3;SPDYC;PLK1;SPDYE4;BRAF;MAPK14;MAPK12;MAPK13;MAD2L2;MAPK10;MAPK11;CPEB1;CDC16;CDK2;CDK1;KRAS;CPEB3;CPEB2;CPEB4;MAD2L1
Gastric cancer	97/149	0.999971	0.999998	0	0	0.490197	1.42876e-05	RB1;ARAF;FZD10;FGF1;FGF2;FGF7;FRAT1;FRAT2;CCND1;FGF9;CDH1;AKT2;MYC;MAP2K2;WNT5B;HGF;WNT5A;RAF1;TP53;SHC2;ABCB1;SHC1;TERC;TCF7;PIK3R3;DVL1;WNT1;WNT2;WNT3;WNT4;WNT10B;SMAD4;TGFB2;WNT10A;FZD2;SMAD3;TGFB1;FZD5;GADD45B;JUP;FZD4;GADD45A;TGFB3;WNT3A;FZD7;BRAF;GADD45G;CDK2;FGF10;GSK3B;CDKN1A;CDKN1B;WNT2B;PIK3CD;PIK3CB;SHH;POLK;HRAS;GAB1;WNT9B;AXIN2;WNT16;DDB2;TGFBR2;PIK3CA;SOS1;MET;SOS2;LEF1;LRP5;WNT8B;L…
Natural killer cell mediated cytotoxicity	84/131	0.999971	0.999998	0	0	0.46984	1.34302e-05	ITGB2;ARAF;ICAM2;PRF1;PIK3CD;FASLG;PIK3CB;ITGAL;TNF;ICAM1;PPP3CA;FCGR3A;PPP3CB;FCGR3B;PPP3CC;CASP3;TNFSF10;RAC2;RAC3;RAC1;HRAS;IFNAR2;VAV3;MAP2K2;FCER1G;SYK;PRKCB;IFNGR1;IFNGR2;HLA-B;PRKCA;HLA-A;VAV1;HLA-E;VAV2;NCR1;ZAP70;NCR3;TYROBP;IFNG;PIK3CA;LCK;CD48;LCP2;RAF1;SOS1;HCST;SOS2;IFNAR1;SHC2;SHC1;PIK3R3;PPP3R1;NRAS;KLRK1;KLRC4-KLRK1;SH3BP2;PLCG2;MAPK1;FYN;KLRC1;PLCG1;BID;MAPK3;MICB;KLRC2;KLRC3;SH2…
Glutathione metabolism	32/57	0.999972	0.999998	0	0	0.337171	9.57058e-06	GSTP1;MGST1;OPLAH;SRM;HPGDS;ANPEP;GGT1;GGT5;GSTM4;GSTM3;NAT8B;GGT7;GSTM2;GPX1;GGT6;GSTO2;GPX3;GSS;IDH1;GSR;IDH2;GPX8;GPX7;GCLC;GSTA5;NAT8;RRM2B;GSTA2;GSTA1;LAP3;GCLM;GSTM5
GABAergic synapse	54/89	0.999975	0.999998	0	0	0.406	1.02964e-05	GABRB3;GABRB2;GABRB1;ABAT;GPHN;GLS;GNGT2;PRKACA;GLUL;PRKACB;GABARAPL1;SLC38A1;PRKCB;SLC6A13;SLC6A12;PRKCA;GABRG3;ADCY9;HAP1;GLS2;GNAI3;ADCY3;ADCY2;CACNA1D;CACNA1C;ADCY8;CACNA1F;ADCY7;GNAI1;GNAI2;GNG10;GNG3;GNG2;GNG4;GNG7;GABRE;SLC38A3;SLC38A2;SLC38A5;GABRA2;GABRQ;GABRP;GABBR1;SLC12A5;GABRA4;GAD1;PLCL1;GNG12;GNG11;GNAO1;GNB2;GNB4;GNB3;GNB5
Necroptosis	104/159	0.999975	0.999998	0	0	0.496765	1.24681e-05	H2AC19;H2AC15;H2AC16;TNF;H2AC17;H2AC18;H2AC11;PYCARD;H2AC12;H2AC13;H2AC14;TNFSF10;CAPN1;GLUL;IFNAR2;ZBP1;H2AC8;TICAM2;H2AC7;H2AC4;CYBB;TICAM1;VDAC2;CHMP4A;VDAC1;PPIA;SQSTM1;PPID;IFNAR1;ALOX15;SPATA2;MACROH2A2;MACROH2A1;NLRP3;TRPM7;FADD;STAT5A;STAT5B;MLKL;TNFRSF10B;TNFRSF10A;CYLD;GLUD1;GLUD2;CHMP2B;H2AC21;H2AX;FAF1;TNFAIP3;FASLG;PYGM;PYGL;CASP8;AIFM1;CHMP1B;SMPD1;CHMP1A;CASP1;DNM1L;JAK2;JAK3;JAK1;…
Hepatitis C	102/157	0.999982	0.999998	0	0	0.48715	8.79316e-06	RB1;SCARB1;CD81;ARAF;PPP2R2A;CLDN2;IFIT1;CLDN1;TNF;TBK1;CCND1;PPP2R1B;AKT2;MYC;IFNAR2;MAP2K2;TICAM1;CLDN4;CLDN3;CLDN9;CLDN8;CLDN7;RAF1;TP53;IFNAR1;PIK3R3;SOCS3;FADD;EIF2AK1;EIF2AK3;BRAF;EIF2AK4;NFKB1;NFKBIA;CXCL10;MAVS;CDK6;CDK4;CDK2;CYCS;YWHAE;GSK3B;CDKN1A;YWHAB;PIK3CD;FASLG;PIK3CB;CASP9;CLDN22;IKBKB;CASP8;YWHAQ;CASP3;CLDN24;CLDN23;HRAS;IKBKE;JAK1;YWHAH;APAF1;CHUK;TRAF2;YWHAZ;CLDN10;IFNG;IRF3;PI…
TGF-beta signaling pathway	57/94	0.999983	0.999998	0	0	0.405272	6.88871e-06	BMPR2;ZFYVE9;TNF;PPP2R1B;MYC;NEO1;SKP1;ACVR1;TGIF1;FST;RGMB;DCN;RHOA;RBX1;RGMA;TGFBR2;GREM1;RBL1;TFDP1;ZFYVE16;IFNG;NBL1;ROCK1;CHRD;MICOS10-NBL1;ACVR1B;LTBP1;PPP2CA;PPP2CB;MAPK1;MAPK3;SMAD1;CDKN2B;SMAD4;TGFB2;SMAD3;TGFB1;SMURF1;TGFB3;BMP8B;INHBB;INHBA;SMAD6;ACVR2B;BMP7;GDF5;SMAD5;INHBE;SMAD7;BMP4;RPS6KB1;ID2;RPS6KB2;ID3;FMOD;NODAL;FBN1
cGMP-PKG signaling pathway	109/167	0.999984	0.999998	0	0	0.493516	7.85396e-06	MYLK2;GUCY1B1;CALML3;IRS2;MYLK3;SLC8A1;MYLK4;PPP1CB;EDNRA;RGS2;EDNRB;CREB3L3;CREB3L4;ADORA3;AKT2;GTF2I;MEF2A;GUCY1A2;GUCY1A1;MEF2C;MAP2K2;PRKCE;ATP1B3;ATP1B2;ATP1B1;ADCY9;AGTR1;PPIF;VDAC2;VDAC1;RAF1;MYL9;ATF4;NPR2;ITPR1;ITPR2;ADRB1;CACNA1D;ITPR3;ADRB2;CACNA1C;CACNA1F;KNG1;PIK3R6;PIK3R5;PPP3R1;KCNMB1;VASP;INSR;PDE2A;NFATC3;NFATC2;NFATC1;NFATC4;GNAQ;CALM1;CALM2;ATP2A3;ATP2A2;ATP2A1;ADRA1B;ADRA1A;PI…
Bile secretion	54/90	0.999985	0.999998	0	0	0.394627	5.7663e-06	SCARB1;UGT1A10;SLC4A2;SLC4A4;AQP1;CA2;UGT2A3;PRKACA;PRKACB;ABCC3;UGT2B10;ABCC4;ABCG5;ABCC2;UGT1A1;ATP1B3;ATP1B2;SLC51A;ATP1B1;SLC51B;SLC9A3;ADCY9;CFTR;UGT2B7;ABCG2;ABCB1;SLC22A1;ATP1A4;ADCY3;ATP1A3;UGT2B28;ADCY2;ATP1A1;HMGCR;ADCY8;CYP3A4;ADCY7;RXRA;UGT1A5;UGT1A4;KCNN2;UGT1A3;LDLR;UGT1A8;UGT1A7;UGT1A6;SLC10A1;SLC10A2;EPHX1;NR1H4;NR0B2;NCEH1;SLC22A8;SLC22A7
Ribosome	102/158	0.999988	0.999998	0	0	0.478335	5.87316e-06	RPL4;RPL5;RPL30;RPL3;RPL32;RPL31;RPL34;RPL10A;RPL8;RPL9;RPL6;RPL7;RPS15;RPS14;RPS17;RPS16;RPL18A;RPS19;RPS18;RPL36;RPL35;RPL38;RPL37;RPS11;RPL39;RPS10;RPS13;RPS12;RPS9;RPL21;RPL36A-HNRNPH2;RPS7;RPS8;RPL23;RPS5;RPS6;RPSA;RPL24;RPL27;RPL26;RPL29;RPL28;UBA52;MRPL19;MRPL17;MRPL12;MRPL11;RNA5-8SN3;RNA5-8SN2;RNA5-8SN5;RNA5-8SN4;RPL41;RPL3L;RPS25;RPS28;RPS27;RPL27A;RNR2;RPS20;RNR1;RPS21;RPS24;RPS23;MRPS…
Metabolism of xenobiotics by cytochrome P450	44/76	0.999988	0.999998	0	0	0.36186	4.209e-06	UGT1A10;ADH1C;ADH1B;ADH1A;GSTP1;MGST1;UGT2B28;CYP3A4;CYP3A5;ADH5;ADH6;HSD11B1;ADH4;AKR7A2;HPGDS;AKR7A3;CYP2B6;CYP2D7;CYP2D6;ALDH3B1;UGT1A5;CYP1B1;UGT2A3;UGT1A4;UGT1A3;UGT1A8;UGT1A7;UGT1A6;UGT2B10;GSTM4;GSTM3;GSTM2;GSTO2;UGT1A1;EPHX1;DHDH;AKR7L;GSTA5;CYP2S1;GSTA2;GSTA1;CYP2E1;UGT2B7;GSTM5
Staphylococcus aureus infection	57/95	0.99999	0.999998	0	0	0.394511	4.13612e-06	ITGAM;ITGB2;KRT23;DEFB1;ITGAL;FCAR;ICAM1;FCGR3A;FCGR3B;C3AR1;HLA-DOA;HLA-DOB;HLA-DPA1;IL10;FGG;MASP2;CFB;HLA-DQB1;C1QB;CFD;C1QA;SELPLG;C1S;CFH;C1R;C5AR1;CFI;PTAFR;FPR1;FPR3;PLG;FPR2;C2;C3;C5;HLA-DMA;HLA-DMB;DEFA1B;FCGR1A;HLA-DQA2;HLA-DQA1;HLA-DRB5;DEFA3;DEFA1;KRT10;SELP;KRT19;FCGR2A;KRT18;KRT17;KRT15;HLA-DPB1;HLA-DRA;FCGR2B;FCGR2C;HLA-DRB1;C1QC
Folate biosynthesis	2026-11-01	0.99999	0.999998	0	0	0.193378	1.99426e-06	DHFR;QDPR;MOCS2;AKR1B10;GCH1;PAH;AKR1B1;ALPL;PCBD2;MOCS1;GPHN
Fluid shear stress and atherosclerosis	88/139	0.99999	0.999998	0	0	0.453285	4.61465e-06	BMPR2;NCF1;NCF2;ITGB3;PIK3CD;SUMO4;CALML3;PLAT;PIK3CB;TNF;ACTB;ACTG1;ICAM1;IKBKB;THBD;SUMO1;CTSL;AKT2;SUMO2;KDR;RAC2;RAC3;ITGAV;RAC1;MAP3K7;ACVR1;MEF2A;MAP2K4;MEF2C;EDN1;HSP90AA1;CHUK;GSTO2;IL1R1;DUSP1;MMP2;CYBA;FOS;MMP9;RHOA;IFNG;PIK3CA;IL1B;PECAM1;ARHGEF2;SQSTM1;TP53;PRKAA1;PRKAA2;GSTP1;MGST1;PIK3R3;PRKCZ;MAPK9;MAPK8;MAPK7;CCL2;MAP2K7;MAP2K5;MAP2K6;GSTM4;GSTM3;GSTM2;JUN;VCAM1;CAV2;CAV1;MAPK14;S…
Protein export	2023-09-01	0.999992	0.999998	0	0	0.169539	1.30853e-06	SRP19;IMMP2L;SRP72;SEC61G;SRP54;SRPRB;SEC62;SRP9;SEC63
Purine metabolism	80/129	0.999993	0.999998	0	0	0.428887	3.00876e-06	GUCY1B1;HDDC3;PNP;PPAT;PDE4B;PDE4A;PGM2;ENPP4;ENPP3;NUDT16;PDE8A;PGM1;GUCY1A2;ENTPD1;GUCY1A1;ADSL;ENTPD2;ENTPD3;ENTPD4;ENTPD5;PDE4D;NME2;ENTPD8;AMPD1;NME4;DCK;NME1;NT5C3A;ADCY9;NME6;RRM2B;NME7;PDE5A;GART;GUCY2C;PRPS2;PDE1C;PDE1B;NPR2;AK1;AK2;GMPS;PRUNE1;AK3;GMPR;ADCY3;AK4;ADCY2;AK5;AK6;ADCY8;NT5C2;FHIT;ADCY7;AK8;PAPSS2;AK9;PAPSS1;NME1-NME2;NT5C;DGUOK;PDE6D;NT5M;PDE6B;PDE6A;PKLR;PDE6G;PDE2A;ADA2;P…
Longevity regulating pathway	61/102	0.999993	0.999998	0	0	0.39112	2.62791e-06	CLPB;PIK3CD;PRKAG2;IRS2;PIK3CB;PRKAG3;IGF1R;CREB3L3;SESN3;CREB3L4;AKT2;RB1CC1;SESN2;PRKACA;PRKACB;HRAS;APPL1;PRKAB2;ADIPOQ;TSC1;SIRT1;CREB3;ADCY9;CREB1;PIK3CA;AKT1S1;CAT;ULK1;EIF4E2;TP53;ATF4;CREB5;HDAC2;PRKAA1;PRKAA2;HDAC1;PIK3R3;ADCY3;ADCY2;FOXO3;ADCY8;ADCY7;FOXO1;CAMKK2;NRAS;EIF4EBP2;PPARGC1A;KL;INSR;HSPA6;HSPA2;SOD2;NFKB1;MTOR;RPS6KB1;CAMK4;RPS6KB2;BAX;KRAS;HSPA1B;HSPA1A
Pathways in cancer	357/531	0.999993	0.999998	0	0	0.532042	3.49344e-06	RB1;SPI1;IL23R;ARAF;CALML3;FZD10;CRKL;EDNRA;FRAT1;RASSF1;EDNRB;FRAT2;RPS6KA5;TFG;AKT2;MYC;RASSF5;PRKACA;SKP2;PRKACB;SKP1;IL15RA;PRKCB;DAPK2;FLT3LG;PRKCA;RUNX1;BCR;ADCY9;IL23A;AGTR1;TP53;CTBP2;TERC;LPAR1;MGST1;LPAR2;PIK3R3;KLK3;LPAR3;LPAR4;GNG10;PLCG2;PLCG1;FADD;RALGDS;GSTM4;STAT5A;GSTM3;WNT10B;STAT5B;GSTM2;JUN;WNT10A;FZD2;FZD5;JUP;GADD45B;FZD4;GADD45A;FZD7;FN1;IGF2;BRAF;GNG12;GNG11;GADD45G;LPAR5;…
Herpes simplex virus 1 infection	295/498	0.999994	0.999998	0	0	0.372616	2.40638e-06	TBK1;ZNF607;AKT2;ZSCAN32;ZNF846;ZNF841;ZNF169;B2M;DAXX;ZNF19;ZNF285;ZNF284;ZNF283;ZNF160;HLA-B;ZNF10;HLA-A;HCFC2;HLA-F;ZNF14;HLA-E;ZNF717;ZNF836;ZNF713;TP53;ZNF157;ZNF398;ZNF155;ZNF275;ZNF273;PIK3R3;CFP;ZNF26;C3;C5;ZNF708;ZNF707;ZNF701;FADD;HLA-DQA2;HLA-DQA1;ZNF267;HLA-DRB5;ZNF140;TNFSF14;EIF2AK1;EIF2AK3;EIF2AK4;PILRA;SRPK1;BST2;ZNF816;ZNF814;ZNF813;ZNF136;HLA-DRB1;ZNF256;ZNF254;ZNF132;ZNF250;ZNF…
MAPK signaling pathway	198/294	0.999994	0.999998	0	0	0.539691	3.45757e-06	ARAF;CRKL;RPS6KA4;RPS6KA3;RPS6KA6;RPS6KA5;AKT2;MYC;RPS6KA2;STMN1;KDR;PRKACA;PRKACB;DAXX;MEF2C;IL1R1;PRKCB;CACNA2D1;CACNA2D3;CACNA2D2;FLT3LG;PRKCA;CACNA2D4;MAPK8IP1;DDIT3;TP53;ATF4;EPHA2;NLK;PPP3R1;RRAS;PDGFD;PDGFC;CD14;NGFR;JUN;JUND;GADD45B;GADD45A;INSR;IGF2;NFATC3;BRAF;NFATC1;GNG12;GADD45G;ECSIT;AREG;IKBKB;PPP3CA;PPP3CB;PPP3CC;RAC2;RAC3;RAC1;HRAS;DUSP4;MAP4K1;DUSP5;DUSP2;DUSP3;DUSP1;RRAS2;FOS;DU…
Regulation of lipolysis in adipocytes	29/55	0.999994	0.999998	0	0	0.293682	1.87651e-06	PTGER3;GNAI3;AQP7;PIK3CD;ADCY3;PIK3R3;IRS2;ADCY2;ADRB1;PIK3CB;ADRB2;ADCY8;PTGS2;ADCY7;GNAI1;GNAI2;PTGS1;AKT2;NPY;PRKACA;PRKACB;TSHB;INSR;NPY1R;ADCY9;FABP4;PIK3CA;PLIN1;PNPLA2
Pathways of neurodegeneration	281/475	0.999994	0.999998	0	0	0.371903	2.37226e-06	ARAF;CALML3;UBE2L6;FZD10;ZFYVE1;FRAT1;TBK1;FRAT2;PSMD3;PSMD1;DAXX;GABARAPL1;CSNK2A1;PRKCB;CSNK2A3;CSNK2A2;TPTEP2-CSNK1E;PRKCA;CSNK1E;ATG14;DKK2;DKK4;DDIT3;UQCRC1;VDAC2;ULK1;VDAC1;UQCRC2;ATF6;UBA52;OPTN;STX1A;ATF4;PIK3R4;UBE2J1;GRIN2A;PPP3R1;COX3;COX2;COX1;NRBF2;PLCG1;FADD;WNT10B;TRAP1;WNT10A;XBP1;DNAH10;FZD2;FZD5;FZD4;FZD7;DNAH14;EIF2AK3;RAB39B;BRAF;GRIN2B;GRIN2D;ATG2A;NOX4;CALM1;CALM2;ATG2B;RYR1…
Ras signaling pathway	153/232	0.999994	0.999998	0	0	0.507422	3.18288e-06	CSF1;CALML3;FGF1;ETS1;FGF2;ETS2;IGF1R;RASSF1;FGF7;HTR7;TBK1;FGF9;AKT2;RASSF5;KDR;PLCE1;PRKACA;PRKACB;PDGFRB;PDGFRA;RALBP1;MAP2K2;PRKCB;HGF;FLT3LG;PRKCA;PGF;TIAM1;RIN1;RAF1;EPHA2;CSF1R;RAB5B;SHC2;RAB5C;SHC1;PIK3R3;PLA2G3;RASAL1;FOXO4;PLA2G6;PLD1;RASAL3;RASGRP2;STK4;EFNA4;RASGRP4;PLD2;RASGRP3;RAP1B;GNG10;GRIN2A;RAP1A;RRAS;PDGFD;PDGFC;PLCG2;ABL2;PLCG1;RALGDS;NGFR;BDNF;INSR;IGF2;GNG12;GNG11;GRIN2B;NF…
Olfactory transduction	58/440	0.999994	0.999998	0	0	0.0366213	2.28931e-07	ARRB1;CALML3;ARRB2;SLC8A1;OR2T10;OR52W1;RGS2;OR51Q1;PRKACA;PRKACB;OR52B6;OR52I1;OR2H2;OR10AD1;ANO2;OR2T5;OR2T3;OR2T2;OR2AT4;OR2B11;OR10A2;CNGB1;CAMK2B;SLC24A4;CAMK2D;OR52H1;PDE1C;OR51B2;PDE1B;OR52D1;CAMK2A;ADCY3;OR2T34;OR51J1;OR2T35;OR2S2;GRK3;GRK2;GNG7;OR4F29;OR51B6;OR51B5;OR51B4;CAMK2G;OR4F4;OR4F3;OR51I2;OR2T29;PDE2A;OR51M1;OR6N1;OR51I1;SLC8A3;OR4F15;OR13A1;CALM1;CALM2;OR2A14
Alzheimer disease	207/369	0.999994	0.999998	0	0	0.329144	1.96252e-06	ARAF;CALML3;FZD10;FRAT1;FRAT2;AKT2;PSMD3;PSMD1;CSNK2A1;CSNK2A3;CSNK2A2;TPTEP2-CSNK1E;CSNK1E;ATG14;DKK2;DKK4;DDIT3;UQCRC1;VDAC2;ULK1;VDAC1;UQCRC2;ATF6;ATF4;PIK3R4;PIK3R3;GRIN2A;NCSTN;PPP3R1;COX3;COX2;COX1;APOE;FADD;NRBF2;WNT10B;WNT10A;XBP1;FZD2;FZD5;FZD4;FZD7;INSR;EIF2AK3;BRAF;GRIN2B;GRIN2D;ATG2A;NOX4;CALM1;CALM2;ATG2B;IDE;IKBKB;PPP3CA;PPP3CB;TUBA1B;PPP3CC;TUBA1A;HRAS;PSENEN;MME;TUBB;WNT9B;BACE1;B…
Amyotrophic lateral sclerosis	204/364	0.999994	0.999998	0	0	0.328529	1.95159e-06	ACTB;TBK1;PSMD3;PSMD1;DAXX;GABARAPL1;ATG14;NUP93;NUP210L;DDIT3;UQCRC1;PFN4;ULK1;VDAC1;UQCRC2;PFN1;ATF6;TP53;OPTN;PFN3;ATF4;PFN2;POM121;SEH1L;PIK3R4;GRIN2A;PPP3R1;POM121C;NUP85;COX3;COX2;COX1;NUP88;NRBF2;XBP1;DNAH10;DNAH14;EIF2AK3;RAB39B;GRIN2B;GRIN2D;SETX;ATG2A;HNRNPA1L2;ATG2B;WDR41;PPP3CA;ACTR1A;PPP3CB;TUBA1B;PPP3CC;TUBA1A;NEFL;RAC1;NEFH;RAB8A;TUBB;TOMM40L;TUBB2B;PSMA4;TUBB2A;HAP1;PRKN;TOMM40;DE…
PI3K-Akt signaling pathway	224/354	0.999994	0.999998	0	0	0.44787	2.64036e-06	PPP2R2A;TCL1B;TCL1A;CREB3L3;PPP2R1B;CREB3L4;AKT2;MYC;MYB;KDR;FLT3LG;PRKCA;CDC37;TP53;ATF4;EPHA2;LPAR1;LPAR2;PIK3R3;LPAR3;LPAR4;PIK3R6;PIK3R5;GNG10;CD19;PDGFD;PDGFC;PCK1;PCK2;NGFR;INSR;FN1;IGF2;GNG12;GNG11;COL1A1;COL1A2;LPAR5;LPAR6;COL9A1;CDKN1A;CDKN1B;BRCA1;AREG;IKBKB;GYS1;GNGT2;RAC1;JAK2;HRAS;JAK3;JAK1;SYK;OSMR;KIT;SGK3;SGK1;SGK2;TLR4;TLR2;PHLPP1;TNXB;PKN3;PPP2CA;PPP2CB;NRAS;RELN;RXRA;SPP1;OSM;V…
Neuroactive ligand-receptor interaction	181/341	0.999994	0.999998	0	0	0.29106	1.69834e-06	NPFFR2;OXTR;PRSS1;NPFFR1;CHRM4;CHRM5;RXFP4;EDNRA;CYSLTR1;EDNRB;HTR7;CYSLTR2;ADORA3;C3AR1;LEPR;PRSS2;PTGDR;CHRNB2;UTS2R;CHRNB1;CHRNB4;NPFF;NPY1R;GABRG3;PRLR;TRHR;UTS2B;MTNR1A;LTB4R2;AGTR1;UTS2;PTGFR;GRIA2;ADCYAP1R1;CALCA;CALCRL;CHRNA2;GIPR;CHRNA4;C5AR1;CHRNA6;FPR1;LPAR1;LPAR2;FPR3;LPAR3;ADRB1;GPR83;FPR2;LPAR4;ADRB2;MCHR1;CRHR1;KNG1;C3;C5;GRIN2A;HRH1;CALCR;HRH2;TBXA2R;GALR1;TAC1;GRIA3;DRD5;NMB;TRPV…
Human papillomavirus infection	218/331	0.999994	0.999998	0	0	0.503357	2.91628e-06	RB1;PATJ;MAML2;PPP2R2A;FZD10;RBPJ;TBK1;CREB3L3;PPP2R1B;CREB3L4;AKT2;ATP6V1E1;PRKACA;PRKACB;HES6;ATP6V1G2;HLA-B;HLA-A;HLA-F;HLA-E;ATP6V0D1;ATP6V0D2;TP53;LLGL1;LLGL2;PIK3R3;PRKCZ;ATP6V0A2;ATP6V0A4;FADD;ATP6V1C1;ATP6V0A1;ATP6V1C2;WNT10B;WNT10A;FZD2;FZD5;FZD4;FZD7;FN1;COL1A1;COL1A2;COL9A1;ATM;CDKN1A;CDKN1B;IKBKB;LFNG;HEY1;HEY2;HRAS;IKBKE;JAK1;WNT9B;TUBG2;TUBG1;ATP6V0C;TLR3;PTGER4;TNXB;WNT8B;RFNG;PTGS…
MicroRNAs in cancer	110/310	0.999994	0.999998	0	0	0.13947	7.92566e-07	TNC;IRS2;CRKL;GLS;RASSF1;RPS6KA5;CCND2;CCND1;TNN;MYC;STMN1;PIM1;CYP1B1;TNR;SOX4;TP63;PDGFRB;PDGFRA;MAP2K2;PRKCB;PRKCE;TPM1;PRKCA;CDC25C;CDC25B;FOXP1;FSCN1;EZR;ZFPM2;RAF1;TP53;NOTCH2;DNMT1;ABCB1;SHC1;CDCA5;PIK3R3;EFNA4;SOCS1;PLCG2;BMF;PLCG1;WNT3;MCL1;ST14;TGFB2;UBE2I;WNT3A;RDX;HMGA2;NFKB1;EFNA3;CDK6;ATM;FGFR3;BCL2L2;EZH2;TRIM71;CDKN1A;CDKN1B;BMPR2;ITGB3;PTEN;PIK3CD;BRCA1;PIK3CB;IKBKB;CASP3;HRAS;AB…
Huntington disease	150/306	0.999994	0.999998	0	0	0.247151	1.39939e-06	NDUFA10;TUBB6;CREB3L3;CREB3L4;KIF5C;TUBB3;KIF5B;PSMD3;KIF5A;TUBB1;PSMD1;TGM2;SDHC;SDHD;ATG14;COX6B2;SDHA;SDHB;ERN1;UQCRC1;PPIF;TFAM;VDAC2;ULK1;VDAC1;ND1;UQCRC2;ND3;TP53;ND2;STX1A;ND5;ND4;GRIA2;ND6;PSMD12;PSMD11;ATP8;ATP6;PIK3R4;ITPR1;SLC1A2;SLC1A3;NRF1;KLC1;COX7A1;KLC4;COX3;COX2;COX1;NRBF2;CYC1;NDUFV3;MAP2K7;PPARGC1A;NDUFV1;GRIA3;DNAH10;BDNF;DNAH14;GRIN2B;GNAQ;ATG2A;CYCS;CYTB;DNAL4;RCOR1;DNAL1;AT…
Cytokine-cytokine receptor interaction	181/295	0.999994	0.999998	0	0	0.413177	2.3155e-06	CNTF;IL1RN;CSF3;CSF3R;CSF1;IL23R;CCL4L2;IL5RA;CXCL13;CXCL14;TNF;IL27RA;CXCL16;IL18RAP;TNFSF10;LEPR;TNFSF11;IL6R;TNFRSF4;IL13RA1;ACVR1;IFNAR2;IL15RA;IL4R;IL1R1;LIFR;PRLR;EDAR;IL23A;IL6ST;IFNAR1;CSF1R;CCL3L3;EBI3;IL20RB;CSF2RB;TNFRSF11B;TNFRSF11A;CSF2RA;THPO;NGFR;TGFB2;XCR1;TGFB1;TNFSF14;TGFB3;TNFSF12;TNFRSF9;IL31RA;LIF;TNFRSF10C;GDF1;TNFRSF10B;IFNLR1;INHBB;TNFRSF10A;PPBP;INHBA;GDF5;BMP7;INHBE;BMP4…
Prion disease	147/273	0.999995	0.999998	0	0	0.302053	1.65595e-06	NCF1;NCF2;NCF4;NDUFA10;TNF;TUBB6;CREB3L3;CREB3L4;KIF5C;TUBB3;KIF5B;PSMD3;KIF5A;TUBB1;PSMD1;PRKACA;PRKACB;CSNK2A1;CSNK2A3;CSNK2A2;PRKCD;CYBB;CYBA;SDHC;SDHD;COX6B2;SDHA;SDHB;DDIT3;UQCRC1;PPIF;VDAC2;VDAC1;ND1;UQCRC2;ND3;ND2;ND5;ATF4;ND4;ND6;PSMD12;PSMD11;ATP8;ATP6;ITPR1;PIK3R3;ITPR2;CACNA1D;ITPR3;CACNA1C;CACNA1F;KLC1;COX7A1;KLC4;STIP1;C5;GRIN2A;PPP3R1;C6;C7;COX3;COX2;COX1;CYC1;NDUFV3;NDUFV1;EGR1;PRN…
Calcium signaling pathway	155/240	0.999995	0.999998	0	0	0.477131	2.54961e-06	MYLK2;OXTR;CHRM5;CALML3;FGF1;FGF2;MYLK3;SLC8A1;MYLK4;EDNRA;CYSLTR1;FGF7;EDNRB;HTR7;CYSLTR2;FGF9;KDR;PLCE1;PRKACA;PRKACB;PDGFRB;PDGFRA;PRKCB;HGF;PRKCA;PHKA2;TRHR;ADCY9;LTB4R2;STIM1;STIM2;AGTR1;ORAI2;PPIF;ORAI1;VDAC2;VDAC1;PTGFR;PDE1C;PDE1B;ITPR1;ITPR2;ADRB1;CACNA1D;ITPR3;MST1R;ADRB2;CACNA1C;CACNA1F;CACNA1E;CACNA1H;CACNA1G;CACNA1I;GRIN2A;PPP3R1;HRH1;HRH2;TBXA2R;PDGFD;PDGFC;PLCG2;PLCG1;DRD5;PHKB;GRI…
Parkinson disease	125/249	0.999995	0.999998	0	0	0.260753	1.39227e-06	NDUFA10;CALML3;UBE2L6;TUBB6;KIF5C;TUBB3;KIF5B;PSMD3;KIF5A;TUBB1;PSMD1;PRKACA;PRKACB;DAXX;SDHC;SDHD;COX6B2;SDHA;SDHB;ERN1;DDIT3;UQCRC1;PPIF;VDAC2;VDAC1;ND1;UQCRC2;ND3;ATF6;TP53;UBA52;ND2;ND5;ATF4;ND4;ND6;PSMD12;PSMD11;MAOB;UBA7;MAOA;ATP8;ATP6;ITPR1;HTRA2;ITPR2;ITPR3;KLC1;COX7A1;UBE2J1;KLC4;UBC;COX3;COX2;COX1;PLCG1;CYC1;NDUFV3;NDUFV1;TRAP1;XBP1;EIF2AK3;CYCS;UBA1;CYTB;CALM1;CALM2;MCU;BCL2L1;NFE2L2;T…
Chemical carcinogenesis	135/239	0.999995	0.999998	0	0	0.337639	1.78151e-06	RB1;UGT1A10;AHR;FGF2;RPS6KA3;RPS6KA6;CCND3;FGF7;HPGDS;CREB3L3;CCND1;FGF9;CREB3L4;AKT2;MYC;RPS6KA2;KPNA6;CYP1B1;TNFSF11;KPNA7;KPNA4;KPNA5;PRKACA;KPNA2;PRKACB;KPNA3;KPNA1;PAQR8;CHRNB2;UGT2B10;CYP3A7-CYP3A51P;CHRNB4;PAQR7;MAP2K2;PAQR5;PRKCB;PRKCA;ADCY9;CYP2E1;RAF1;ATF4;NOTCH2;CHRNA4;MGST1;PIK3R3;ADRB1;CACNA1D;ADRB2;CACNA1C;CACNA1F;HSD11B1;CYP2B6;WNT1;GSTM4;STAT5A;GSTM3;STAT5B;GSTM2;JUN;VDR;EPHX2;EPH…
Thermogenesis	113/232	0.999995	0.999998	0	0	0.245739	1.2854e-06	KLB;SMARCB1;NDUFA10;ACTB;ACTG1;RPS6KA3;RPS6KA6;CREB3L3;CREB3L4;RPS6KA2;DPF3;PRKACA;PRKACB;MAP2K3;CPT1A;PRKAB2;SMARCC1;ACSL1;RPS6;ACSL6;ACSL5;ACSL4;SDHC;TSC1;ACSL3;SDHD;CPT1C;COX6B2;SDHA;SDHB;ADCY9;UQCRC1;ND1;UQCRC2;ND3;ND2;ND5;ND4;COX19;ND6;ATP8;COX15;COX18;ATP6;COX7A1;PRDM16;COX3;COX2;COX11;COX1;CYC1;NDUFV3;PPARGC1A;NDUFV1;COX10;COA1;SMARCA2;ADCY10;NDUFAF7;NDUFAF4;NDUFAF5;CYTB;COX20;PRKAG2;PRKAG…
cAMP signaling pathway	138/216	0.999995	0.999998	0	0	0.463211	2.40811e-06	OXTR;CALML3;PPP1CB;EDNRA;CREB3L3;CREB3L4;AKT2;PLCE1;SOX9;PRKACA;PRKACB;MAP2K2;NPY1R;ATP1B3;ATP1B2;ATP1B1;TIAM1;ADCY9;ORAI1;RAF1;MYL9;CFTR;GRIA2;ADCYAP1R1;SUCNR1;GIPR;PIK3R3;ADRB1;CACNA1D;ADRB2;CACNA1C;CACNA1F;PLD1;PLD2;HCAR2;RAP1B;GRIN2A;HCAR1;RAP1A;RRAS;GRIA3;DRD5;JUN;BDNF;PTCH1;BRAF;NFATC1;GRIN2B;NFKB1;GRIN2D;NFKBIA;ADCY10;AFDN;GRIN3B;FXYD1;PPP1R1B;CALM1;CALM2;GLP1R;RYR2;ATP2A3;ATP2A2;PIK3CD;AT…
Lysosome	78/128	0.999995	0.999998	0	0	0.40965	2.11293e-06	SCARB2;HEXB;CLTC;CTSZ;CTSW;CTSV;TCIRG1;LIPA;LITAF;CTSS;AP4M1;MFSD8;LAPTM4B;CTSO;LAMP1;NAGLU;GM2A;AP1G1;CTSL;HYAL1;LAMP3;CTSK;SMPD1;LAMP2;HYAL3;AP1S2;IDS;ACP2;AP3S2;CTSG;AP1S3;CTSF;CTSE;CTSB;HGSNAT;MANBA;ATP6AP1;ENTPD4;GAA;SLC11A2;AP3B1;PLA2G15;NPC1;DNASE2;ATP6V0D1;ATP6V0D2;ATP6V0C;CD63;ASAH1;GNS;CLN5;GGA2;CLN3;GGA3;PSAP;ATP6V0A2;SLC17A5;ATP6V1H;AP4S1;ATP6V0A4;ARSB;AP1M1;ATP6V0A1;CTSA;CD164;NAPSA;…
Ovarian steroidogenesis	26/51	0.999995	0.999998	0	0	0.273847	1.39155e-06	SCARB1;ADCY3;ADCY2;ADCY8;PTGS2;ADCY7;CYP19A1;IGF1R;CYP17A1;ALOX5;HSD17B2;CYP1B1;PRKACA;PRKACB;LDLR;CYP2J2;PLA2G4F;HSD3B2;INSR;PLA2G4C;PLA2G4A;ADCY9;STAR;FSHR;ACOT2;ACOT4
Diabetic cardiomyopathy	109/203	0.999995	0.999998	0	0	0.301853	1.51783e-06	NCF1;NCF2;NCF4;NDUFA10;PPP1CB;MPC1;AKT2;MPC2;PDK4;PDK3;PDK2;PRKCB;PRKCD;CYBB;PRKCA;CYBA;SDHC;SDHD;COX6B2;SDHA;SDHB;AGTR1;UQCRC1;PPIF;VDAC2;VDAC1;ND1;UQCRC2;ND3;ND2;ND5;ND4;ND6;ATP8;ATP6;PIK3R3;PRKCZ;AGER;COX7A1;COX3;COX2;COX1;CYC1;NDUFV3;NDUFV1;TGFB2;ACE;PDHA1;SMAD3;TGFB1;TGFB3;INSR;GFPT2;NFKB1;COL1A1;COL1A2;REN;CYTB;RYR2;GSK3B;ATP2A3;PTEN;ATP2A2;PIK3CD;ATP2A1;PIK3CB;SLC2A4;GYS1;CPT2;RAC2;CD36;RA…
Pancreatic secretion	60/102	0.999995	0.999998	0	0	0.375434	1.87962e-06	RYR2;PRSS1;AMY2A;AMY2B;RAB3D;ATP2A3;ATP2A2;ATP2A1;SLC4A2;SLC4A4;CCKAR;CA2;CD38;RAC1;PRSS2;RAB8A;CPA3;PLA2G12A;CELA2B;PLA2G12B;AMY1A;PRKCB;AMY1B;TRPC1;AMY1C;ATP1B3;PRKCA;ATP1B2;CEL;ATP1B1;RHOA;PLCB3;ADCY9;PLCB4;KCNQ1;PLCB2;CFTR;ITPR1;ATP1A4;ITPR2;PLA2G3;ADCY3;ATP1A3;ITPR3;ADCY2;ATP1A1;ADCY8;ADCY7;RAP1B;RAP1A;SLC12A2;PLA2G2D;PLA2G2A;ATP2B4;ATP2B3;RAB27B;ATP2B1;RAB11A;TPCN2;GNAQ
RNA transport	101/186	0.999995	0.999998	0	0	0.309836	1.51757e-06	CYFIP2;EIF4A1;RNU1-3;RNVU1-4;POP7;RNU1-1;POP1;FMR1;GEMIN2;RPP30;PNN;PABPC4L;RPP38;EIF1AX;THOC1;THOC2;TRNT1;THOC5;RPP25L;SRRM1;THOC6;NUP93;DDX39B;NUP210L;EEF1A2;GEMIN4;RPP21;GEMIN5;GEMIN7;RPP25;EIF1B;POM121;SEH1L;RNU6-9;FXR1;FXR2;POM121C;NUP85;TPR;EIF4EBP2;NUP88;EIF2B4;EIF2B3;EIF2B2;UBE2I;NUP155;FUS;ALYREF;RPP40;PYM1;UPF3B;NUP153;EIF2S2;MAGOHB;EIF5;RNVU1-18;NXF2B;RNPS1;RNVU1-7;EIF4G3;EIF4G1;NXT1;S…
Protein processing in endoplasmic reticulum	100/171	0.999995	0.999998	0	0	0.368489	1.75931e-06	ERO1A;ERO1B;UBE2D4;TUSC3;UBXN2A;UBE2D2;UBE2D3;UBE2D1;CAPN1;SEC62;SEC63;SKP1;DNAJB12;UBE4B;YOD1;PDIA4;RBX1;ERN1;SELENOS;DDIT3;DNAJB11;PLAA;PREB;ATF6;ATF4;SAR1B;HSPA4L;SEL1L;UBE2J1;ATXN3;HSPH1;BAG2;SSR1;MAP2K7;SEC31B;SEC31A;TXNDC5;EDEM3;XBP1;EIF2AK1;EDEM2;HSPA6;EIF2AK3;EIF2AK4;HSPA2;NPLOC4;DNAJC10;STT3B;RNF185;NFE2L2;TRAM1;PRKCSH;HERPUD1;SEC61G;MAN1A1;UBXN4;UBXN6;HSP90AA1;SSR4;SSR2;RAD23A;TRAF2;RAD…
JAK-STAT signaling pathway	97/162	0.999995	0.999998	0	0	0.390924	1.83838e-06	CNTF;CSF3;CSF3R;IL23R;IL5RA;IL27RA;CCND3;CCND2;CCND1;AKT2;MYC;LEPR;PIM1;IL6R;IL13RA1;IFNAR2;PDGFRB;IL15RA;PDGFRA;PIAS3;IL4R;CISH;LIFR;PRLR;PIAS2;IL23A;IL6ST;RAF1;STAM2;IFNAR1;IL20RB;PIK3R3;CSF2RB;CSF2RA;SOCS3;SOCS1;THPO;SOCS7;MCL1;SOCS5;STAT5A;STAT5B;LIF;IFNLR1;STAM;IL6;IL5;IL7;IL9;IL7R;BCL2L1;CDKN1A;FHL1;IL24;PIK3CD;PIK3CB;GHR;AOX1;JAK2;HRAS;JAK3;JAK1;IL10;IL11;IFNGR1;IL15;IFNGR2;IL19;OSMR;IFNG;…
Insulin signaling pathway	83/137	0.999995	0.999998	0	0	0.403357	1.88742e-06	GSK3B;ARAF;INPPL1;PIK3CD;PRKAG2;CALML3;CBLB;IRS2;PYGM;PIK3CB;PYGL;SLC2A4;HK2;PRKAG3;CRKL;HK1;PPP1CB;IKBKB;GYS1;HK3;AKT2;FLOT1;FLOT2;PRKACA;PRKACB;HRAS;PRKAB2;MAP2K2;PDPK1;RPS6;TSC1;PHKA2;PPP1R3F;PPP1R3C;PRKAR1B;PIK3CA;PRKAR1A;PPP1R3E;HKDC1;RAF1;EIF4E2;SOS1;FBP1;SOS2;RHOQ;SHC2;PRKAA1;PRKAA2;SHC1;PIK3R3;CBL;ACACB;PRKCZ;ACACA;FOXO1;SOCS3;MAPK9;MAPK8;NRAS;SOCS1;PRKAR2A;MKNK2;MAPK1;PCK1;PPARGC1A;PCK2;…
Non-alcoholic fatty liver disease	81/155	0.999995	0.999998	0	0	0.285822	1.32376e-06	GSK3B;GSK3A;CXCL8;NDUFA10;PIK3CD;PRKAG2;IRS2;FASLG;PIK3CB;TNF;PRKAG3;IKBKB;CASP7;CASP8;AKT2;CASP3;LEPR;MLX;RAC1;IL6R;PRKAB2;ADIPOQ;SDHC;TRAF2;SDHD;FOS;COX6B2;SDHA;SDHB;ERN1;NDUFS8;NDUFS7;PIK3CA;DDIT3;IL1B;UQCRC1;NDUFS2;NDUFS1;CYP2E1;UQCRC2;PPARA;ATF4;CEBPA;PRKAA1;PRKAA2;NDUFA4L2;PIK3R3;COX7A1;SOCS3;MAPK9;MAPK8;RXRA;COX3;COX2;COX1;CYC1;NDUFV3;BID;NDUFV1;MLXIP;JUN;XBP1;TGFB1;NDUFA5;PKLR;INSR;EIF2AK…
Spliceosome	82/150	0.999995	0.999998	0	0	0.315361	1.44571e-06	ISY1;RNU1-3;RNVU1-4;TCERG1;RBM25;RNU1-1;DDX46;HNRNPU;SNRPD2;SNRPD1;SNRNP70;BCAS2;RBM17;AQR;BUD31;THOC1;PRPF40A;THOC2;WBP11;CDC40;PRPF4;PRPF6;DDX39B;SYF2;PPIE;SRSF3;PPIH;SRSF4;SNRPA1;SRSF5;SRSF7;SLU7;SNRPA;SNRPB;RBM22;SF3B4;DDX5;SF3B3;DHX8;SF3B6;DDX23;SRSF1;RNU6-9;SNU13;U2AF1;PRPF8;PUF60;PCBP1;TRA2B;TRA2A;HNRNPA1;SF3B1;SMNDC1;SRSF10;SF3A3;PRPF38B;HNRNPA3;PPIL1;SF3A1;CCDC12;FUS;ALYREF;HSPA6;CWC15;H…
Retrograde endocannabinoid signaling	84/148	0.999995	0.999998	0	0	0.343621	1.56871e-06	GABRB3;GABRB2;FAAH;GABRB1;NDUFA10;GRM1;RIMS1;GRM5;GNGT2;PRKACA;PRKACB;PRKCB;PRKCA;GABRG3;PLCB3;ADCY9;NDUFS8;PLCB4;NDUFS7;NDUFS2;ND1;NDUFS1;ND3;DAGLB;ND2;PLCB2;ND5;ND4;GRIA2;ND6;ITPR1;GNAI3;NDUFA4L2;ITPR2;ADCY3;ABHD6;CACNA1D;ITPR3;ADCY2;CACNA1C;CACNA1F;ADCY8;PTGS2;ADCY7;GNAI1;GNAI2;MAPK9;GNG10;GNG3;MAPK8;GNG2;CNR1;GNG4;GNG7;MAPK1;SLC17A7;NDUFV3;SLC17A8;GABRE;NDUFV1;GRIA3;KCNJ3;MAPK3;GABRA2;GABRQ;G…
Signaling pathways regulating pluripotency of stem cells	83/143	0.999995	0.999998	0	0	0.362494	1.6382e-06	GSK3B;BMPR2;WNT2B;RIF1;PIK3CD;FZD10;PIK3CB;FGF2;IGF1R;AKT2;MYC;SMARCAD1;HOXA1;JAK2;HRAS;JAK3;JAK1;ACVR1;MAP2K2;WNT5B;WNT5A;WNT9B;LIFR;PAX6;AXIN2;WNT16;DUSP9;PIK3CA;HOXB1;IL6ST;RAF1;TCF7;PIK3R3;WNT8B;ACVR1B;NRAS;WNT11;DVL1;MAPK1;PCGF1;WNT1;SKIL;WNT2;WNT3;WNT4;MAPK3;SMAD1;WNT10B;SMAD4;WNT10A;FZD2;SMAD3;FZD5;FZD4;WNT3A;PCGF5;FZD7;PCGF2;WNT7B;ESRRB;PCGF3;STAT3;LIF;WNT7A;INHBB;INHBA;KLF4;MAPK14;SMAD5;…
Spinocerebellar ataxia	74/143	0.999995	0.999998	0	0	0.280259	1.26564e-06	RYR1;KCNC3;ATP2A3;ATP2A2;PIK3CD;RORA;ATP2A1;PIK3CB;RBPJ;GRM1;KAT5;OPA1;AKT2;RB1CC1;PSMD3;PSMD1;PRKCB;KCND3;TWNK;PRKCA;TRAF2;ATG14;ERN1;AFG3L2;PLCB3;PLCB4;PSMA4;PIK3CA;PPIF;VDAC2;ULK1;VDAC1;PIK3C3;PLCB2;SLC25A4;SLC25A6;GRIA2;BECN1;PSMD12;PSMD11;ITPR1;PIK3R4;ITPR2;PIK3R3;ITPR3;OMA1;ATXN3;MAPK9;ATXN2;GRIN2A;MAPK8;RELN;PSMB3;ATXN1L;NRBF2;GRIA3;NOP56;XBP1;NFYA;PUM1;GRIN2B;MTOR;GRIN2D;GRIN1;MAPK10;GRIN…
Vascular smooth muscle contraction	79/133	0.999996	0.999998	0	0	0.383821	1.72034e-06	MYLK2;GUCY1B1;ARAF;CALML3;ADM;MYL6B;ADRA1B;ADRA1A;ACTG2;MYLK3;MYLK4;PPP1CB;EDNRA;PRKACA;PRKACB;GUCY1A2;GUCY1A1;EDN1;PLA2G12A;PLA2G4F;PTGIR;MAP2K2;PRKCH;ARHGEF12;EDN2;PLA2G12B;PPP1R12A;PRKCB;PRKCE;PRKCD;PLA2G4C;PLA2G4A;PRKCA;AVPR1A;RHOA;ACTA2;MYL6;PLCB3;ADCY9;PLCB4;ADORA2A;AGTR1;ARHGEF1;AVP;RAF1;MYL9;PLCB2;CALCA;CALCRL;ROCK1;ROCK2;NPR2;ITPR1;ITPR2;PLA2G3;ADCY3;CACNA1D;ITPR3;ADCY2;CACNA1C;CACNA1F;P…
Estrogen signaling pathway	73/137	0.999996	0.999998	0	0	0.298414	1.32946e-06	KRT23;PIK3CD;CALML3;PIK3CB;GRM1;CREB3L3;CREB3L4;AKT2;GPER1;PRKACA;PRKACB;HRAS;NCOA1;NCOA2;HSP90AA1;MAP2K2;MMP2;NCOA3;PRKCD;FOS;MMP9;CREB3;PLCB3;ADCY9;CREB1;PLCB4;PIK3CA;RARA;FKBP4;RAF1;SOS1;PLCB2;SOS2;ATF4;FKBP5;CREB5;HBEGF;SHC2;SHC1;ITPR1;GNAI3;ITPR2;PIK3R3;ADCY3;ITPR3;ADCY2;ADCY8;ADCY7;GNAI1;GNAI2;NRAS;MAPK1;KCNJ3;MAPK3;KCNJ5;JUN;GABBR1;HSPA6;HSPA2;KRT10;ESR2;GNAO1;POMC;KRT19;KRT18;KRT17;GNAQ;K…
Oxidative phosphorylation	58/133	0.999996	0.999998	0	0	0.20159	8.89666e-07	NDUFA10;TCIRG1;ATP6V1E1;ATP6V1G2;ATP6AP1;SDHC;SDHD;COX6B2;SDHA;SDHB;NDUFS8;NDUFS7;UQCRC1;ATP6V1B2;NDUFS2;ND1;NDUFS1;UQCRC2;ATP6V0D1;ND3;ATP6V0D2;ND2;ATP6V0C;ND5;ND4;ATP6V1B1;ATP6V1A;ND6;ATP8;COX15;ATP6;NDUFA4L2;COX7A1;ATP5F1A;ATP5F1B;ATP6V0A2;COX3;ATP6V1H;COX11;COX2;ATP6V0A4;COX1;CYC1;NDUFV3;ATP6V0E2;ATP6V1G3;ATP6V1D;NDUFV1;ATP6V1C1;COX10;ATP6V0A1;ATP6V1C2;LHPP;NDUFA5;ND4L;ATP5F1D;ATP4B;CYTB
mRNA surveillance pathway	56/98	0.999996	0.999998	0	0	0.350316	1.48737e-06	HBS1L;NXT1;PPP2R2A;MSI2;NXT2;SMG7;PABPN1L;PPP1CB;PNN;PPP2R1B;CLP1;PPP2R5E;PAPOLG;PABPC4L;PAPOLA;PELO;UPF2;UPF1;PABPC4;PABPC5;PPP2R5A;PPP2R5D;PPP2R5C;SRRM1;DDX19A;DDX19B;DDX39B;WDR82;PABPC1;RNMT;CSTF3;CSTF2T;GSPT1;PPP2CA;PPP2CB;NXF3;PABPN1;PPP2R3C;NXF5;CPSF4;CPSF7;CPSF6;RNGTT;FUS;ALYREF;PYM1;UPF3B;PPP2R3A;MAGOHB;PPP1CA;NUDT21;PPP2R2B;PPP2R2D;NXF2B;RNPS1;TARDBP
Various types of N-glycan biosynthesis	18/39	0.999996	0.999998	0	0	0.225801	9.31807e-07	B4GALT2;CHST8;B4GALT3;CHST9;TUSC3;HEXB;ALG13;FUT8;MAN2A1;MGAT4A;MAN1C1;MAN1A1;MGAT1;MGAT2;STT3B;B4GALNT3;B4GALNT4;ST3GAL3
Ribosome biogenesis in eukaryotes	50/108	0.999996	0.999998	0	0	0.225537	9.30317e-07	RBM28;POP7;NXT1;POP1;NVL;RPP30;NAT10;NXT2;FBL;XPO1;NOB1;UTP14A;RPP38;REXO1;CSNK2A1;CSNK2A3;CSNK2A2;RPP25L;GNL3;REXO5;XRN1;DKC1;XRN2;NHP2;SBDS;RPP25;HEATR1;SNU13;AK6;NOL6;NXF3;TCOF1;RNA5-8SN3;RNA5-8SN2;NXF5;RNA5-8SN5;RNA5-8SN4;NOP56;NOP58;UTP6;UTP4;RPP40;RCL1;TBL3;NXF2B;MPHOSPH10;RNR2;RNR1;NOP10;RAN
Morphine addiction	51/91	0.999996	0.999998	0	0	0.335045	1.37121e-06	GABRB3;GABRB2;GABRB1;ARRB1;ARRB2;GNGT2;PDE4B;PDE4A;PRKACA;PDE8A;PRKACB;PRKCB;PDE4D;PRKCA;GABRG3;ADCY9;PDE1C;PDE1B;GNAI3;ADCY3;ADCY2;ADCY8;ADCY7;GNAI1;GNAI2;GNG10;GNG3;GRK3;GNG2;GRK2;GRK5;GNG4;GNG7;GRK6;GABRE;KCNJ3;GABRA2;GABRQ;GABRP;KCNJ5;GABBR1;GABRA4;PDE2A;GNG12;GNG11;GNAO1;PDE10A;GNB2;GNB4;GNB3;GNB5
Salivary secretion	52/93	0.999996	0.999998	0	0	0.333223	1.35076e-06	GUCY1B1;AMY2A;AMY2B;CALML3;AQP5;SLC4A2;ADRA1B;ADRA1A;CD38;NOS1;PRKACA;PRKACB;GUCY1A2;GUCY1A1;AMY1A;PRKCB;AMY1B;AMY1C;ATP1B3;PRKCA;ATP1B2;ATP1B1;PLCB3;ADCY9;PLCB4;PLCB2;VAMP2;ATP1A4;ITPR1;ADCY3;ATP1A3;ITPR2;ADCY2;ADRB1;ITPR3;ADRB2;ATP1A1;ADCY8;ADCY7;CST3;CST2;CST1;KCNN4;SLC12A2;ATP2B4;ATP2B3;ATP2B1;LYZ;MUC5B;GNAQ;CALM1;CALM2
Cytosolic DNA-sensing pathway	33/63	0.999996	0.999998	0	0	0.289426	1.15158e-06	CCL4L2;CGAS;IKBKB;PYCARD;TBK1;CCL5;CCL4;CASP1;POLR2F;IKBKE;ZBP1;IL33;CHUK;RIPK3;TREX1;IL18;NFKB1;NFKBIA;CXCL10;IL6;MAVS;AIM2;POLR3A;IRF3;STING1;POLR3C;IL1B;POLR1C;POLR3E;IRF7;POLR3H;POLR3K;NFKBIB
Cardiac muscle contraction	46/87	0.999996	0.999998	0	0	0.294662	1.13369e-06	RYR2;ATP2A3;ATP1A4;ATP2A2;ATP1A3;ATP2A1;CACNA1D;ATP1A1;CACNA1C;CACNA1F;COX7A1;SLC8A1;CACNG8;COX3;COX2;COX1;CYC1;CACNG4;CACNG5;TPM4;TPM3;CACNA2D1;TNNC1;TPM2;TPM1;CACNA2D3;CACNA2D2;ATP1B3;ATP1B2;CACNA2D4;ATP1B1;COX6B2;CACNB1;SLC8A3;CACNB2;CACNB3;CACNB4;ASPH;SLC9A6;SLC9A7;MYL2;TNNT2;UQCRC1;UQCRC2;CYTB;MYH7
Taste transduction	35/86	0.999996	0.999998	0	0	0.179679	6.86434e-07	KCNK5;TAS2R60;HCN4;PDE1C;PDE1B;PKD2L1;ITPR3;CACNA1C;PKD1L3;ADCY8;GRM1;CALHM1;SCN9A;PRKACA;TAS2R3;PRKACB;SCN3A;TAS2R5;GABRA2;GABBR1;ENTPD2;HTR3E;GABRA4;TAS2R13;TAS2R14;HTR3A;SCNN1G;PLCB3;PLCB4;P2RX2;SCNN1B;SCNN1A;GNB3;SCN2A;PLCB2
N-Glycan biosynthesis	21/50	0.999997	0.999998	0	0	0.190432	5.98628e-07	B4GALT2;B4GALT3;ST6GAL1;ALG6;TUSC3;ALG13;DOLK;DPM1;FUT8;GANAB;MAN2A1;MGAT5B;DOLPP1;MGAT4A;MAN1C1;MGAT3;MAN1A1;MGAT1;MGAT2;STT3B;ALG10B
Basal transcription factors	20/45	0.999997	0.999998	0	0	0.210572	6.50336e-07	GTF2A1;GTF2A2;TAF15;TAF12;CCNH;TAF11;GTF2F1;GTF2E1;GTF2F2;TAF7L;TAF6L;ERCC3;ERCC2;TAF8;TAF9B;MNAT1;TAF4;TAF3;TAF2;GTF2I
Fat digestion and absorption	19/43	0.999997	0.999998	0	0	0.208415	6.40179e-07	ABCA1;SCARB1;ABCG5;PLA2G12A;PLA2G2D;PLA2G12B;MOGAT2;MTTP;GOT2;PLA2G2A;PLA2G3;CEL;AGPAT1;ACAT1;FABP1;CD36;APOB;PLPP3;PLPP2
Proteasome	14/46	0.999997	0.999998	0	0	0.114919	3.49688e-07	PSMD12;PSMD11;PSMB10;PSMB8;PSMB9;PSMA4;PSMC6;IFNG;PSMB3;PSMD3;PSME4;PSME1;PSMD1;PSME2
Phototransduction	2028-09-01	0.999998	0.999998	0	0	0.124774	3.11779e-07	GRK1;GNAT2;PDE6G;CALML3;PDE6B;PDE6A;CALM1;CALM2;CNGB1

## Sheet: cGAS-STING pathways genes 
Gene symbol
CCL4L2
CGAS
IKBKB
PYCARD
TBK1
CCL5
CCL4
CASP1
POLR2F
IKBKE
ZBP1
IL33
CHUK
RIPK3
TREX1
IL18
NFKB1
NFKBIA
CXCL10
IL6
MAVS
AIM2
POLR3A
IRF3
STING1
POLR3C
DDX58
IL1B
POLR1C
POLR3E
IRF7
POLR3H
POLR3K
NFKBIB
