# Supplementary material for: Rosavin improves insulin resistance and alleviates hepatic and kidney damage via modulating the cGAS-STING pathway and autophagy signaling in HFD/STZ-induced T2DM animals
Source: Royal Society of Chemistry journal article supplement (doi:10.1039/d4md00023d), 2024-01-01
Supplement: d4md00023d3.xlsx [file d4md00023d3.xlsx]

## Sheet: Sheet1
Gene	Closeness	Betweenness	Degree
IL1B	0.0357143	30.0485	24
DDX58	0.0344828	13.3536	23
IL6	0.0344828	25.697	23
IRF3	0.0344828	41.8831	23
CASP1	0.0333333	14.6779	22
MAVS	0.0333333	10.2449	22
IL18	0.0322581	18.0598	21
TBK1	0.03125	6.84962	20
IRF7	0.03125	6.65723	20
IKBKB	0.030303	5.06377	19
NFKB1	0.030303	5.83833	19
NFKBIA	0.030303	5.83833	19
CXCL10	0.030303	14.8008	19
CCL5	0.0294118	6.1258	18
CHUK	0.0294118	3.89582	18
ZBP1	0.0277778	6.74426	17
MB21D1	0.0277778	18.7089	16
IKBKE	0.0277778	4.45338	16
AIM2	0.027027	2.58888	15
PYCARD	0.0263158	5.55621	14
RIPK3	0.0263158	1.68712	14
CCL4	0.025641	5.10684	13
STING1	0.025	0.82767	12
NFKBIB	0.0243902	0.624698	12
