# Supplementary material for: Rosavin improves insulin resistance and alleviates hepatic and kidney damage via modulating the cGAS-STING pathway and autophagy signaling in HFD/STZ-induced T2DM animals
Source: Royal Society of Chemistry journal article supplement (doi:10.1039/d4md00023d), 2024-01-01
Supplement: d4md00023d4.pdf [file d4md00023d4.pdf]

## Supplementary information:

## Supplementary Figures:

**S1 Figures:** Validation of the significant expression of the candidate mRNAs (ZBP1, STING1, and DDX58=RIG-1) in the T2DM-related tissues using THE HUMAN PROTEIN ATLAS database <https://www.proteinatlas.org/>, Jan 2022.

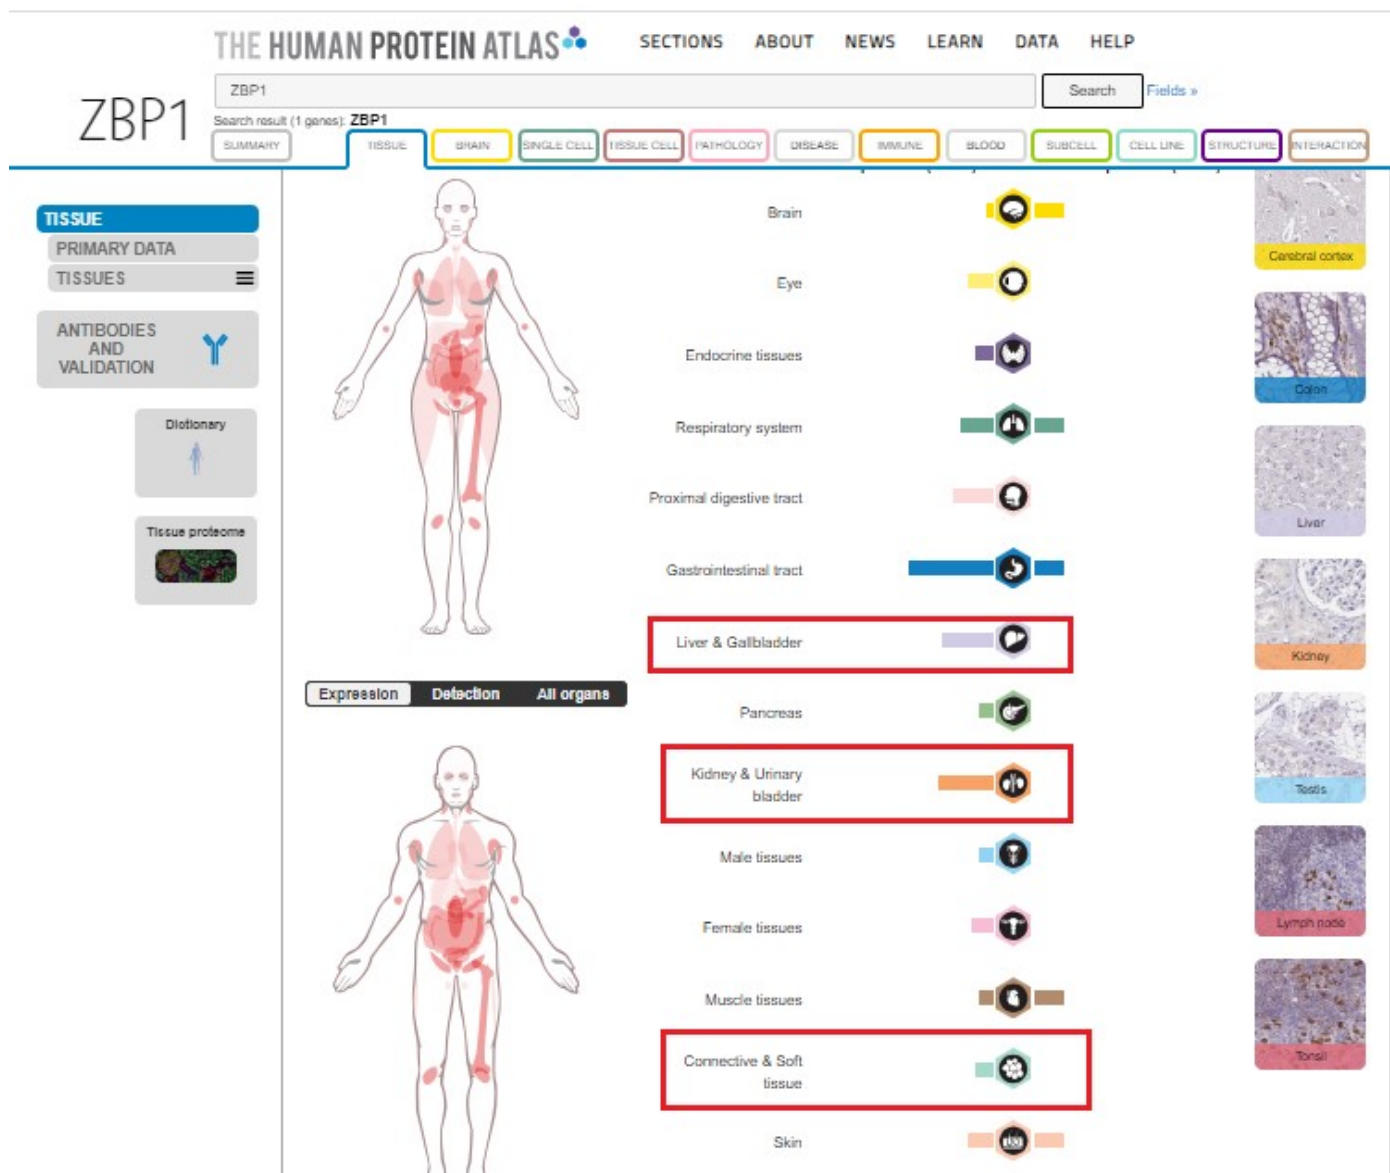

# STING1

STING1

Search

Fields »

Search result (2 genes): **STING1** | STEEP1

SUMMARY

TISSUE

BRAIN

SINGLE CELL

TISSUE CELL

PATHOLOGY

DISEASE

IMMUNE

BLOOD

SUBCELL

CELL LINE

STRUCTURE

INTERACTION

**TISSUE**

PRIMARY DATA

TISSUES

ANTIBODIES AND VALIDATION

Dictionary

Tissue proteome

RNA AND PROTEIN EXPRESSION SUMMARY

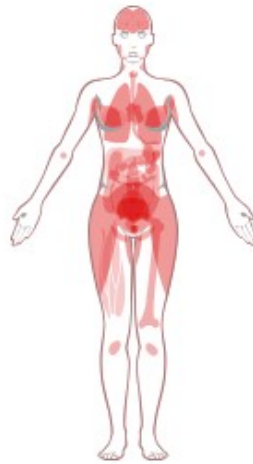

Expression Detection All organs

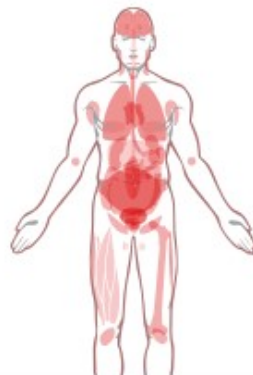

RNA expression (nTPM)<sup>1</sup>

Protein expression (score)<sup>2</sup>

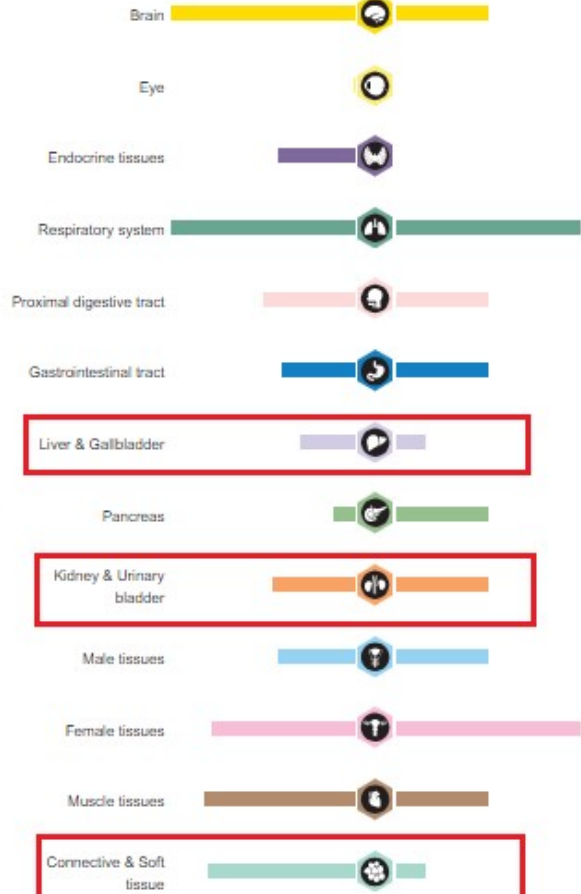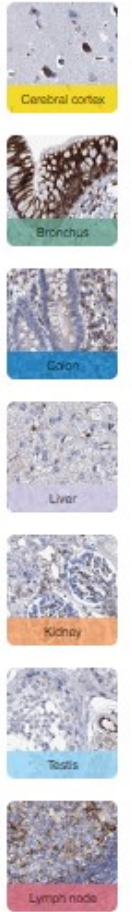

RIGI

DDX58 Search Fields »

Search result (2 genes): RIGI | ARL16

- SUMMARY
- TISSUE
- BRAIN
- SINGLE CELL
- TISSUE CELL
- PATHOLOGY
- DISEASE
- IMMUNE
- BLOOD
- SUBCELL
- CELL LINE
- STRUCTURE
- INTERACTION

TISSUE

PRIMARY DATA

TISSUES

ANTIBODIES AND VALIDATION

Dictionary

Tissue proteome

RNA AND PROTEIN EXPRESSION SUMMARY

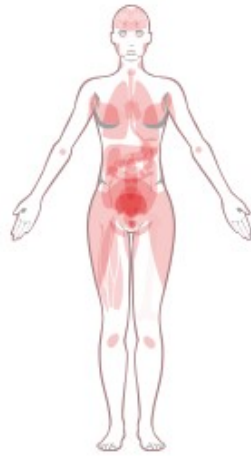

Expression Detection All organs

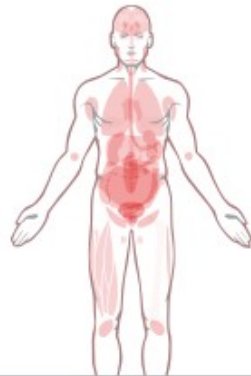

RNA expression (nTPM)

Protein expression (score)

| Tissue                   | RNA expression (nTPM) | Protein expression (score) | Image           |
|--------------------------|-----------------------|----------------------------|-----------------|
| Brain                    | Low                   | Low                        | Cerebral cortex |
| Eye                      | Low                   | Low                        | Colon           |
| Endocrine tissues        | Low                   | Low                        | Liver           |
| Respiratory system       | Low                   | Low                        | Kidney          |
| Proximal digestive tract | Low                   | Low                        | Testis          |
| Gastrointestinal tract   | Low                   | Low                        | Lymph node      |
| Liver & Gallbladder      | High                  | High                       |                 |
| Pancreas                 | Low                   | Low                        |                 |
| Kidney & Urinary bladder | High                  | High                       |                 |
| Male tissues             | Low                   | Low                        |                 |
| Female tissues           | Low                   | Low                        |                 |
| Muscle tissues           | Low                   | Low                        |                 |
| Connective & Soft tissue | Low                   | Low                        |                 |

**S2 Figures:** Validation of the implication of the candidate mRNAs (ZBP1, STING1, and DDX58=RIG-1) in the development of diabetes, and kidney and liver diseases using DisGeNET database (<https://www.disgenet.org/home/>), the Expression Atlas database (<https://www.ebi.ac.uk/gxa/home>) and diseases database (<https://diseases.jensenlab.org/Search>), Jan 2022.

## DISEASES

Disease-gene associations mined from literature

Search
Downloads
About

### ZBP1 disease associations

ZBP1 [ENSP00000360215]

Z-DNA-binding protein 1. Participates in the detection by the host's innate immune system of DNA from viral, bacterial or even host origin. Plays a role in host defense against tumors and pathogens. Acts as a cytoplasmic DNA sensor which, when activated, induces the recruitment of TBK1 and IRF3 to its C-terminal region and activates the downstream interferon regulatory factor (IRF) and NF-kappa B transcription factors, leading to type-I interferon production. ZBP1-induced NF-kappaB activation probably involves the recruitment of the RHIM-containing kinases RIPK1 and RIPK3 (By similarity).

Synonyms: ZBP1, ZBP1p, hZBP1, HOY8D1, Q9H171 ...

Linkouts: STRING Pharos UniProt OMIM

#### Text mining

< Prev | Next >

| Name                                            | Z-score | Confidence |
|-------------------------------------------------|---------|------------|
| Adult respiratory distress syndrome             | 2.3     | *****      |
| Human immunodeficiency virus infectious disease | 2.2     | *****      |
| Listeriosis                                     | 2.1     | *****      |
| Cowpox                                          | 2.1     | *****      |
| Deconvulsating disease                          | 2.1     | *****      |
| Diabetes                                        | 2.1     | *****      |
| Parasitosis                                     | 2.1     | *****      |
| Liver disease                                   | 2.1     | *****      |
| Kidney disease                                  | 2.1     | *****      |
| Chickenpox                                      | 2.0     | *****      |

## Expression Atlas

Gene expression across species and biological conditions

Query single cell expression

To Single Cell Expression Atlas >

Home
Browse experiments
Download
Release notes
FAQ
Help
Licence
About
Support

### Results for ZBP1 (symbol) AND diabetes mellitus

Baseline expression
Differential expression

Filter your results

Kingdom

Animals

Species

Homo sapiens

Mus musculus

Experiment type

Microarray 1-colour mRNA differential

RNA-seq mRNA differential

Display log<sub>2</sub>-fold change

Download results

| Log <sub>2</sub> -fold change | Species | Gene name   | Comparison                                                                        | Experimental variables                                 | Experiment name                                                                                                                                         |
|-------------------------------|---------|-------------|-----------------------------------------------------------------------------------|--------------------------------------------------------|---------------------------------------------------------------------------------------------------------------------------------------------------------|
| 1.1                           |         | <u>Zbp1</u> | 'control; streptozotocin-induced diabetes' vs 'control; control'                  | diet, phenotype                                        | <u>Hepatic gene expression in streptozotocin-induced diabetic mice fed a phloridzin diet</u>                                                            |
| 1.1                           |         | <u>ZBP1</u> | 'advanced' vs 'early' in 'steatosis; liver disease; Hepatitis C virus genotype 3' | clinical information, disease, disease staging, infect | <u>RNA-seq of hepatic biopsies taken from patients with chronic liver disease presenting with different aetiologies (HCV, FLD) and fibrosis stages.</u> |



**S3 Figure:** The visualization of the candidate mRNAs (ZBP1, STING1, and DDX58=RIG-1) in the cGAS-STING pathway through KEGG pathway database (<https://www.genome.jp/kegg/>, Jan 2022)

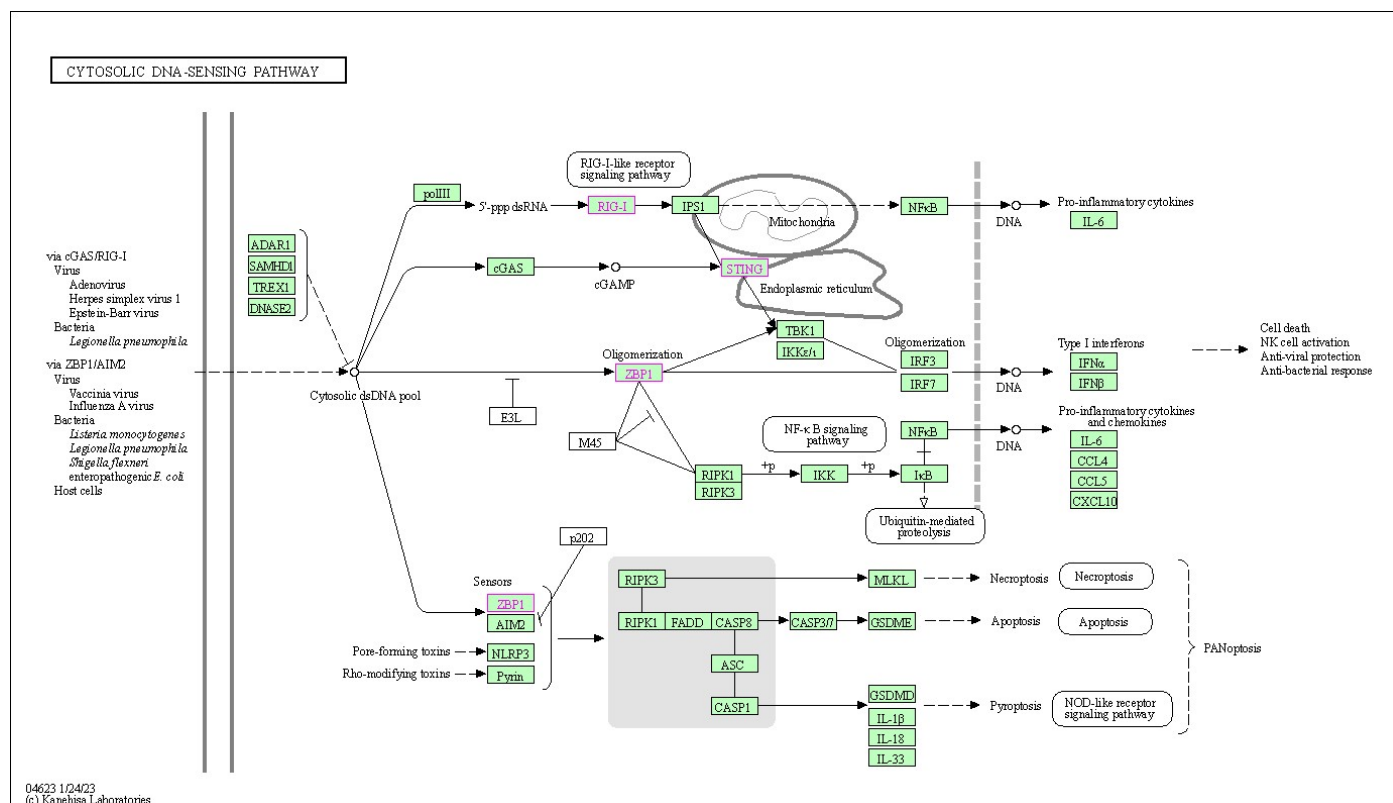

**S4 Figures:** Validation of the implication of the selected biochemical effectors proteins (LC3B=MAP1LC3B, and TNF) in the development of diabetes, and kidney and liver diseases using DisGeNET database (<https://www.disgenet.org/home/>), Jan 2022.

Summary of GDAs | Evidences for GDAs | Summary of VDAs | Evidences for VDAs

MAP1LC3B, microtubule associated protein 1 light chain 3 beta, 81631

N. diseases: 167; N. variants: 1

Source: ALL

Results per page 200

Filter within current results:

| Disease ^            | Type ⇅  | Disease Class ⇅          | Semantic Type ⇅     | N. genes <sub>d</sub> ⇅ | N. SNPs <sub>d</sub> ⇅ | Score <sub>gda</sub> ⇅ | EL <sub>gda</sub> ⇅ | EI <sub>gda</sub> ⇅ | N. PMIDs ⇅ | N. SNPs <sub>gda</sub> ⇅ | First Ref. ⇅ | Last Ref. ⇅ |
|----------------------|---------|--------------------------|---------------------|-------------------------|------------------------|------------------------|---------------------|---------------------|------------|--------------------------|--------------|-------------|
| Diabetes Mellitus    | group   | Nutritional and Metab... | Disease or Syndr... | 2803                    | 824                    | 0.010                  | None                | 1.000               | 1          |                          | 2019         | 2019        |
| Diabetic Retinopathy | disease | Eye Diseases; Endoc...   | Disease or Syndr... | 645                     | 213                    | 0.020                  | None                | 1.000               | 2          |                          | 2017         | 2019        |

---

MAP1LC3B, microtubule associated protein 1 light chain 3 beta, 81631

N. diseases: 167; N. variants: 1

Source: ALL

Results per page 200

Filter within current results: liver

| Disease ^                              | Type ⇅    | Disease Class ⇅         | Semantic Type ⇅     | N. genes <sub>d</sub> ⇅ | N. SNPs <sub>d</sub> ⇅ | Score <sub>gda</sub> ⇅ | EL <sub>gda</sub> ⇅ | EI <sub>gda</sub> ⇅ | N. PMIDs ⇅ | N. SNPs <sub>gda</sub> ⇅ | First Ref. ⇅ | Last Ref. ⇅ |
|----------------------------------------|-----------|-------------------------|---------------------|-------------------------|------------------------|------------------------|---------------------|---------------------|------------|--------------------------|--------------|-------------|
| Adult Liver Carcinoma                  | disease   | Digestive System Dis... | Neoplastic Process  | 1377                    | 72                     | 0.010                  | None                | 1.000               | 1          |                          | 2018         | 2018        |
| Chemical and Drug Induced Liver Injury | disease   | Digestive System Dis... | Disease or Syndr... | 461                     | 38                     | 0.300                  | None                | 1.000               | 1          |                          | 2014         | 2014        |
| Chemically-Induced Liver Toxicity      | disease   | Digestive System Dis... | Disease or Syndr... | 412                     |                        | 0.300                  | None                | 1.000               | 1          |                          | 2014         | 2014        |
| Drug-Induced Acute Liver Injury        | disease   | Digestive System Dis... | Disease or Syndr... | 413                     |                        | 0.300                  | None                | 1.000               | 1          |                          | 2014         | 2014        |
| Drug-Induced Liver...                  | phenotype | Digestive System Dis... | Disease or Syndr... | 537                     | 29                     | 0.300                  | None                | 1.000               | 1          |                          | 2014         | 2014        |
| Liver and Intrahepa...                 | disease   | Digestive System Dis... | Neoplastic Process  | 1395                    | 73                     | 0.010                  | None                | 1.000               | 1          |                          | 2018         | 2018        |
| Liver carcinoma                        | disease   | Digestive System Dis... | Neoplastic Process  | 5725                    | 942                    | 0.060                  | None                | 1.000               | 6          |                          | 2014         | 2018        |

---

MAP1LC3B, microtubule associated protein 1 light chain 3 beta, 81631

N. diseases: 167; N. variants: 1

Source: ALL

Results per page 200

Filter within current results: renal

| Disease ^                                      | Type ⇅  | Disease Class ⇅       | Semantic Type ⇅    | N. genes <sub>d</sub> ⇅ | N. SNPs <sub>d</sub> ⇅ | Score <sub>gda</sub> ⇅ | EL <sub>gda</sub> ⇅ | EI <sub>gda</sub> ⇅ | N. PMIDs ⇅ | N. SNPs <sub>gda</sub> ⇅ | First Ref. ⇅ | Last Ref. ⇅ |
|------------------------------------------------|---------|-----------------------|--------------------|-------------------------|------------------------|------------------------|---------------------|---------------------|------------|--------------------------|--------------|-------------|
| Conventional (Clear Cell) Renal Cell Carcinoma | disease | Neoplasms; Female ... | Neoplastic Process | 2346                    | 222                    | 0.040                  | None                | 1.000               | 4          |                          | 2012         | 2019        |
| Renal Cell Carcino...                          | disease | Neoplasms; Female ... | Neoplastic Process | 2084                    | 288                    | 0.020                  | None                | 1.000               | 2          |                          | 2019         | 2019        |

TNF, tumor necrosis factor, 7124

1 - 200 of 2724 results

Download Share

N. diseases: 2724; N. variants: 31

Add/Remove filter

Source: ALL

Results per page 200

Filter within current results: diab

| Disease                 | Type    | Disease Class            | Semantic Type       | N. genes <sub>d</sub> | N. SNPs <sub>d</sub> | Score <sub>gda</sub> | EL <sub>gda</sub> | EI <sub>gda</sub> | N. PMIDs | N. SNPs <sub>gda</sub> | First Ref. | Last Ref. |
|-------------------------|---------|--------------------------|---------------------|-----------------------|----------------------|----------------------|-------------------|-------------------|----------|------------------------|------------|-----------|
| Diabetes Mellitus       | disease | Nutritional and Metab    | Disease or Syndr    | 3134                  | 2672                 | 0.600                | None              | 0.950             | 179      | 7                      | 1995       | 2020      |
| Diabetes Mellitus       | disease | Nutritional and Metab    | Experimental Mo     | 522                   |                      | 0.500                | None              | 1.000             | 10       |                        | 2002       | 2014      |
| Diabetes Mellitus, I... | disoco  | Nutritional and Metab... | Disease or Syndr... | 1675                  | 954                  | 0.400                | None              | 0.950             | 101      | 2                      | 1989       | 2020      |
| Diabetic Nephropathy    | disoco  | Female Urogenital Dis... | Disease or Syndr... | 1189                  | 238                  | 0.300                | None              | 0.957             | 47       | 3                      | 1997       | 2020      |

TNF, tumor necrosis factor, 7124

1 - 200 of 2724 results

Download Share

N. diseases: 2724; N. variants: 31

Add/Remove filter

Source: ALL

Results per page 200

Filter within current results: kid

| Disease                | Type    | Disease Class           | Semantic Type       | N. genes <sub>d</sub> | N. SNPs <sub>d</sub> | Score <sub>gda</sub> | EL <sub>gda</sub> | EI <sub>gda</sub> | N. PMIDs | N. SNPs <sub>gda</sub> | First Ref. | Last Ref. |
|------------------------|---------|-------------------------|---------------------|-----------------------|----------------------|----------------------|-------------------|-------------------|----------|------------------------|------------|-----------|
| Kidney Failure, Acute  | disease | Female Urogenital Di... | Disease or Syndr... | 826                   | 32                   | 0.400                | None              | 1.000             | 29       | 1                      | 2002       | 2020      |
| Kidney Failure, Chr... | disease | Female Urogenital Di... | Disease or Syndr... | 827                   | 425                  | 0.400                | None              | 0.960             | 25       |                        | 1994       | 2019      |

TNF, tumor necrosis factor, 7124

1 - 200 of 2724 results

Download Share

N. diseases: 2724; N. variants: 31

Add/Remove filter

Source: ALL

Results per page 200

Filter within current results: liver

| Disease                                | Type    | Disease Class            | Semantic Type       | N. genes <sub>d</sub> | N. SNPs <sub>d</sub> | Score <sub>gda</sub> | EL <sub>gda</sub> | EI <sub>gda</sub> | N. PMIDs | N. SNPs <sub>gda</sub> | First Ref. | Last Ref. |
|----------------------------------------|---------|--------------------------|---------------------|-----------------------|----------------------|----------------------|-------------------|-------------------|----------|------------------------|------------|-----------|
| Liver Failure, Acute                   | disease | Digestive System Dis...  | Disease or Syndr... | 282                   | 21                   | 0.600                | None              | 1.000             | 27       |                        | 1998       | 2019      |
| Chemical and Drug Induced Liver Injury | disease | Digestive System Dis...  | Disease or Syndr... | 461                   | 38                   | 0.500                | None              | 1.000             | 12       |                        | 1995       | 2019      |
| Liver Cirrhosis, Experimental          | disease | Pathological Conditio... | Experimental Mo...  | 870                   |                      | 0.500                | None              | 1.000             | 2        |                        | 2005       | 2014      |
| Liver carcinoma                        | disease | Digestive System Dis...  | Neoplastic Process  | 5725                  | 942                  | 0.400                | None              | 0.979             | 146      | 2                      | 1990       | 2020      |
| Liver diseases                         | group   | Digestive System Dis...  | Disease or Syndr... | 1019                  | 100                  | 0.400                | None              | 1.000             | 30       |                        | 1991       | 2019      |
| Fatty Liver                            | disease | Digestive System Dis...  | Disease or Syndr... | 875                   | 35                   | 0.400                | None              | 0.950             | 20       |                        | 2006       | 2020      |
| Liver neoplasms                        | group   | Digestive System Dis...  | Neoplastic Process  | 1424                  | 7                    | 0.400                | None              | 1.000             | 16       |                        | 1990       | 2019      |
| Malignant neoplas...                   | disease | Digestive System Dis...  | Neoplastic Process  | 1649                  | 88                   | 0.400                | None              | 1.000             | 13       |                        | 2008       | 2019      |

Activate Windows  
Go to Settings to activate Windows.



**S5 Figure:** Validation of the interaction between the three key mRNAs and two effector proteins with the retrieved miR-1976 from mirwalk3 (<http://mirwalk.umm.uni-heidelberg.de/>, Jan 2022)

miRWalk

HOME FAQ RESOURCES ABOUT

hsa-miR-1976 GeneSymbol 0.9 3UTR set filter

| miRNA        | RefseqID     | GeneSymbol | Duplex  | Score | Position | Binding Site | Au   | Me      | N Pairings | Targetscan | Mirdb | Mirtarbase |
|--------------|--------------|------------|---------|-------|----------|--------------|------|---------|------------|------------|-------|------------|
| hsa-miR-1976 | NM_001367258 | STING1     | details | 1.00  | 3UTR     | 1667,1693    | 0.43 | -5.481  | 18         | —          | —     | —          |
| hsa-miR-1976 | NM_198282    | STING1     | details | 1.00  | 3UTR     | 1894,1920    | 0.43 | -5.481  | 18         | —          | —     | —          |
| hsa-miR-1976 | NM_014314    | DDX58      | details | 0.92  | 3UTR     | 4343,4393    | 0.43 | -4.171  | 15         | —          | —     | —          |
| hsa-miR-1976 | NM_014314    | DDX58      | details | 1.00  | 3UTR     | 4002,4020    | 0.47 | -12.956 | 14         | —          | —     | —          |
| hsa-miR-1976 | NM_022818    | MAP1LC3B   | details | 0.92  | 3UTR     | 1298,1314    | 0.59 | -6.675  | 11         | —          | —     | —          |
| hsa-miR-1976 | NM_001160418 | ZBP1       | details | 0.92  | 3UTR     | 1627,1656    | 0.41 | -5.495  | 18         | —          | —     | —          |
| hsa-miR-1976 | NM_001301738 | STING1     | details | 1.00  | 3UTR     | 1707,1733    | 0.43 | -5.481  | 18         | —          | —     | —          |

miRWalk

HOME FAQ RESOURCES ABOUT

hsa-miR-1976 GeneSymbol 0.9 5UTR set filter

| miRNA        | RefseqID  | GeneSymbol | Duplex  | Score | Position | Binding Site | Au   | Me     | N Pairings | Targetscan | Mirdb | Mirtarbase |
|--------------|-----------|------------|---------|-------|----------|--------------|------|--------|------------|------------|-------|------------|
| hsa-miR-1976 | NM_000594 | TNF        | details | 1.00  | 5UTR     | 14,33        | 0.43 | -9.268 | 16         | —          | —     | —          |

**S6 Figure:** The association of miR-1976 with cGAS-STING-related pathways through DIANA tools mirPath 3 (<http://www.microrna.gr/miRPathv3>, Jan 2022)

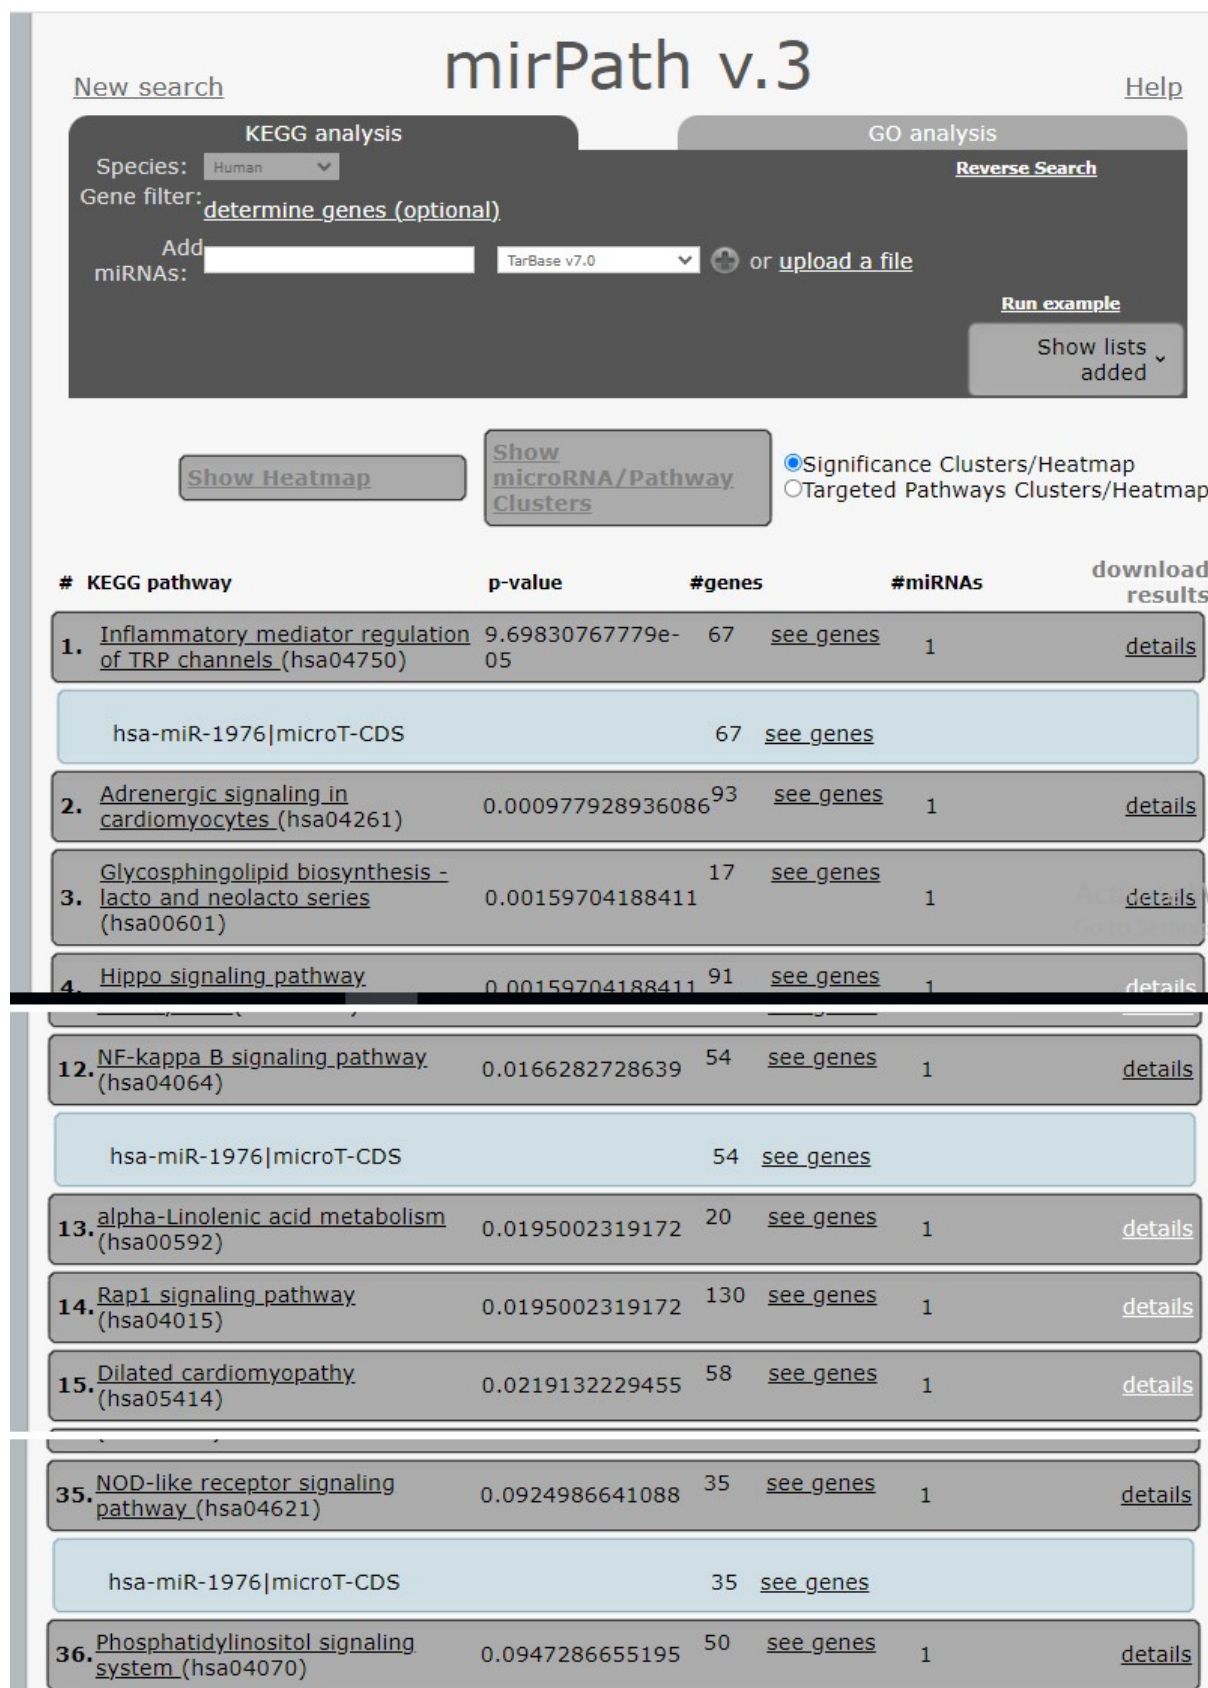

**Figure S7:** Retrieval of AC074117.2 lncRNA from DIANA Tools database (<https://diana.e-ce.uth.gr/lncbasev3>, Jan 2022)

miRNA:  Location:  [Clear All](#)

[Execute Search](#) [Clear All](#) [Download](#)

Interactions: 38, Experiments 1 (low: 0, high: 1) Cell lines: 1, Tissues: 1, Publications: 1

Filters [Reset](#)

- Tissue: [Select Tissues](#)
- Cell Type: [Select Cell Types](#)
- Method: [Select Methods](#)
- Validated As: [Select Validated as](#)
- Validation Type: [Select Validation Types](#)
- miRNA Conf. Level: [Select Confidence Levels](#)
- Biotypes: [Select Biotypes](#)
- Species: [Select Species](#)
- lncRNA Source: [Select lncRNA Sources](#)
- Variants: [All](#) [With](#) [Without](#)

Page: [First](#) [Previous](#) [1](#) [2](#) [3](#) [4](#) [Next](#) [Last](#)

| Gene name                  | miRNA name                   | Experiments | Publications | Cell Lines | Tissues | miRNA Conf. | DIANA Links                                                                                                                   |
|----------------------------|------------------------------|-------------|--------------|------------|---------|-------------|-------------------------------------------------------------------------------------------------------------------------------|
| <a href="#">AC007619.2</a> | <a href="#">hsa-miR-1976</a> | 1           | 1            | 1          | 1       | Low         | <a href="#">lncRNA Expr</a> <a href="#">UCSC</a> <a href="#">mT</a> <a href="#">TB</a> <a href="#">InP</a> <a href="#">mP</a> |
| <a href="#">AC012123.2</a> | <a href="#">hsa-miR-1976</a> | 1           | 1            | 1          | 1       | Low         | <a href="#">lncRNA Expr</a> <a href="#">UCSC</a> <a href="#">mT</a> <a href="#">TB</a> <a href="#">InP</a> <a href="#">mP</a> |
| <a href="#">AC012531.1</a> | <a href="#">hsa-miR-1976</a> | 1           | 1            | 1          | 1       | Low         | <a href="#">lncRNA Expr</a> <a href="#">UCSC</a> <a href="#">mT</a> <a href="#">TB</a> <a href="#">InP</a> <a href="#">mP</a> |
| <a href="#">AC013404.1</a> | <a href="#">hsa-miR-1976</a> | 1           | 1            | 1          | 1       | Low         | <a href="#">lncRNA Expr</a> <a href="#">UCSC</a> <a href="#">mT</a> <a href="#">TB</a> <a href="#">InP</a> <a href="#">mP</a> |
| <a href="#">AC074117.2</a> | <a href="#">hsa-miR-1976</a> | 1           | 1            | 1          | 1       | Low         | <a href="#">lncRNA Expr</a> <a href="#">UCSC</a> <a href="#">mT</a> <a href="#">TB</a> <a href="#">InP</a> <a href="#">mP</a> |

| Publication                             | Methods            | Tissue | Cell Type | Tested Cell Line | Category        | Experimental Condition         |
|-----------------------------------------|--------------------|--------|-----------|------------------|-----------------|--------------------------------|
| <a href="#">Karginov FV et al. 2013</a> | <a href="#">IP</a> | Kidney | 293S      | NA               | Embryonic/Fetal | <a href="#">Active Windows</a> |

**Figure S8:** lncRNA AC074117.2 / miR-1976 interaction using IntaRNA 2.0 tool.

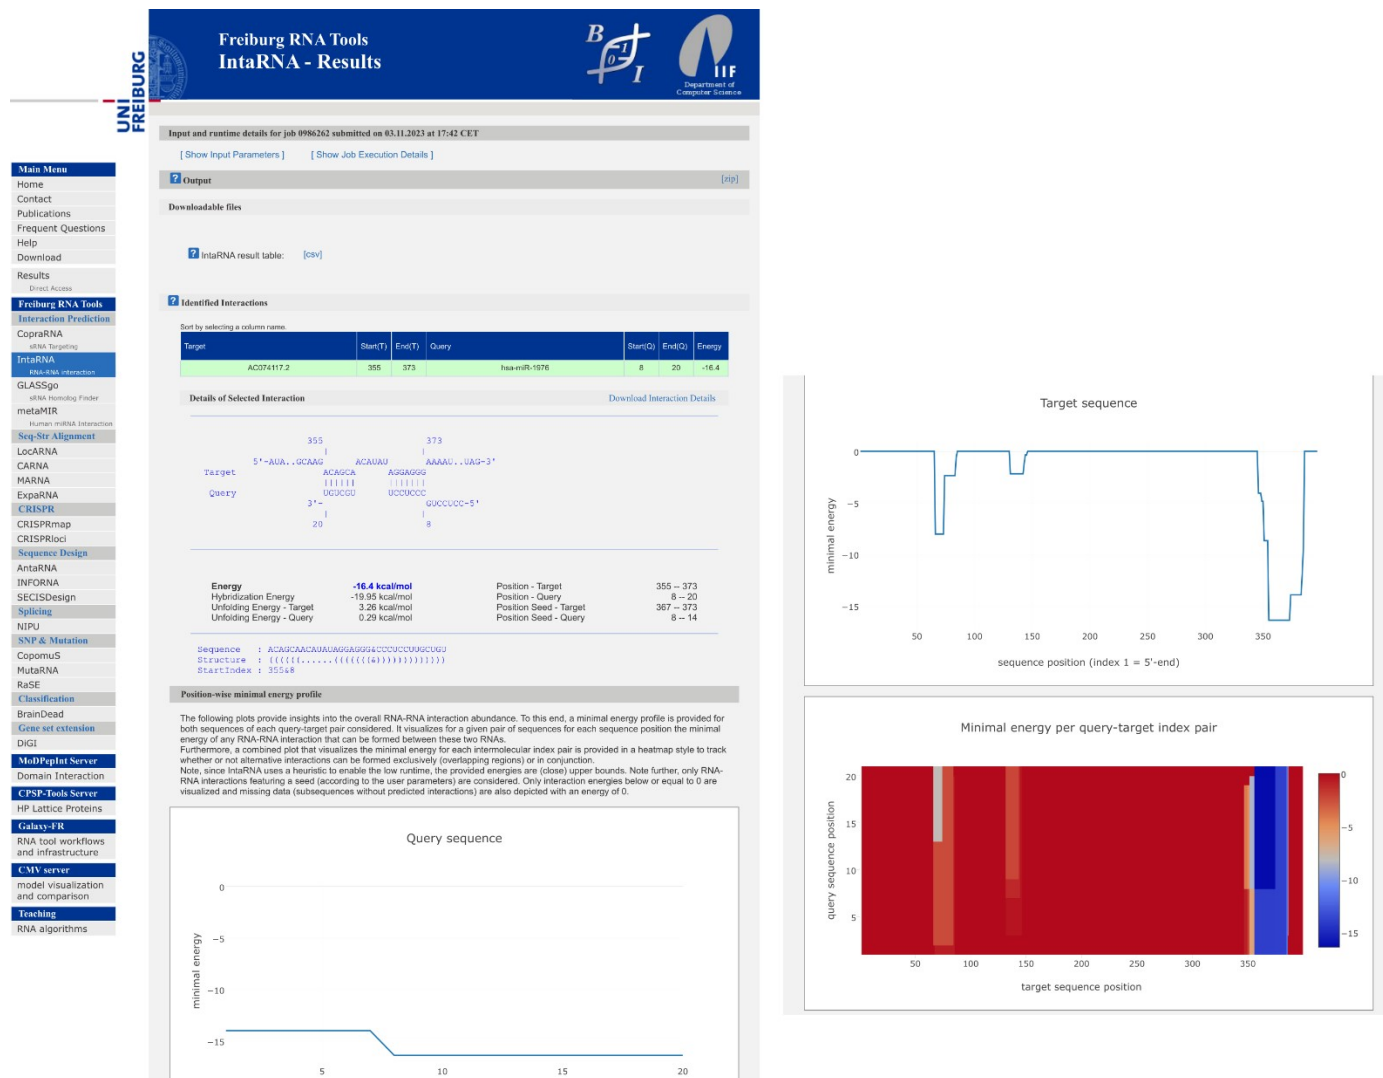

## Supplementary Tables:

**Table S4:** Primers used for qPCR.

| <b>Primer name</b>      | <b>Gene ID</b>  | <b>Cat.no.</b>                                | <b>Tm</b> | <b>Product size</b> |
|-------------------------|-----------------|-----------------------------------------------|-----------|---------------------|
| <i>TMEM173 (STING1)</i> | NM_198282       | 249900<br><b>Gene Globe ID:</b><br>QT00055440 | 70 °C     | 125 bp              |
| <i>ZBP1</i>             | NM_001160418    | 249900<br><b>Gene Globe ID:</b><br>QT00029631 | 70 °C     | 83 bp               |
| <i>DDX58</i>            | NM_014314       | 249900<br><b>Gene Globe ID:</b><br>QT00040509 | 70 °C     | 114 bp              |
| <i>GAPDH</i>            | NM_002046       | 249900<br><b>Gene Globe ID:</b><br>QT00079247 | 70°C      | 95 bp               |
| <i>miR_1976</i>         | MIMAT0009451    | 339350<br><b>Gene Globe ID:</b><br>ZP00000388 | 75 °C     | 85 bp               |
| <i>AC074117.2</i>       | ENST00000417130 | <b>Gene Globe ID:</b><br>UPFH0284997          | 58.8 °C   | 82 bp               |
